# Supplementary material for: Solid state structure and properties of phenyl diketopyrrolopyrrole derivatives
Source: Royal Society of Chemistry journal article supplement (doi:10.1039/d1ce00039j), 2021-01-01
Supplement: d1ce00039j1.pdf [file d1ce00039j1.pdf]

## Electronic supplementary information (ESI) for:

### Solid state structure and properties of phenyl diketopyrrolopyrrole derivatives

Joshua Humphreys,<sup>a,b</sup> Flavia Pop,<sup>a,b,§</sup> Paul A. Hume,<sup>c</sup> Alanna S. Murphy,<sup>a,b</sup> William Lewis,<sup>b,¶</sup> E. Stephen Davies,<sup>b</sup> Stephen P. Argent,<sup>b</sup> and David B. Amabilino\*<sup>a,b</sup>

<sup>a</sup> The GSK Carbon Neutral Laboratories for Sustainable Chemistry, The University of Nottingham Jubilee Campus, Triumph Road, Nottingham NG7 2TU, UK.

School of Chemistry, University of Nottingham, Nottingham NG7 2RD, UK. E-mail: [David.Amabilino@nottingham.ac.uk](mailto:David.Amabilino@nottingham.ac.uk).

<sup>c</sup> MacDiarmid Institute for Advanced Materials and Nanotechnology and School of Chemical and Physical Sciences, Victoria University of Wellington, Wellington 6010, New Zealand

<sup>§</sup> Current Address MOLTECH-Anjou, UMR 6200, CNRS, Univ. Angers, 2bd Lavoisier, 49045 Angers, France

<sup>¶</sup>Current address Chemistry Building, The University of Sydney, Eastern Avenue NSW 2006, Australia

#### Contents

1. Experimental section
2. <sup>1</sup>H NMR Spectra
3. <sup>13</sup>C NMR Spectra
4. IR Spectra
5. Mass Spectra
6. Electrochemistry
7. Crystallographic tables and data
8. Computational data
9. Supporting figures
10. Supporting tables
11. References

## Experimental section

General Methods and Materials. All commercially available reagents and solvents were used as received. Chromatography purifications were performed using Sigma-Aldrich Silica Gel (pore size 60Å, particle size 40- 63 µm) and thin-layer chromatography (TLC) was carried out on E. Merck silica gel plates, irradiated using UV light (365 nm). NMR spectra were acquired on a Bruker AV400, Bruker AV(III)500 or Bruker DPX300 spectrometers and NMR spectra were recorded at room temperature. All chemical shifts are reported in  $\delta$  parts per million (ppm), using the solvent residual signal as an internal standard and the coupling constant values (J) are reported in Hertz (Hz). The following abbreviations are used for signal multiplicities: s, singlet; d, doublet; t, triplet; m, multiplet; and b, broad. ESI-MS were recorded using a Bruker micro-TOF II instrument. Infra-red spectra were recorded on a Bruker Tensor 27 instrument equipped with a Pike GladiATR attachment with a diamond crystal. Melting points were determined on a Stuart SMP20 Melting Point Apparatus. Elemental analysis (CHN) was performed by the University of Nottingham, School of Chemistry Microanalytical Service on an Exeter Analytical CE- 440 instrument.

The band gap was calculated from the onset of the optical absorption of the film using the equation:  $E_g = 1240 / \lambda_{\text{onset}}$  [eV].

For PhOMeDPP *N*-Hex and PhOBocDPP *N*-Boc, single crystals were selected and mounted using Fomblin® (YR-1800 perfluoropolyether oil) on a polymer-tipped MiTeGen MicroMount™ and cooled rapidly to 120 K in a stream of cold N<sub>2</sub> using an Oxford Cryosystems open flow cryostat.<sup>1</sup> Single crystal X-ray diffraction data were collected on an Oxford Diffraction GV1000 (AtlasS2 CCD area detector, mirror-monochromated Cu-K $\alpha$  radiation source;  $\lambda = 1.54184$  Å,  $\omega$  scans). Cell parameters were refined from the observed positions of all strong reflections and absorption corrections were applied using a Gaussian numerical method with beam profile correction (CrysAlisPro).<sup>2</sup> Structures were solved within Olex2<sup>3</sup> by dual space iterative methods (SHELXT)<sup>4</sup> and all non-hydrogen atoms refined by full-matrix least-squares on all unique F<sup>2</sup> values with anisotropic displacement parameters (SHELXL).<sup>5</sup> Hydrogen atoms were refined with constrained geometries and riding thermal parameters. Structures were checked with checkCIF.<sup>6</sup> CCDC-2005929 and 2005925 contains the supplementary data for these compounds. This data can be obtained free of charge from The Cambridge Crystallographic Data Centre via [www.ccdc.cam.ac.uk/data\\_request/cif](http://www.ccdc.cam.ac.uk/data_request/cif). For PhOMeDPP *N*-Boc X-ray diffraction measurements were performed in Experiments Hutch 1 (EH1) of Beamline I19, at Diamond Light Source.<sup>7</sup> The data were collected at a wavelength of 0.6889 Å on a Fluid Film Devices 3-circle fixed-chi diffractometer using a Dectris Pilatus 2M detector. The crystal was mounted on a MiTeGen MicroMount™ using a perfluoropolyether oil, and cooled for data collection by a Cryostream nitrogen-gas stream.<sup>1</sup> The collected frames were integrated using XIA26 software<sup>8</sup> and the data were

corrected for absorption effects using AIMLESS,<sup>9</sup> an empirical method. Structures were solved within Olex2<sup>3</sup> by dual space iterative methods (SHELXT)<sup>4</sup> and all non-hydrogen atoms refined by full-matrix least-squares on all unique F<sup>2</sup> values with anisotropic displacement parameters (SHELXL).<sup>5</sup> Hydrogen atoms were refined with constrained geometries and riding thermal parameters. The terminal OMe group is disordered over two positions. The occupancies of the two components were refined competitively, converging to a ratio of 0.51:0.49. Structures were checked with checkCIF.<sup>6</sup> CCDC-2005924 contains the supplementary data for these compounds. This data can be obtained free of charge from The Cambridge Crystallographic Data Centre via [www.ccdc.cam.ac.uk/data\\_request/cif](http://www.ccdc.cam.ac.uk/data_request/cif). For PhOHDPP *N*-Hex, a single crystal was selected and mounted using Fomblin<sup>®</sup> (YR-1800 perfluoropolyether oil) on a polymer-tipped MiTeGen MicroMount<sup>TM</sup> and cooled rapidly to 120 K in a stream of cold N<sub>2</sub> using an Oxford Cryosystems open flow cryostat.<sup>1</sup> Single crystal X-ray diffraction data was collected on an Oxford Diffraction GV1000 (TitanS2 CCD area detector, mirror-monochromated Cu-K $\alpha$  radiation source;  $\lambda = 1.54184 \text{ \AA}$ ,  $\omega$  scans). Cell parameters were refined from the observed positions of all strong reflections and absorption corrections were applied using a Gaussian numerical method with beam profile correction (CrysAlisPro).<sup>2</sup> The structure was solved within Olex2<sup>3</sup> by dual space iterative methods (SHELXT)<sup>4</sup> and all non-hydrogen atoms refined by full-matrix least-squares on all unique F<sup>2</sup> values with anisotropic displacement parameters (SHELXL).<sup>5</sup> The structure was checked with checkCIF.<sup>6</sup> CCDC-2005927 contains the supplementary data for this compounds. This data can be obtained free of charge from The Cambridge Crystallographic Data Centre via [www.ccdc.cam.ac.uk/data\\_request/cif](http://www.ccdc.cam.ac.uk/data_request/cif). For PhOTHPDPP *N*-Hex and PhOMeDPP *N*-2MB, single crystals were selected and mounted using Fomblin<sup>®</sup> (YR-1800 perfluoropolyether oil) on a polymer-tipped MiTeGen MicroMount<sup>TM</sup> and cooled rapidly to 120 K in a stream of cold N<sub>2</sub> using an Oxford Cryosystems open flow cryostat.<sup>1</sup> Single crystal X-ray diffraction data were collected on an SuperNova Duo diffractometer (Atlas CCD area detector, mirror-monochromated Cu-K $\alpha$  radiation source;  $\lambda = 1.54184 \text{ \AA}$  or mirror-monochromated Mo-K $\alpha$  radiation source;  $\lambda = 0.71073 \text{ \AA}$ ;  $\omega$  scans). Cell parameters were refined from the observed positions of all strong reflections and absorption corrections were applied using a Gaussian numerical method with beam profile correction (CrysAlisPro).<sup>2</sup> Structures were solved within Olex2<sup>3</sup> by dual space iterative methods (SHELXT)<sup>4</sup> and all non-hydrogen atoms refined by full-matrix least-squares on all unique F<sup>2</sup> values with anisotropic displacement parameters (SHELXL).<sup>5</sup> For PhOTHPDPP *N*-Hex, conformational disorder is modelled for the hexyl and phenol-tetrahydropyran moieties. Large quantities of restraints have been applied to the geometries and displacement parameters of these two regions of disorder to aid refinement of sensible models. The hexyl chain is disordered over two overlapping conformations, the occupancies of which have been refined and constrained to sum to unity resulting in values of 0.68(1) and 0.32(1).

The phenol-tetrahydropyran moiety is disordered between two overlapping diastereomeric conformations of the group. The occupancies of these conformations are refined and constrained to sum to unity resulting in values of 0.85(1) and 0.15(1). The molecule lies on a two-fold symmetry element meaning that all three possible diastereomers R,R S,S and R,S are likely to be present in the crystal, and in unequal amounts. The atoms of the minor occupancy disorder component of the phenol-tetrahydropyran moiety are modelled with isotropic displacement parameters; all other non-hydrogen atoms are modelled anisotropically. Rigid bond and similarity restraints have been applied to the displacement parameters of the disordered atoms. The geometries of the disorder components have been restrained to have similar geometries (SAME, SADI). The phenol ring systems are restrained to have planar geometries and planar connections to the adjacent atoms (FLAT). The C-C bond length of the terminal two carbon atoms in both disorder components are restrained to a target value of 1.5 Å (DFIX). All hydrogen atoms were geometrically placed and refined using a riding model. The structures were checked with checkCIF.<sup>6</sup> CCDC-2005930 and 2005928 contains the supplementary data for this compounds. This data can be obtained free of charge from The Cambridge Crystallographic Data Centre via [www.ccdc.cam.ac.uk/data\\_request/cif](http://www.ccdc.cam.ac.uk/data_request/cif). For PhOHDPP *N*--2MB, a single crystal was selected and mounted using Fomblin<sup>®</sup> (YR-1800 perfluoropolyether oil) on a polymer-tipped MiTeGen MicroMount<sup>TM</sup> and cooled rapidly to 120 K in a stream of cold N<sub>2</sub> using an Oxford Cryosystems open flow cryostat.<sup>1</sup> Single crystal X-ray diffraction data were collected on an XtaLAB PRO MM007 (PILATUS3 R 200K Hybrid Pixel Array detector, mirror-monochromated Cu-K $\alpha$  radiation source;  $\lambda$  = 1.54184 Å,  $\omega$  scans). Cell parameters were refined from the observed positions of all strong reflections and absorption corrections were applied using a Gaussian numerical method with beam profile correction (CrysAlisPro).<sup>2</sup> The structure was solved within Olex2<sup>3</sup> by dual space iterative methods (SHELXT)<sup>4</sup> least squares refinement of the structure was carried using (SHELXL).<sup>5</sup> Structures were checked with checkCIF.<sup>6</sup> CCDC-2005926 contains the supplementary data for these compounds. These data can be obtained free of charge from The Cambridge Crystallographic Data Centre via [www.ccdc.cam.ac.uk/data\\_request/cif](http://www.ccdc.cam.ac.uk/data_request/cif).

UV/Vis absorption studies were performed using a Cary 5000 UV-Vis-NIR Absorption spectrometer. Emission studies were performed using an Edinburgh Instruments FLS980 Photoluminescence spectrometer. For quantum yield studies, fluorescence spectra were recorded as aerated solutions using a Jobin Yvon Horiba FluoroMax-3 spectrometer at ambient temperature in a 1cm pathlength quartz cuvette.

Quantum yields were calculated by comparison with the fluorescence observed for fluorescein (F = 91 in NaOH) under identical conditions of irradiation.<sup>10</sup> . Cyclic voltammetric studies were carried out using an Autolab PGSTAT20 potentiostat and in some cases an EmStat3 potentiostat. Standard cyclic

voltammetry was carried out under an atmosphere of argon using a three-electrode arrangement in a single compartment cell. A glassy carbon working electrode, a Pt wire secondary electrode and a saturated calomel reference electrode, chemically isolated from the test solution *via* a bridge tube containing electrolyte solution and fitted with a porous Vycor frit, were used in the cell when using the Autolab PGSTAT20 potentiostat. For the EmStat3 potentiostat a three electrode set up consisting of a platinum wire counter electrode, a platinum disc working electrode and a Ag/AgCl wire quasi reference electrode was used. Redox potentials are quoted versus the ferrocenium-ferrocene couple, which was used as an internal reference.<sup>11</sup> Acetonitrile was utilised as solvent for PhOMeDPP *N*-Hex, PhOMeDPP *N*-2MB and PhOTHPDPP *N*-Hex, dimethylformamide was used for PhOHDPP *N*-Hex and PhOHDPP *N*-2MB and dichloromethane for PhOMeDPP *N*-Boc and PhOBocDPP *N*-Boc. Tetrabutylammoniumhexafluorophosphate was employed as supporting electrolyte for all electrochemical experiments. HOMO and LUMO levels were calculated using the equations<sup>12</sup>:

$$E_{\text{HOMO}} = -(E_{\text{onset}}(\text{ox}) + 4.8 \text{ [eV]}) \text{ and } E_{\text{LUMO}} = -(E_{\text{onset}}(\text{red}) + 4.8 \text{ [eV]}).$$

The band gap is calculated using the equation

$$E_g = E_{\text{HOMO}} - E_{\text{LUMO}} \text{ [eV]}.$$

Alternatively, the band gap can also be calculated from the onset of the optical absorption of the film using the equation:

$$E_g = 1240 / \lambda_{\text{onset}} \text{ [eV]}.$$

Electronic structure calculations were performed using Gaussian 09.<sup>13</sup> Electronic coupling calculations used molecular geometries taken from the crystal structures and used the B3LYP exchange-correlation functional and 6-311G(d,p) basis set with an ultrafine integration grid. Calculations of reorganisation energies used the larger 6-311+(d,p) basis set, with alkyl groups replaced with methyl to speed up geometry optimisation. Coupling values were calculated by 3 different methods (DIPRO,<sup>14</sup> monomer projection<sup>15</sup> and Fock matrix),<sup>16</sup> which all provided comparable values. Mobilities were calculated using a sum-over-neighbours approach using rate constants derived from Marcus theory.<sup>17</sup>

## PhOMeDPP *N*-H

### 3,6-Bis(4-methoxyphenyl)-2,5-dihydropyrrolo[3,4-*c*]pyrrole-1,4-dione

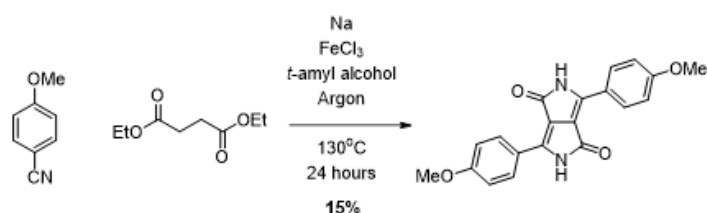

Sodium (8.75g, 0.380 mol) and a catalytic amount of iron chloride were added to anhydrous *t*-amyl alcohol (170 ml, 2.40 mol) and the mixture was heated at 120°C for 1 hour under an argon atmosphere, whilst stirring until all the sodium had dissolved. The solution was then cooled to around 80°C and 4-methoxybenzonitrile (25.0g, 0.188 mol) added. The reaction was then heated slowly to 130°C and once it had reached this temperature, a solution of diethyl succinate (16.0 ml, 96.1 mmol) in *t*-amyl alcohol (42.5 ml, 0.388 mol) was added via syringe pump over 3 hours. Once added, the reaction was heated at 130°C overnight. Upon completion, the reaction mixture was cooled to 50°C and glacial acetic acid (100 ml, 1.75 mol) added and the solution was heated at reflux for 1 hour. The solid was separated by filtration (No. 4 porosity glass sinter), washed with hot methanol and dried in vacuo to afford the known product as a red solid (9.40 g, 2.70 mol, 14.5%), which had the following data in agreement with the literature<sup>18,19</sup>: Mp: >250 °C;  $\nu$  max (ATR-IR) 3125 (NH stretch), 3086 (CH stretch), 3018 (CH stretch), 2983 (CH stretch), 2855 (CH stretch), 1634 (C=O), 1594 (C=C stretch), 1512, 1446, 1339, 1304, 1267, 1189, 1147, 1022, 946, 911, 865, 830, 754, 628, 602, 501 cm<sup>-1</sup>; <sup>1</sup>H NMR (400 MHz, DMSO-*d*<sub>6</sub>)  $\delta$  11.17 (2H, bs, NH), 8.46-8.44 (4H, m, ArH), 7.14-7.11 (4H, m, ArH), 3.85 (6H, s, OMe) ppm;

#### General synthesis route for *N*-alkylation of PhOMeDPP *N*-H

3,6-Bis(4-methoxyphenyl)-2,5-dihydropyrrolo[3,4-*c*]pyrrole-1,4-dione (500 mg, 1.44 mmol) was added to caesium carbonate (2 g, 6.14 mmol) and alkyl halide (6.24 mmol) in anhydrous acetonitrile (20 ml) and the mixture was heated to 85°C, whilst stirring under an inert atmosphere for 24 hours. The solvent was then removed under reduced pressure. Dichloromethane (100 ml) was added and the remaining unreacted starting material filtered off using a No. 4 porosity glass sintered crucible. The solution was washed with water (200 ml), the organic phase was separated and the aqueous phase was washed with dichloromethane (2 x 100 ml). The organic extracts were combined and dried (MgSO<sub>4</sub>). The solution was filtered, and concentrated under reduced pressure. The crude product was purified by column chromatography using an eluent system of 95:5 CH<sub>2</sub>Cl<sub>2</sub>: ethyl acetate to yield the pure product.

## PhOMeDPP *N*-2MB

### 3,6-Bis(4-methoxyphenyl)-2,5-bis((*S*)-2-methylbutyl)-2,5-dihydropyrrolo[3,4-*c*]pyrrole-1,4-dione

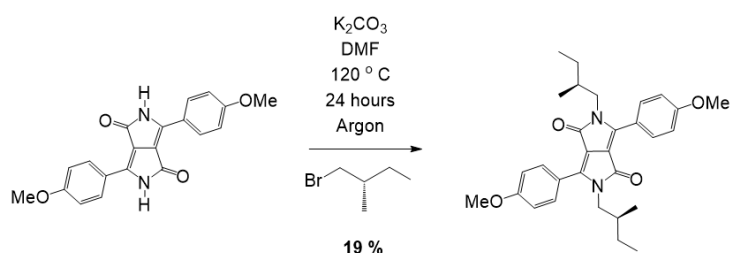

The compound was synthesised using the general method for *N*-alkylation of PhOMeDPP *N*-H using (*S*)-(+)-1-bromo-2-methylbutane as alkyl halide to yield the product as an orange crystalline solid (133 mg, 0.273 mmol, 19%). The product is novel and has: Mp: 222°C; (ESI-MS): Found [M+ H]<sup>+</sup> 489.2754 and C<sub>30</sub>H<sub>37</sub>N<sub>2</sub>O<sub>4</sub> requires 489.2748;  $\nu$  max (ATR-IR) 3073 (CH stretch), 3010 (CH stretch), 2954 (CH stretch), 1660 (C=O), 1601(C=C stretch), 1564, 1508, 1456, 1419, 1349, 1304, 1257, 1176, 1123, 1084, 1026, 966, 917, 871, 836, 791, 735, 653, 595, 527, 478 cm<sup>-1</sup>; <sup>1</sup>H NMR (300 MHz, CDCl<sub>3</sub>)  $\delta$  7.80 (4H, d, J 8.5 Hz, ArH), 7.03 (4H, d, J 8.5 Hz, ArH), 3.89 (6H, s, OMe), 3.81-3.64 (4 H, m, NCH<sub>2</sub>), 1.70-1.60 (2 H, m, CH), 1.35-0.98 (4 H, m, CH<sub>2</sub>), 0.81-0.73 (12 H, m, RCH<sub>3</sub>) ppm; <sup>13</sup>C NMR (75MHz, CDCl<sub>3</sub>)  $\delta$  163.0, 161.6, 147.9, 130.5, 121.1, 114.2, 110.0, 55.4, 47.7, 34.5, 26.9, 16.8, 11.1 ppm; Elemental analysis: calcd for C<sub>30</sub>H<sub>37</sub>N<sub>2</sub>O<sub>4</sub>: C, 73.74; H, 7.43; N, 5.73%; found: C, 72.8; H, 7.42; N, 5.64%

## PhOMeDPP *N*-Hex

### 2,5-Dihexyl-3,6-bis(4-methoxyphenyl)-2,5-dihydropyrrolo[3,4-*c*]pyrrole-1,4-dione

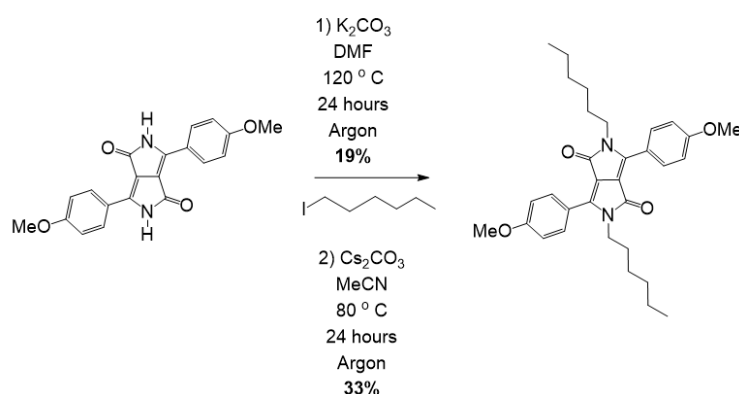

The compound was synthesised using the general method for *N*-alkylation of PhOMeDPP *N*-H using hexyl iodide as alkyl halide to yield the product as an orange solid (250 mg, 0.484  $\mu$ mol, 34%). This compound is known<sup>18</sup> and the <sup>1</sup>H NMR is in agreement with the literature, but it is not fully characterised. The compound has: Mp: 163°C; ESI-MS found: [M+ H]<sup>+</sup> 517.3072 and C<sub>32</sub>H<sub>41</sub>N<sub>2</sub>O<sub>4</sub> requires M 517.3061;  $\nu$  max (ATR-IR) 3067 (CH stretch), 3010(CH stretch), 2962(CH stretch), 2927(CH stretch), 2855(CH stretch), 1666 (C=O), 1607 (C=C stretch), 1566, 1506, 1454, 1380, 1341, 1304, 1255, 1178, 1119, 1084, 1024, 962, 836, 781, 737, 655, 587, 538, 507, 478, 420 cm<sup>-1</sup>; <sup>1</sup>H NMR (300 MHz, CDCl<sub>3</sub>)  $\delta$  7.85 (4 H, d, J 9.0 Hz, ArH), 7.06 (4 H, d, J 9.0 Hz, ArH), 3.91 (6 H, s, OMe), 3.78 (4 H, t, J 6.0 Hz, NCH<sub>2</sub>), 1.68-1.59 (4 H, m, CH<sub>2</sub>), 1.28-1.22 (12 H, m, CH<sub>2</sub>), 0.86 (6 H, t, J 6.0 Hz, Me) ppm; <sup>13</sup>C NMR (75MHz, CDCl<sub>3</sub>)  $\delta$  162.9, 161.7, 147.7, 130.6, 120.8, 114.4, 108.9, 55.5, 42.1, 31.3, 29.5, 26.5, 22.5, 14.0 ppm; Elemental analysis: calcd for C<sub>32</sub>H<sub>41</sub>N<sub>2</sub>O<sub>4</sub>: C, 74.39; H, 7.80; N, 5.42%; found: C, 74.21; H, 7.79; N, 5.42%.

## PhOMeDPP N-Boc

### Di-*tert*-butyl 3,6-bis(4-methoxyphenyl)-1,4-dioxopyrrolo[3,4-*c*]pyrrole-2,5(1H,4H)-dicarboxylate

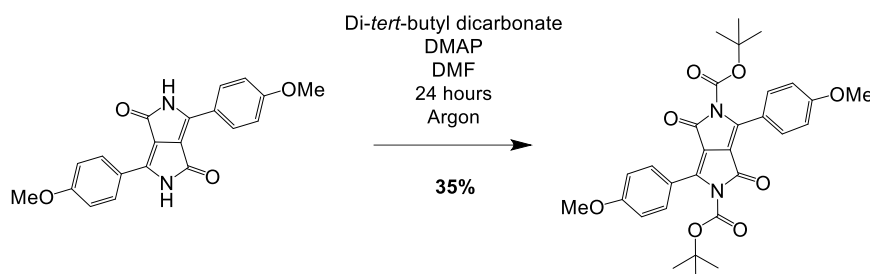

3,6-Bis(4-methoxyphenyl)-2,5-dihydropyrrolo[3,4-*c*]pyrrole-1,4-dione (1.0g, 2.9 mmol), di-*tert*-butyldicarbonate (1.25g, 5.44mmol) and 4-dimethylaminopyridine (0.70g, 5.73 mmol) were dissolved in anhydrous DMF (50 ml) and the mixture was stirred at room temperature under an inert atmosphere for 24 hours. Once this time had elapsed, the reaction mixture was washed with water (200 ml) and the solution was filtered (No. 4 porosity glass sinter), to remove unreacted starting material. The excess solvent was removed under reduced pressure. The crude product was then purified by column chromatography using an eluent system of 95:5 petroleum ether: ethyl acetate to yield the pure product a yellow solid (560mg, 1.02 mmol, 35 %). The product is novel and has: Mp: decomposed 120° C ; ESI-MS found:  $[M+H]^+$  549.2247 and  $C_{30}H_{33}N_2O_8$  requires M 549.2231;  $\nu_{max}$  (ATR-IR) 3073 (CH stretch), 2989(CH stretch), 2933 (CH stretch), 1747(C=O), 1708(C=O DPP), 1625 (C=C stretch), 1599, 1508, 1461, 1370, 1257, 1207, 1178, 1141, 1053, 1024, 876, 834, 766, 733, 661, 608, 550, 513, 484  $cm^{-1}$ ;  $^1H$  NMR (400 MHz,  $CDCl_3$ )  $\delta$  7.76 (4 H, d, *J* 8.0 Hz, ArH), 6.99 (4 H, d, *J* 8.0 Hz, ArH), 3.88 (6 H, s, OMe), 1.47 (18 H, s, Me) ppm;  $^{13}C$  NMR (75MHz,  $CDCl_3$ )  $\delta$  162.2, 159.8, 148.6, 145.3, 130.5, 120.7, 113.9, 111.0, 102.0, 85.0, 55.5, 27.6 ppm

## PhOTHPDPP N-H

### 3,6-Bis(4-((tetrahydro-2H-pyran-2-yl)oxy)phenyl)-2,5-dihydropyrrolo[3,4-*c*]pyrrole-1,4-dione

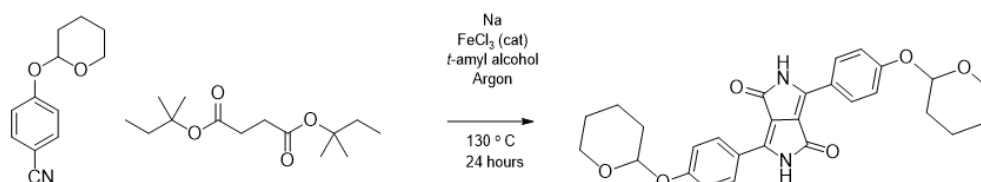

Sodium (3.92 g, 1.70 mol) and a catalytic amount of iron chloride were added to anhydrous *t*-amyl alcohol (112 ml, 1.02 mol) and heated at 120°C for 1 hour, under an argon atmosphere, whilst stirring, until all the sodium had dissolved. The solution was then cooled to around 80°C and 4-((tetrahydro-2-pyran-2H-yloxy) benzonitrile (17.3 g, 8.46 mol)<sup>20</sup> added. The reaction was then heated slowly to 130 °C and once it had reached this temperature a solution of di-*tert* amyl succinate (10.5 ml, 4.79 mmol) in *t*-amyl alcohol (28.0 ml, 0.256 mol) was added *via* syringe pump over 3 hours. The reaction was heated at 130°C overnight. Upon completion, the reaction mixture was cooled and hot methanol added. The solid was separated by filtration(No. 4 porosity glass sinter) and washed with hot methanol and dried in vacuo to afford the pure product as a red solid (11.9 g, 2.43 mmol, 28.7 %). This compound is known<sup>20</sup> ;  $^1H$  NMR (400 MHz,  $DMSO-d_6$ )  $\delta$  11.11 (2H, s, NH), 8.43 (4H, d, *J* 7.8 Hz, ArH), 7.17 (4H, d, *J* 7.8 Hz, ArH), 5.63 (2H, m, OCH), 3.79-3.69 (2H, m, OCH), 3.64 – 3.56 (2H, m, OCH), 1.95-1.48 (12H, m, CH and  $CH_2$ ) ppm



## PhOTHPDPP *N*-Hex

### 2,5-Dihexyl-3,6-bis(4-((tetrahydro-2H-pyran-2-yl)oxy)phenyl)-2,5-dihydropyrrolo[3,4-c]pyrrole-1,4-dione

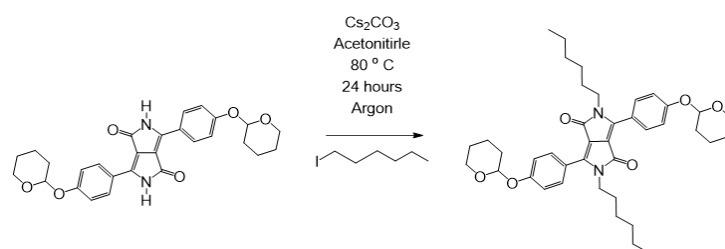

3,6-Bis(4-((tetrahydro-2H-pyran-2-yl)oxy)phenyl)-2,5-dihydropyrrolo[3,4-c]pyrrole-1,4-dione (500 mg, 1.02 mmol) was added to a mixture of caesium carbonate (1.42 g, 4.35 mmol) and hexyl iodide (0.94 g, 4.42 mmol) in anhydrous acetonitrile (20 ml) and the reaction mixture was heated to 85°C, whilst stirring under an inert atmosphere for 24 hours. The mixture was then evaporated to dryness under reduced pressure. Dichloromethane (100 ml) was added and unreacted starting material filtered off (No. 4 porosity glass sinter). The solution was washed with water (200 ml), the organic phase was separated and the aqueous phase was washed with dichloromethane (2 x 100 ml). The organic extracts were combined and dried (MgSO<sub>4</sub>). The solution was filtered and concentrated under reduced pressure. The crude product was purified by column chromatography using an eluent system of 95:5 DCM: ethyl acetate to yield the pure product as an orange crystalline solid (121 mg, 0.18 mmol, 18%). This compound is novel and has: Mp: 144°C; ESI-MS found: [M+Na]<sup>+</sup> 679.3715 and C<sub>40</sub>H<sub>52</sub>N<sub>2</sub>O<sub>6</sub>Na requires M 679.3718; ν<sub>max</sub> (ATR-IR) 2931 (CH stretch), 2855 (CH stretch), 1765 (C=O), 1739 (C=C stretch), 1660, 1609, 1508, 1454, 1358, 1279, 1242, 1201, 1176, 1088, 1036, 958, 919, 847, 764, 737, 655, 630, 603, 562, 538, 499, 470 cm<sup>-1</sup>; <sup>1</sup>H NMR (300 MHz, CDCl<sub>3</sub>) δ 7.80 (4H, d, *J* 8.9 Hz, ArH), 7.18 (4H, d, *J* 8.9 Hz, ArH), 5.51 (2H, t, *J* 3.1 Hz, OCH), 3.90 (2H, ddd, *J* = 12.4, 9.6, 3.0 Hz, OCH), 3.79 – 3.71 (4H, m, NCH<sub>2</sub>), 3.67 – 3.59 (2H, m, OCH), 2.07 – 1.95 (2H, m, CH), 1.94 – 1.83 (4H, m, CH<sub>2</sub>), 1.77 – 1.57 (10H, m, CH and CH<sub>2</sub>), 1.31 – 1.17 (12H, m, CH<sub>2</sub>), 0.87 – 0.79 (6H, m, CH<sub>3</sub>) ppm; <sup>13</sup>C NMR (75 MHz, CDCl<sub>3</sub>) δ 163.1, 159.4, 147.9, 130.6, 121.6, 116.7, 109.1, 96.4, 62.3, 42.2, 31.4, 30.4, 29.6, 26.6, 25.3, 22.6, 18.8, 14.1 ppm.

#### General synthesis of PhOHDPP *N*-R by deprotection of PhOMeDPP *N*-R

3,6-Bis(4-methoxyphenyl)-2,5-bis((*S*)-2-methylbutyl)-2,5-dihydropyrrolo[3,4-c]pyrrole-1,4-dione (100 mg, 0.20 mmol) was dissolved in dichloromethane (5 ml) and the solution was cooled to -20°C whilst stirring under an argon atmosphere. Once this temperature had been reached, a solution of boron tribromide (0.1 ml, 1.05 mmol) in dichloromethane (3 ml) was added dropwise and the reaction mixture was allowed to warm to room temperature, continuing stirring for 24 hours. Upon completion, the reaction mixture was quenched with water (20 ml) and an orange solid precipitated. The solid was separated by filtration (No. 4 porosity glass sinter) and washed with 10 % sodium hydroxide (10 ml) and 2M hydrochloric acid (10 ml) and dried in vacuo to yield the pure product

### PhOHDPP N-Hex

#### 2,5-Dihexyl-3,6-bis(4-hydroxyphenyl)-2,5-dihydropyrrolo[3,4-c]pyrrole-1,4-dione

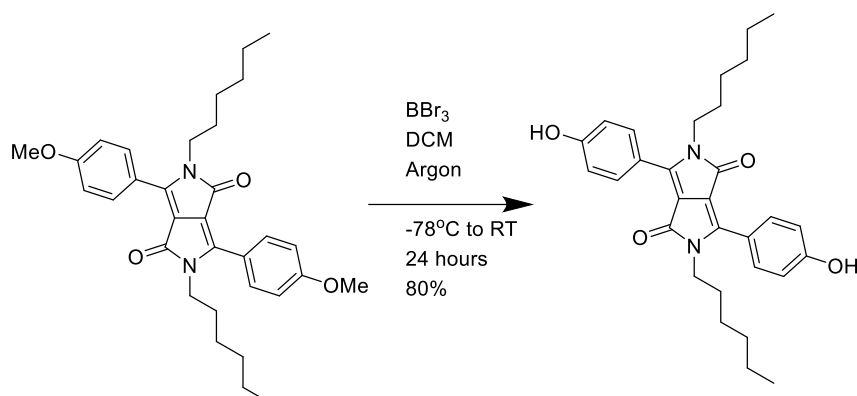

The compound was synthesised using the general method for deprotection of **PhOMeDPP N-R** to yield the pure product as a red solid (75mg, 0.15 mmol, 81%). This compound is known<sup>18</sup> and the <sup>1</sup>H NMR is in agreement with the literature but it is not fully characterised. The compound has: Mp: 225°C; ESI-MS found: [M- H]<sup>-</sup> 487.2717 and C<sub>30</sub>H<sub>35</sub>N<sub>2</sub>O<sub>4</sub> requires M 487.2675;  $\nu$  max (ATR-IR) 3187 (OH stretch), 3024 (CH stretch), 2917 (CH stretch), 2851 (CH stretch), 2746 (CH stretch), 2678 (CH stretch), 1664 (C=O), 1592 (C=C stretch), 1514, 1444, 1374, 1277, 1232, 1178, 1098, 1005, 960, 892, 843, 764, 705, 647, 595, 521, 490, 447 cm<sup>-1</sup>; <sup>1</sup>H NMR (300 MHz, DMSO-*d*<sub>6</sub>)  $\delta$  10.29 (2H, s, Ar-OH), 7.73 (4 H, d, *J* 8.7 Hz, ArH), 6.93 (4 H, d, *J* 8.7 Hz, ArH), 3.71 (4 H, t, *J* 7.0 Hz, NCH<sub>2</sub>), 1.45-1.40 (4 H, m, CH<sub>2</sub>), 1.18-1.13 (12 H, m, CH<sub>2</sub>), 0.79 (6 H, t, *J* 7.0 Hz, Me) ppm; <sup>13</sup>C NMR (75 MHz, DMSO-*d*<sub>6</sub>)  $\delta$  161.8, 160.2, 147.1, 130.6, 118.63, 115.6, 107.3, 48.5, 30.5, 28.4, 25.6, 21.8, 13.8 ppm;

### PhOHDPP N-2MB

#### 3,6-Bis(4-hydroxyphenyl)-2,5-bis((S)-2-methylbutyl)-2,5-dihydropyrrolo[3,4-c]pyrrole-1,4-dione

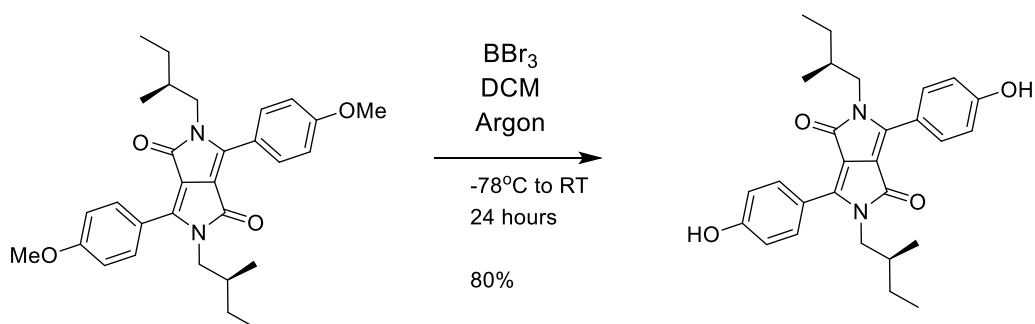

The compound was synthesised using the general method for deprotection of **PhOMeDPP N-R** to yield the pure product as a red solid (74 mg, 0.16 mmol, 80%). The product is novel and has: Mp: >250°C; ESI-MS found: [M+ H]<sup>+</sup> 461.2452 and C<sub>30</sub>H<sub>33</sub>N<sub>2</sub>O<sub>4</sub> requires M 461.2435;  $\nu$  max (ATR-IR) 3232 (OH stretch), 3180 (CH stretch), 2962 (CH stretch), 2876 (CH stretch), 1640 (C=O), 1588 (C=C stretch), 1514, 1444, 1378, 1347, 1275, 1230, 1174, 1094, 970, 917, 840, 740, 639, 593, 521, 439 cm<sup>-1</sup>; <sup>1</sup>H NMR (300 MHz, DMSO-*d*<sub>6</sub>)  $\delta$  10.26 (2H, s, Ar-OH) 7.76 (4 H, d, *J* 8.8 Hz, ArH), 6.93 (4 H, d, *J* 8.8 Hz, ArH), 3.78-3.59 (4 H, m, NCH<sub>2</sub>), 1.47-1.41 (2H, m, CH), 1.25-0.96 (4 H, m, CH<sub>2</sub>), 0.73-0.63 (12 H, m, Me) ppm; <sup>13</sup>C NMR (75 MHz, DMSO-*d*<sub>6</sub>)  $\delta$  162.0, 160.0, 147.3, 130.6, 118.9, 115.6, 107.4, 46.1, 33.9, 26.3, 16.6, 10.8 ppm

## PhOHDPDP N-H

### 3,6-Bis(4-hydroxyphenyl)-2,5-dihydropyrrolo[3,4-c]pyrrole-1,4-dione

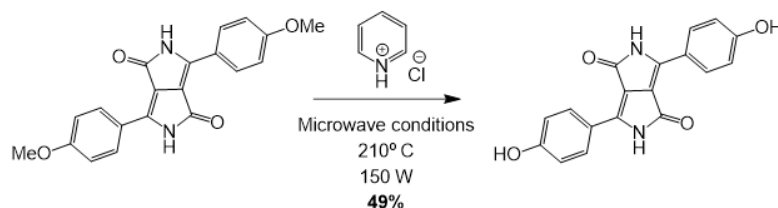

3,6-Bis(4-methoxyphenyl)-2,5-dihydropyrrolo[3,4-c]pyrrole-1,4-dione (500 mg, 1.44 mmol) and pyridinium hydrochloride (500 mg, 4.3 mmol) were degassed in a microwave vial. The vial was then heated (210°C) and stirred under microwave irradiation (150 W) for 15 minutes then cooled and held at 160 °C for 5 minutes. The cycle was then repeated. The progress of the reaction was monitored between cycles by <sup>1</sup>H NMR until no starting material remained. Typically, 3 cycles were sufficient to ensure complete conversion. The desired material was produced in good yield after washing with water and CH<sub>2</sub>Cl<sub>2</sub> to yield the pure product as a red solid (225 mg, 0.70 mmol, 49%). This compound is known<sup>20</sup> and the <sup>1</sup>H NMR is in agreement with the literature but it is not fully characterised. The compound has Mp: >250°C; MALDI-TOF MS found M 320.119 and C<sub>18</sub>H<sub>12</sub>N<sub>2</sub>O<sub>4</sub> requires M 320.0797; ν<sub>Max</sub> (ATR-IR) 3102 (v.broad OH stretch), 3045 (v.broad NH stretch), 2958 (CH stretch), 2929 (CH stretch), 2839 (CH stretch), 2775 (CH stretch), 1636 (C=O), 1578 (C=C stretch), 1512, 1454, 1432, 1384, 1333, 1283, 1246, 1187, 1143, 1106, 1034, 948, 876, 838, 793, 756, 670, 630, 604, 509, 461 cm<sup>-1</sup>; <sup>1</sup>H NMR (400 MHz, DMSO-*d*<sub>6</sub>) δ 11.01 (2 H, s, NH), 10.36 (2H, s, OH), 8.35 (4H, d, *J* 8 Hz, ArH), 6.90 (4H, d, *J* 8 Hz, ArH) ppm; <sup>13</sup>C NMR (100 MHz, DMSO-*d*<sub>6</sub>) δ 162.5, 160.7, 143.0, 129.9, 119.2, 115.8, 108.4 ppm;

## PhOBocDPP N-Boc

### Di-*tert*-butyl 3,6-bis(4-((*tert*-butoxycarbonyl)oxy)phenyl)-1,4-dioxopyrrolo[3,4-c]pyrrole-2,5(1H,4H)-dicarboxylate

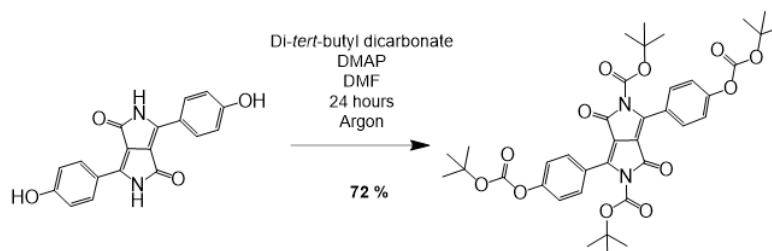

3,6-Bis(4-hydroxyphenyl)-2,5-dihydropyrrolo[3,4-c]pyrrole-1,4-dione (0.65g, 2.03 mmol), di-*tert*-butyldicarbonate (2.09 g, 9.58 mmol) and 4-dimethylaminopyridine (0.2 g, 1.64 mmol) were dissolved in anhydrous DMF (50 ml) and the solution was stirred at room temperature, under an argon atmosphere. Once this time had elapsed, the reaction mixture was washed with water (200 ml) and the solution was filtered (No. 4 porosity glass sinter) to remove unreacted starting material. The solvent was removed under reduced pressure. The crude product was then purified by column chromatography, using an eluent system of 95:5 petroleum ether: ethyl acetate, to yield the pure product an orange solid (1.05 g, 1.46 mmol, 72 %). The product is novel and has: Mp: 190°C; ESI-MS found: [M+Na]<sup>+</sup> 743.2763 and C<sub>38</sub>H<sub>44</sub>N<sub>2</sub>O<sub>12</sub>Na requires M 743.2786; ν<sub>max</sub> (ATR-IR) 2981(CH stretch), 1747 (C=O), 1708 (C=O DPP), 1621(C=C stretch), 1510, 1458, 1370, 1341, 1273, 1222, 1137, 1065, 956, 888, 836, 781, 744, 696, 659, 628, 564, 507, 476 cm<sup>-1</sup>; <sup>1</sup>H NMR (400 MHz, CDCl<sub>3</sub>) δ 7.78(4 H, d, *J* 8.9 Hz, ArH), 7.31 (4 H, d, *J* 8.9 Hz, ArH), 1.57 (18 H, s, O(Me)<sub>3</sub>), 1.42 (18 H, s, O(Me)<sub>3</sub>) ppm; <sup>13</sup>C NMR (100 MHz, CDCl<sub>3</sub>) δ 159.5, 153.5, 151.0, 148.1, 145.4, 130.1, 125.7, 121.4, 112.4, 85.6, 84.3, 27.8, 27.7 ppm

## 1. $^1\text{H}$ NMR Spectra

$^1\text{H}$  NMR spectrum of **PhOMeDPP N-H** in  $\text{D}_6\text{-DMSO}$

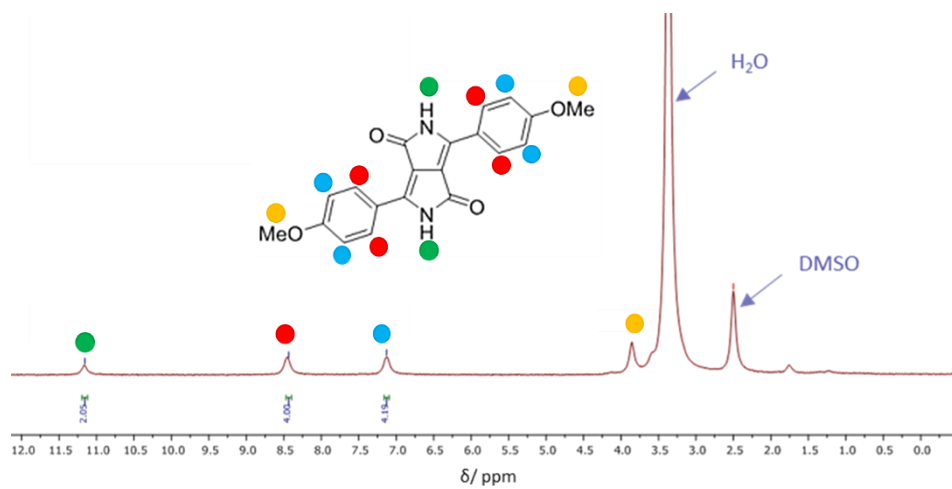

$^1\text{H}$  NMR spectrum of **PhOMeDPP N-2MB** in  $\text{CDCl}_3$

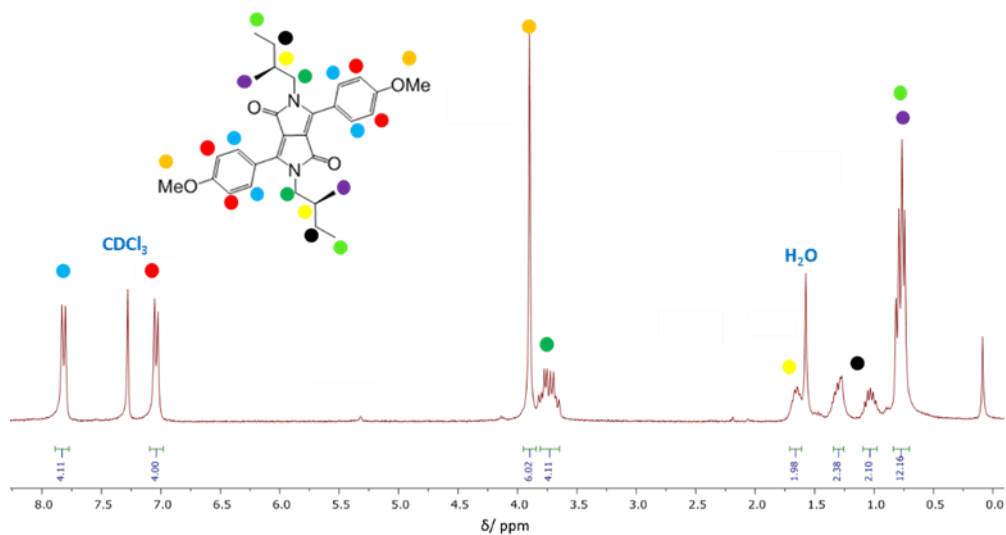

$^1\text{H}$  NMR spectrum of **PhOMeDPP N-Hex** in  $\text{CDCl}_3$

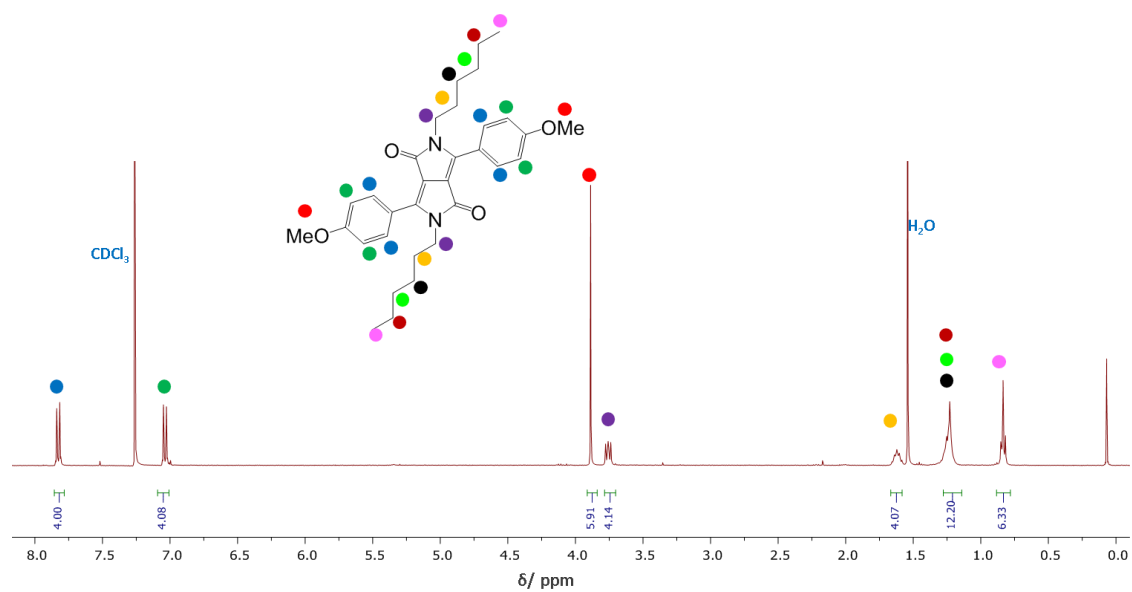

$^1\text{H}$  NMR spectrum of **PhOMeDPP N-Boc** in  $\text{CDCl}_3$

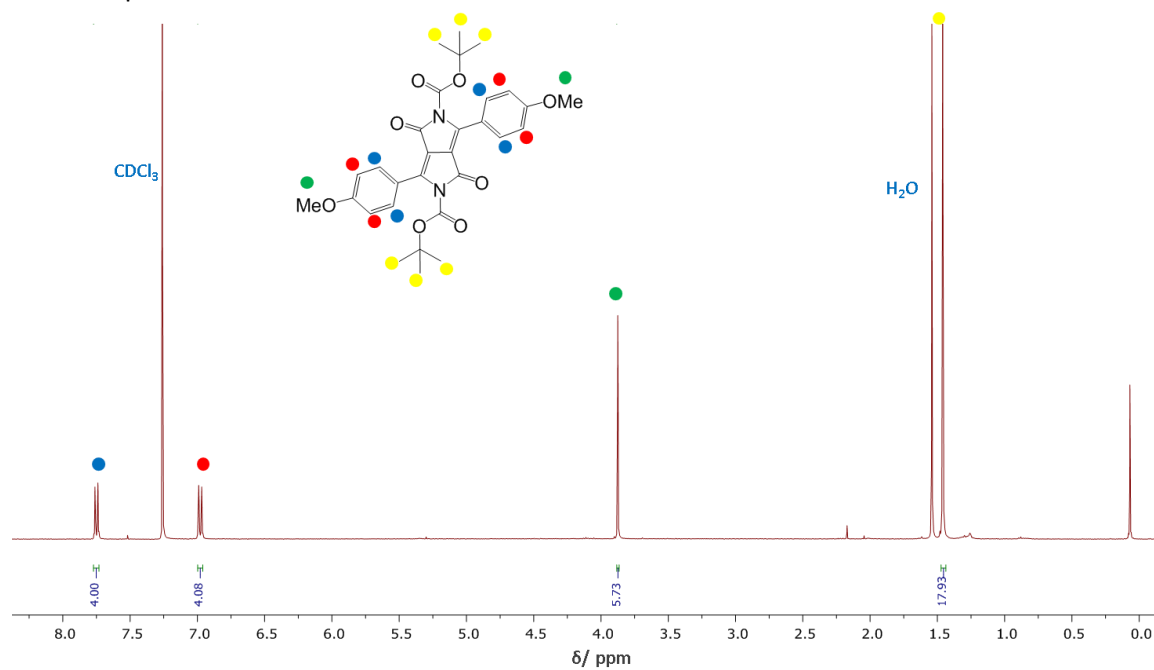

$^1\text{H}$  NMR spectrum of **PhOTHPDPP N-H** in  $\text{D}_6\text{-DMSO}$

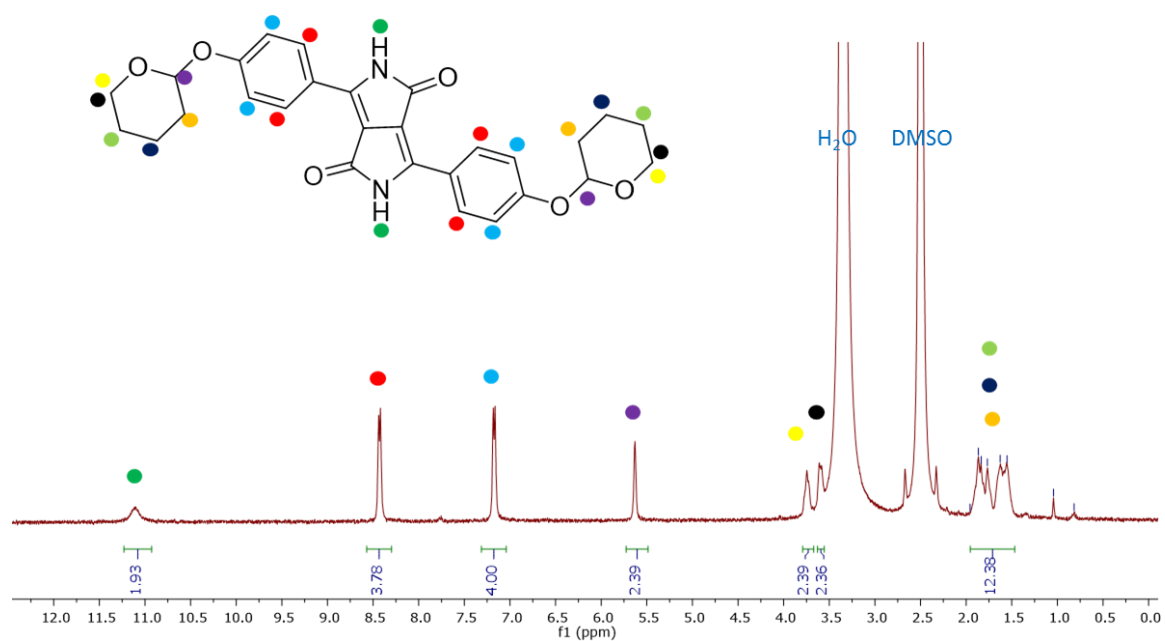

$^1\text{H}$  NMR spectrum of **PhOTHPDPP N-Hex** in  $\text{CDCl}_3$

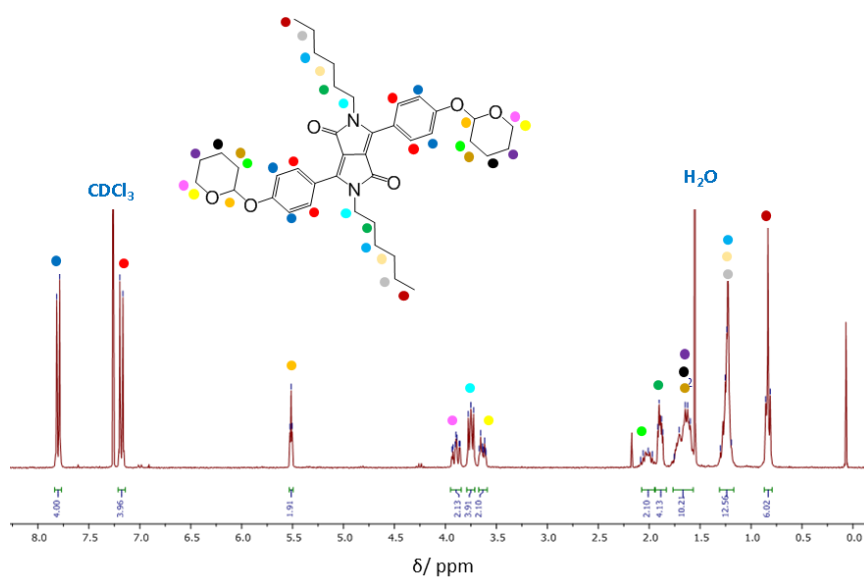

$^1\text{H}$  NMR spectrum of **PhOHDPP N-Hex** in  $\text{D}_6\text{-DMSO}$

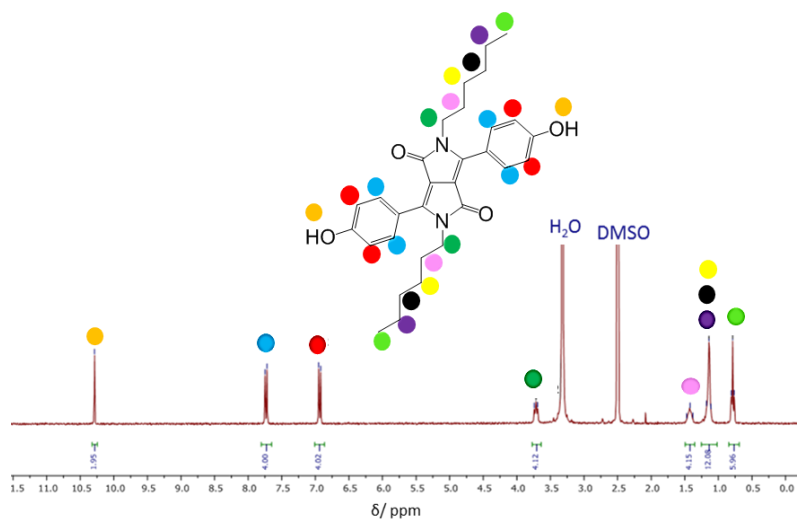

$^1\text{H}$  NMR spectrum of **PhOHDPP N-2MB** in  $\text{D}_6\text{-DMSO}$

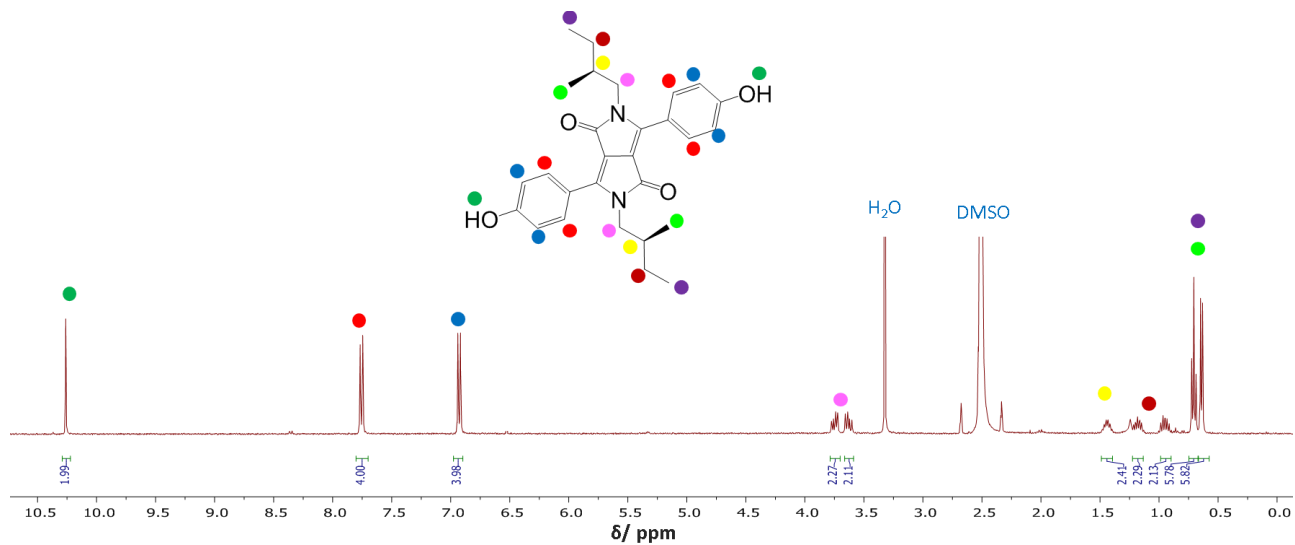

$^1\text{H}$  NMR spectrum of **PhOHDPP N-H** in  $\text{D}_6\text{-DMSO}$

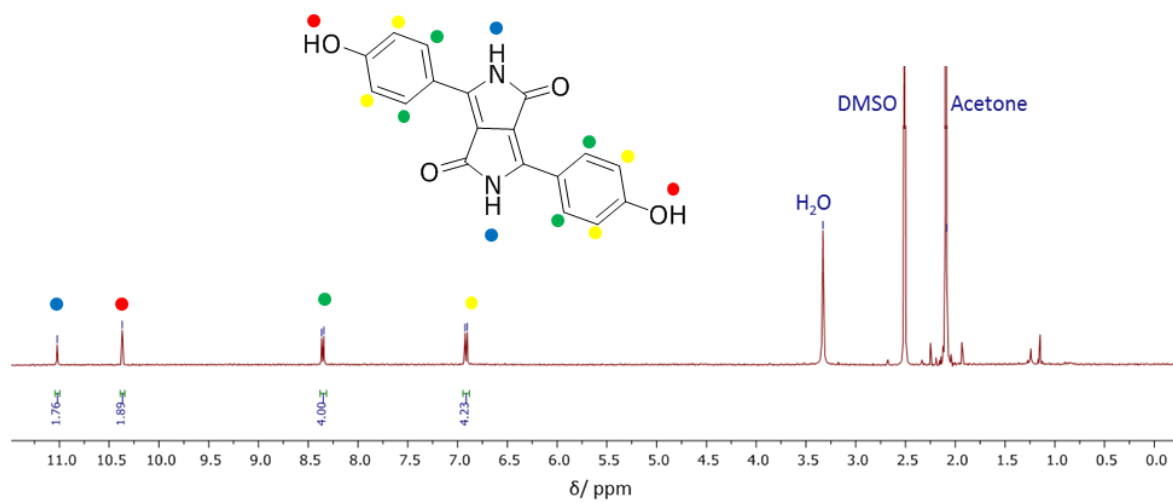

$^1\text{H}$  NMR spectrum of **PhOBocDPP *N*-Boc** in  $\text{CDCl}_3$

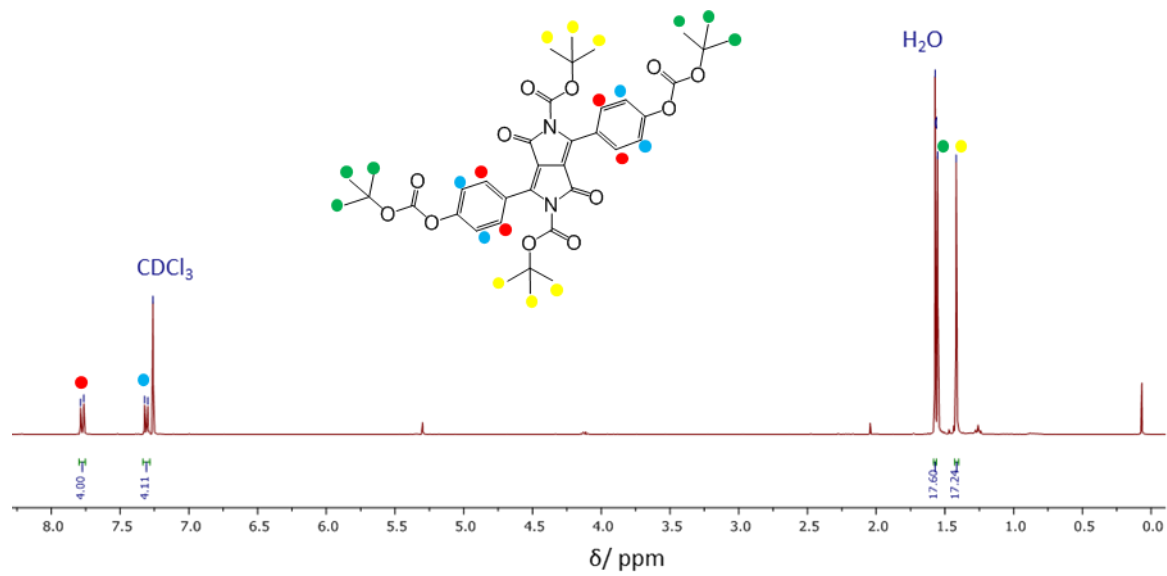



## 2. $^{13}\text{C}$ NMR Spectra

$^{13}\text{C}$  NMR spectrum of **PhOMeDPP N-2MB** in  $\text{CDCl}_3$

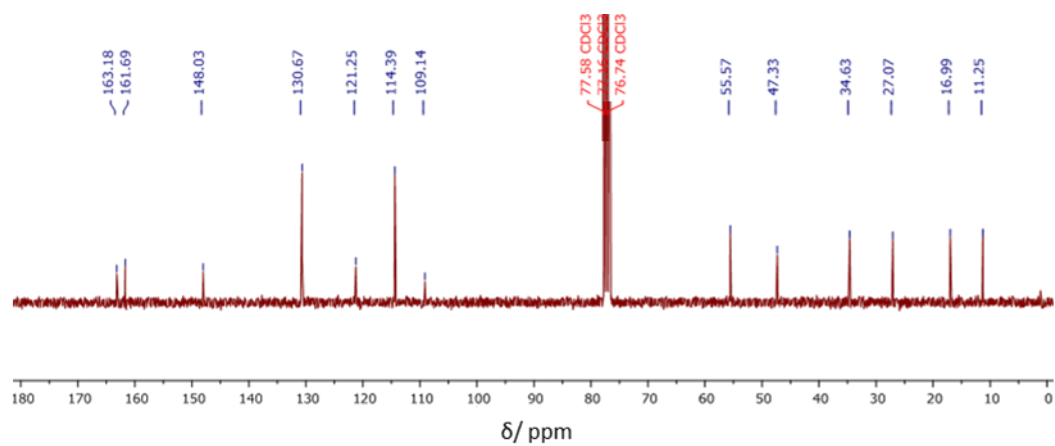

$^{13}\text{C}$  NMR spectrum of **PhOMeDPP N-Hex** in  $\text{CDCl}_3$

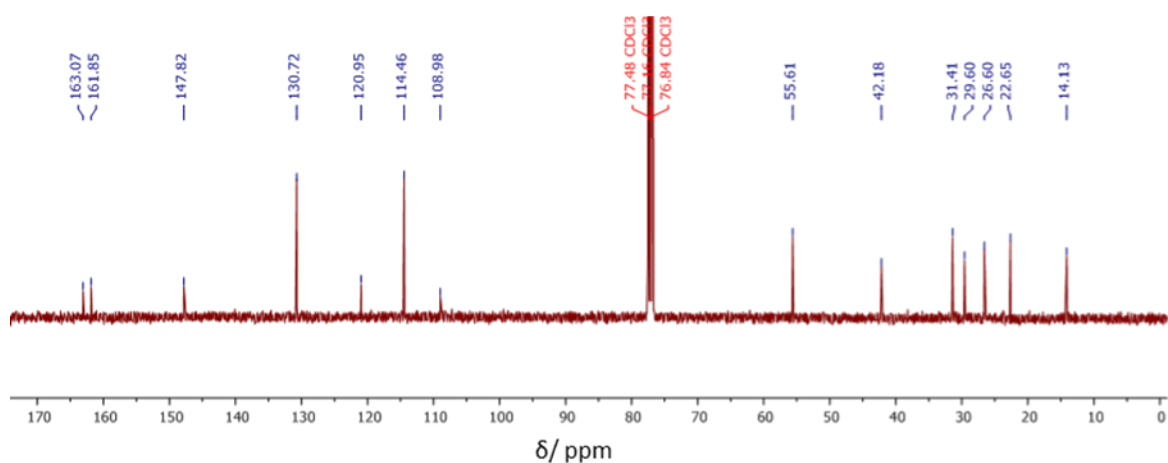

$^{13}\text{C}$  NMR spectrum of **PhOMeDPP N-Boc** in  $\text{CDCl}_3$

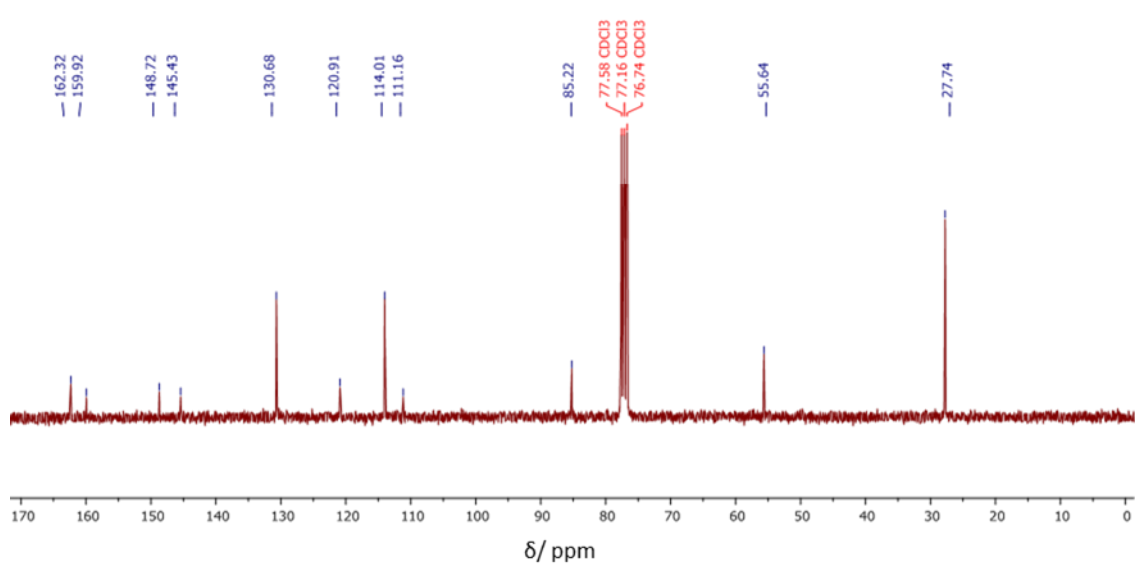

$^{13}\text{C}$  NMR spectrum of **PhOTHPDPP N-Hex** in  $\text{CDCl}_3$

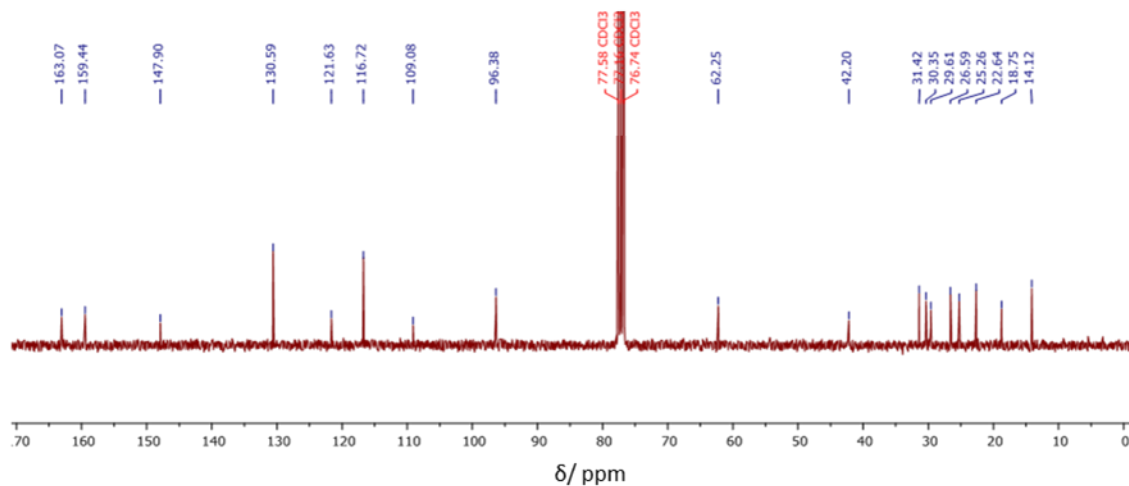

$^{13}\text{C}$  NMR spectrum of **PhOHDPP N-Hex** in  $\text{D}_6\text{-DMSO}$

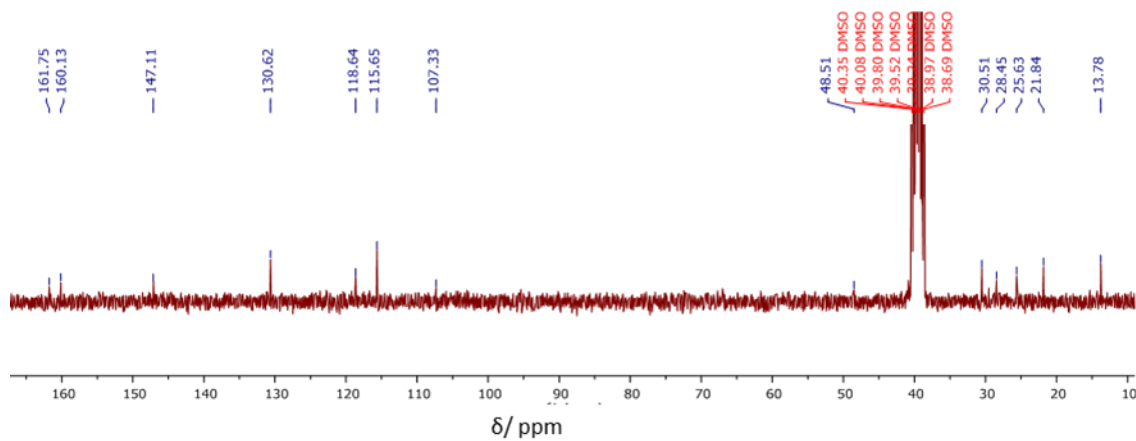

$^{13}\text{C}$  NMR spectrum of **PhOHDPP N-2MB** in  $\text{D}_6\text{-DMSO}$

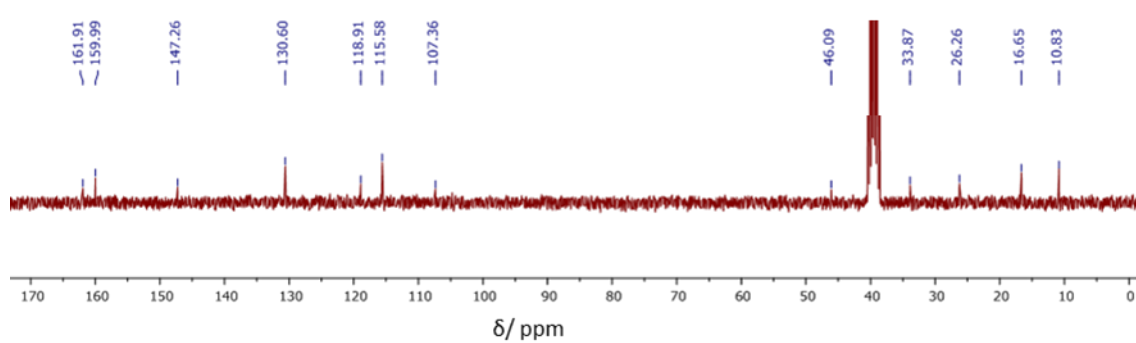

$^{13}\text{C}$  NMR spectrum of **PhOHDP** *N*-H in  $\text{D}_6$ -DMSO

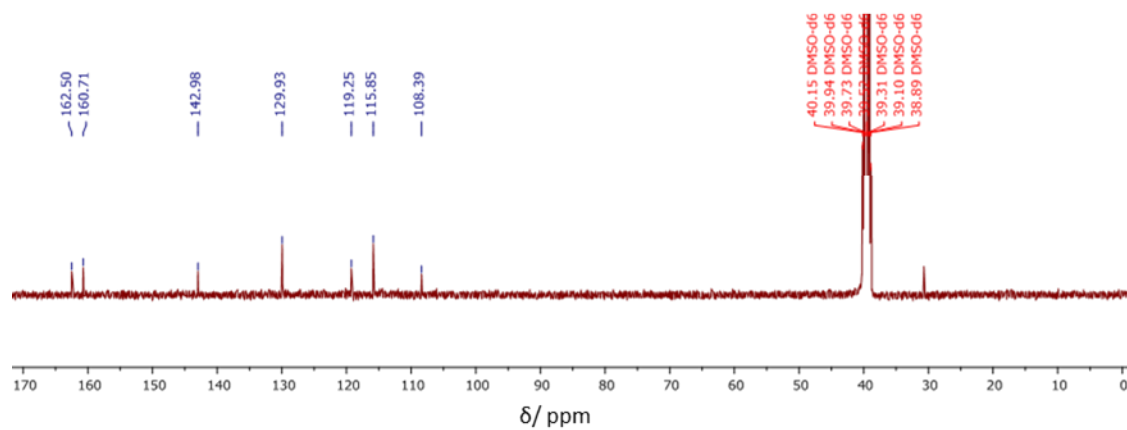

$^{13}\text{C}$  NMR spectrum of **PhOBocDP** *N*-Boc in  $\text{CDCl}_3$

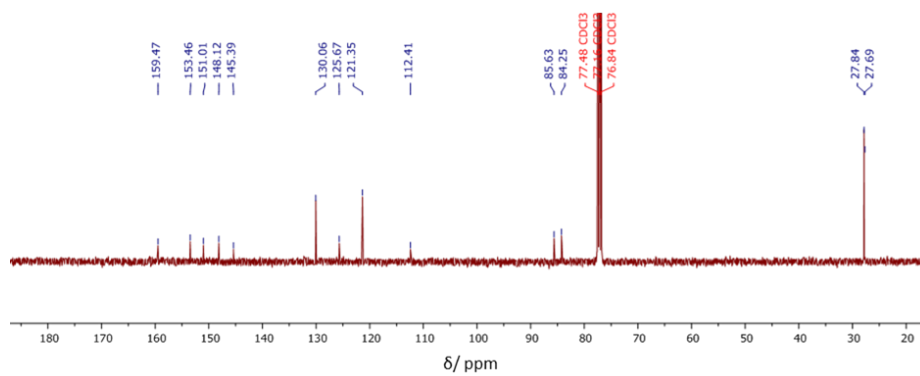

### 3. IR Spectra

FT-IR spectrum of PhOMeDPP *N*-H

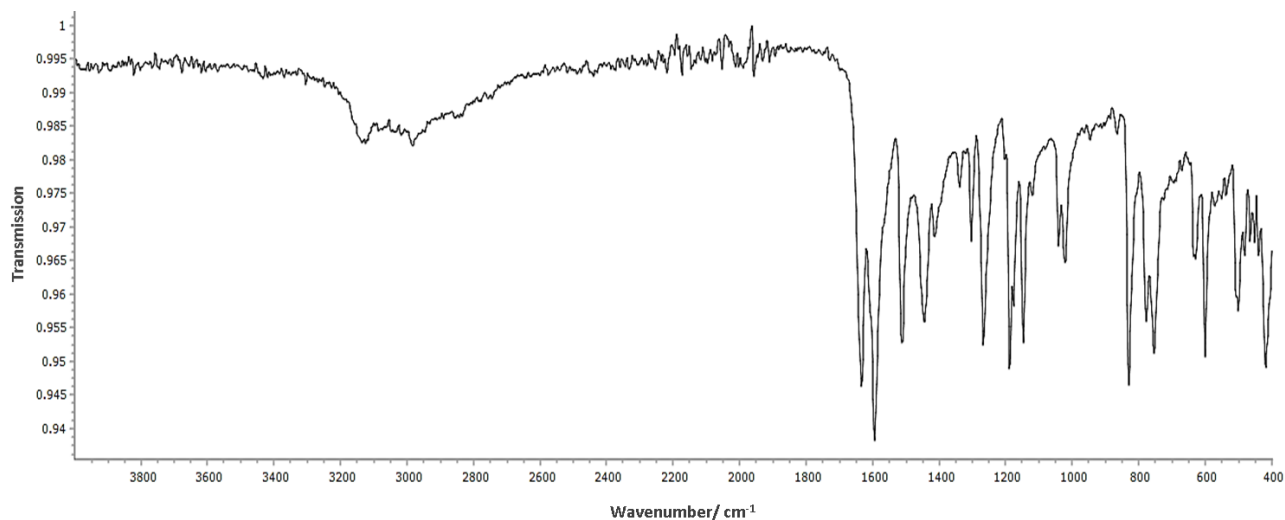

FT-IR spectrum of PhOMeDPP *N*-2MB

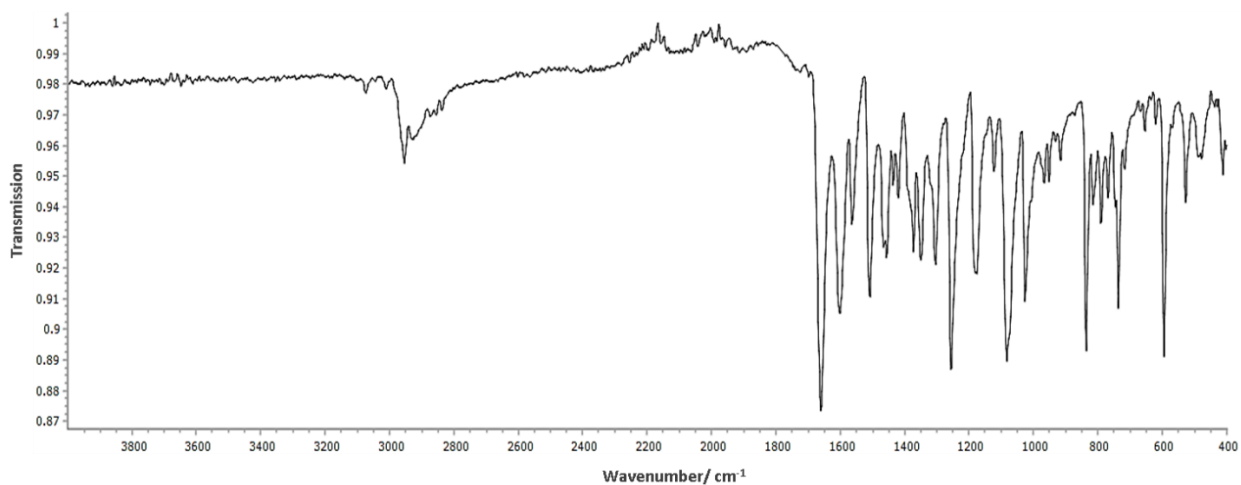

FT-IR spectrum of PhOMeDPP *N*-Hex

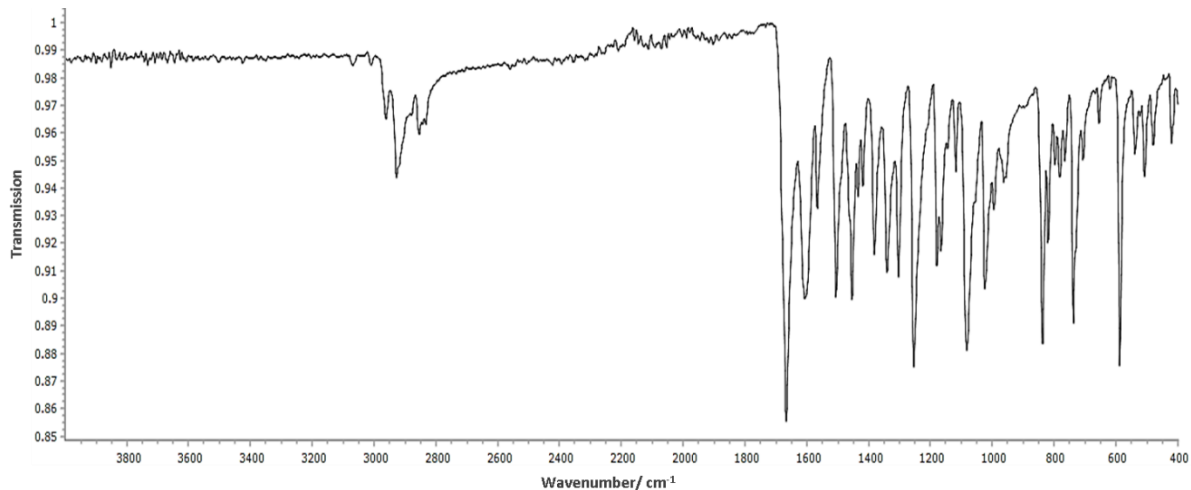

FT-IR spectrum of PhOMeDPP *N*-Boc

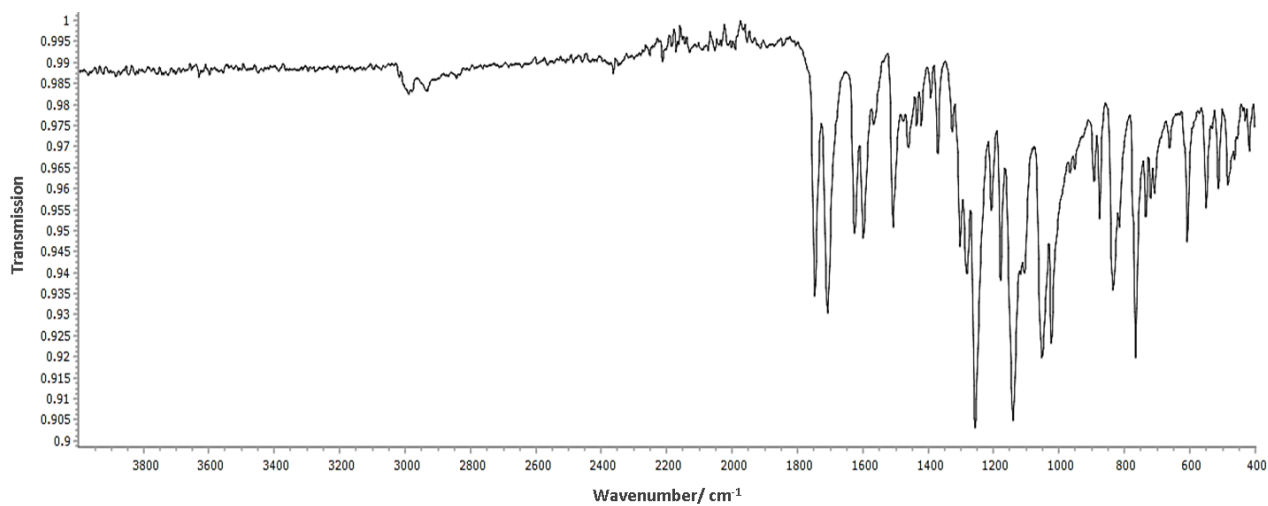

FT-IR spectrum of PhOTHPDPP *N*-Hex

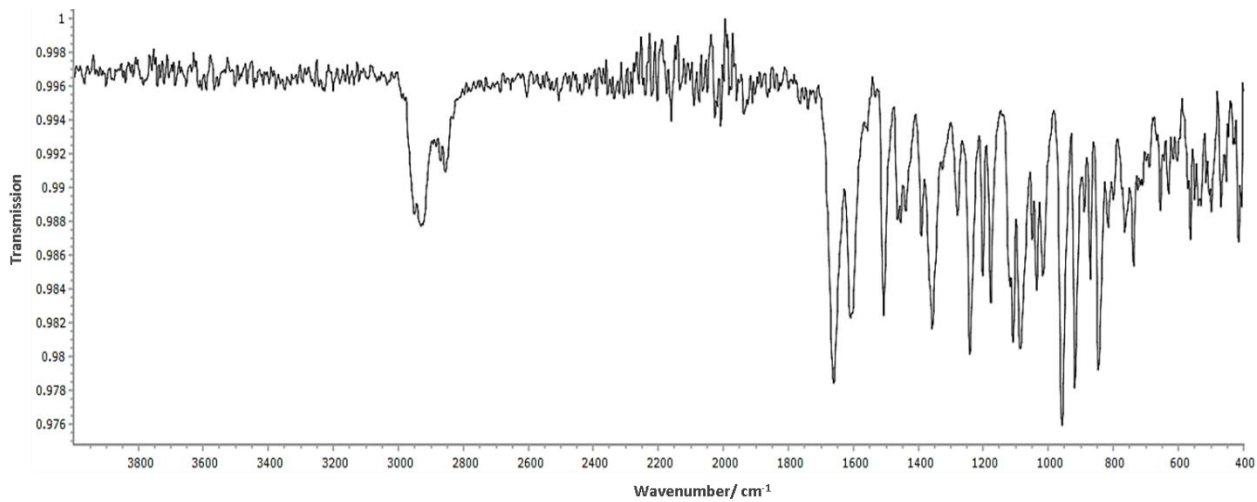

FT-IR spectrum of PhOHDPP *N*-Hex

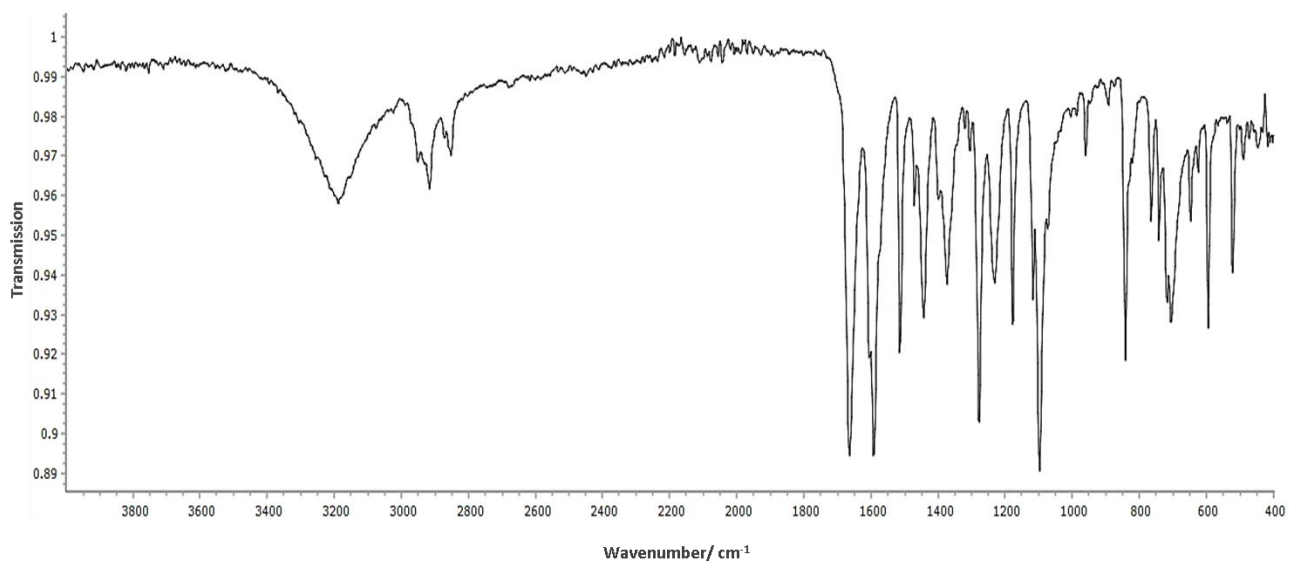

FT-IR spectrum of PhOHDPPE *N*-2MB

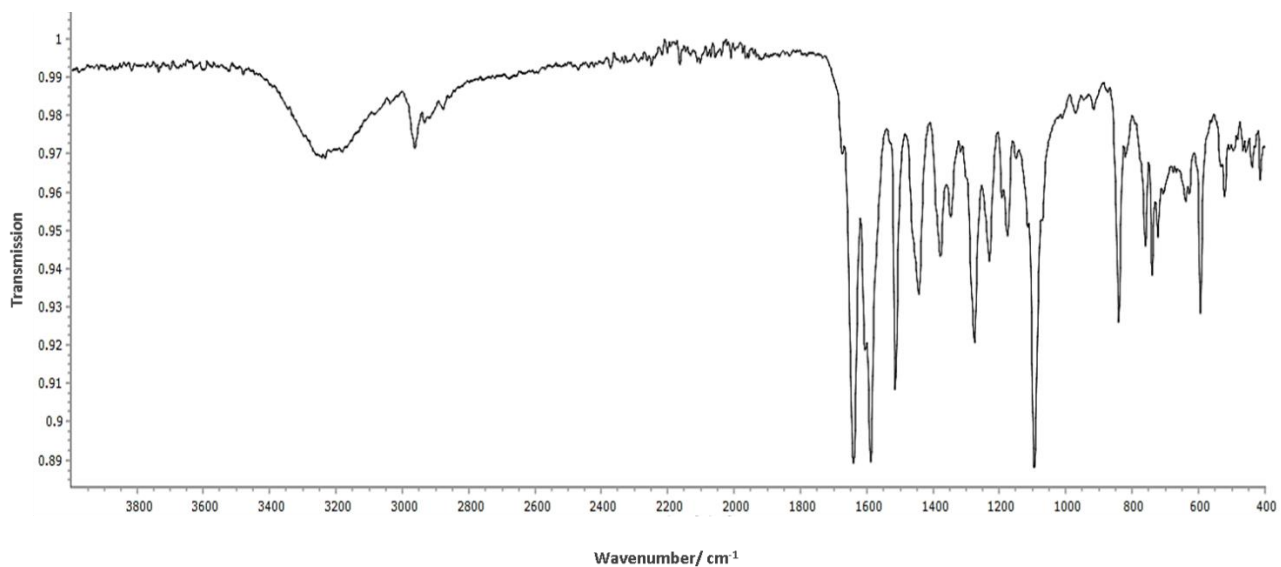

FT-IR spectrum of PhOHDPPE *N*-H

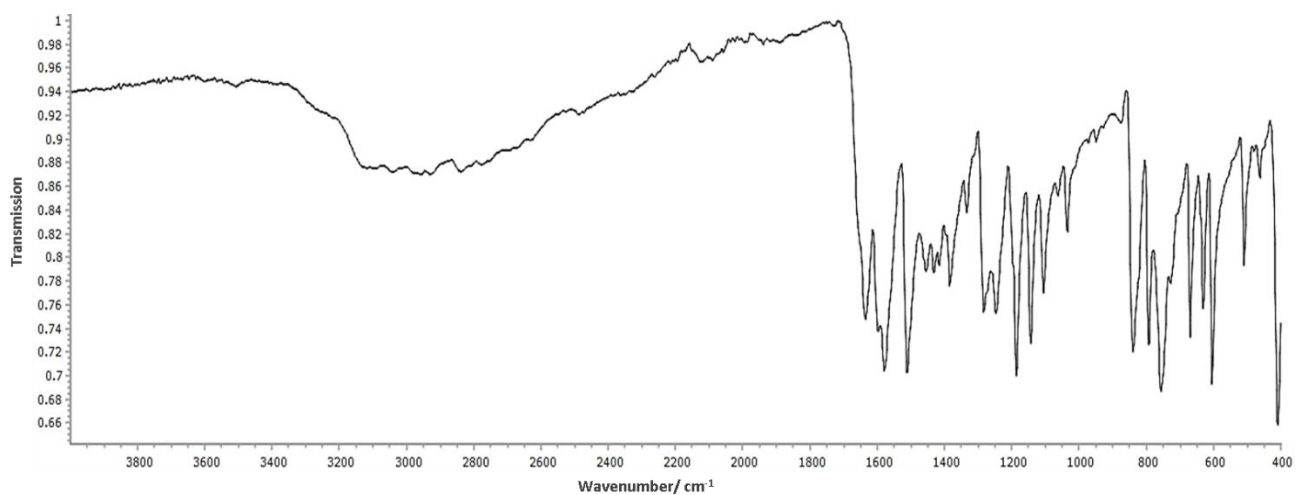

FT-IR spectrum of PhOBocDPPE *N*-Boc

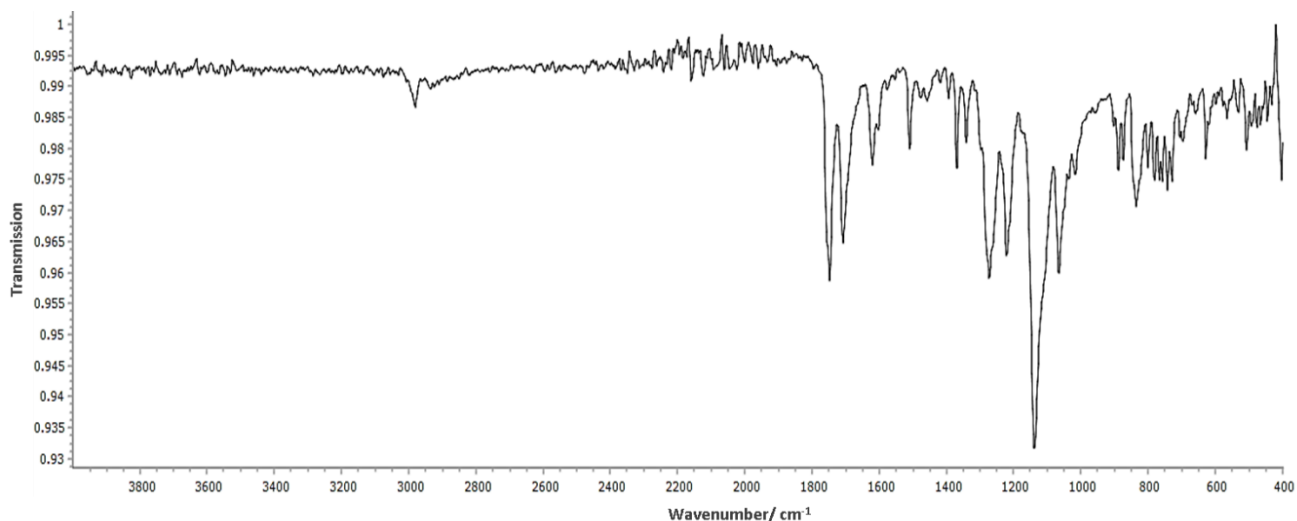

## 4. Mass Spectra

ESI-MS of PhOMeDPP N-2MB

Ionisation Mode ESI Positive Instrument Bruker MicroTOF

+MS, 1.0-1.2min #(74-88)

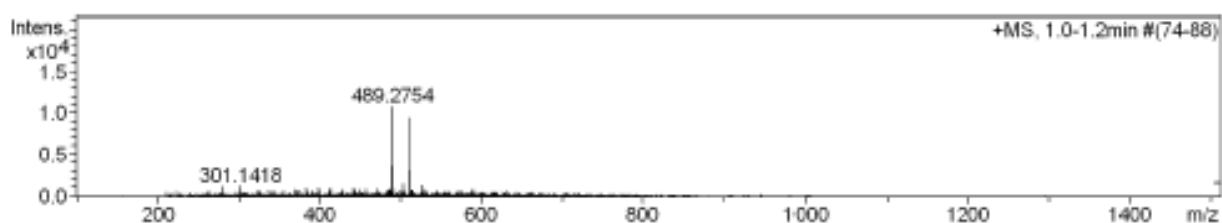

| #  | m/z      | I %   |
|----|----------|-------|
| 1  | 279.0966 | 10.0  |
| 2  | 301.1418 | 10.6  |
| 3  | 383.3039 | 8.8   |
| 4  | 398.1944 | 8.5   |
| 5  | 411.0953 | 7.1   |
| 6  | 413.2966 | 7.6   |
| 7  | 427.3401 | 7.1   |
| 8  | 441.3506 | 8.0   |
| 9  | 443.3366 | 7.1   |
| 10 | 457.3457 | 7.1   |
| 11 | 471.3612 | 7.5   |
| 12 | 485.3784 | 7.7   |
| 13 | 489.2754 | 100.0 |
| 14 | 490.2786 | 33.6  |
| 15 | 491.2834 | 7.2   |
| 16 | 503.2936 | 13.7  |
| 17 | 511.2574 | 87.9  |
| 18 | 512.2611 | 29.4  |
| 19 | 525.2745 | 11.3  |
| 20 | 589.4077 | 7.7   |

Generate Molecular Formula Parameters

No of Most Intense MS Peaks Analysed 5

Charge Tolerance sigma limit Calibration  
+1 6 ppm 0.08 TRUE

Formula Min C 25 H 28 N 2 O 4 Formula Max C 30 H 36 N 2 O 4 H Na

| # | meas. m/z | theo. m/z | Err [ppm] | Sigma  | Formula                |
|---|-----------|-----------|-----------|--------|------------------------|
| 1 | 489.2754  | 489.2748  | 1.30      | 0.0055 | C 30 H 37 N 2 O 4      |
| 2 | 511.2574  | 511.2567  | 1.30      | 0.0021 | C 30 H 36 N 2 Na 1 O 4 |

Note: Sigma fits < 0.05 indicates high probability of correct MF

ESI-MS of PhOMeDPP N-Hex

Ionisation Mode ESI Positive Instrument Bruker MicroTOF

+MS, 1.0-1.2min #(74-88)

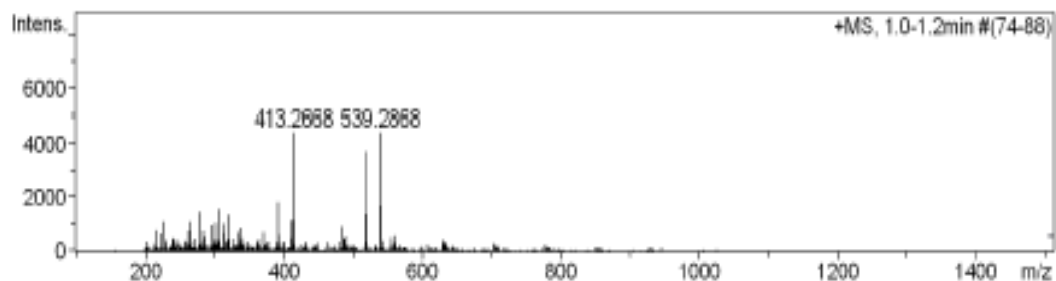

| #  | m/z      | I %   |
|----|----------|-------|
| 1  | 217.1042 | 17.0  |
| 2  | 226.9514 | 24.3  |
| 3  | 263.0586 | 16.8  |
| 4  | 265.1584 | 24.0  |
| 5  | 279.0994 | 32.3  |
| 6  | 297.1864 | 21.2  |
| 7  | 301.1332 | 23.2  |
| 8  | 305.1503 | 34.7  |
| 9  | 314.2081 | 22.7  |
| 10 | 319.1665 | 29.9  |
| 11 | 337.0765 | 19.0  |
| 12 | 391.2843 | 41.1  |
| 13 | 411.0943 | 25.1  |
| 14 | 413.2668 | 100.0 |
| 15 | 414.2692 | 25.1  |
| 16 | 485.1137 | 19.9  |
| 17 | 517.3072 | 84.2  |
| 18 | 518.3096 | 30.6  |
| 19 | 539.2868 | 100.0 |
| 20 | 540.2912 | 37.2  |

Generate Molecular Formula Parameters

| Charge | Tolerance | sigma limit | H/C Ratio | Electron Conf. | Nitrogen Rule | Chrom.BackGround | Calibration |
|--------|-----------|-------------|-----------|----------------|---------------|------------------|-------------|
| +1     | 6 ppm     | 0.08        | 3 - 0     | both           | false         | false            | TRUE        |

Expected Formula C32 H40 N2 O4 Adduct(s): H, Na, NH4, radical

| # | meas. m/z | theo. m/z | [Err][ppm] | Sigma  | Formula      | Adduct | Adduct Mass |
|---|-----------|-----------|------------|--------|--------------|--------|-------------|
| 1 | 517.3072  | 517.3061  | 2.10       | 0.0084 | C32H41N2O4   | M+H    | 1.0078      |
| 1 | 539.2868  | 539.2880  | 2.20       | 0.0072 | C32H40N2NaO4 | M+Na   | 22.9898     |

Note: Sigma fits < 0.05 indicates high probability of correct MF



ESI-MS of PhOMeDPP N-Boc

Ionisation Mode ESI<sup>+</sup> Positive

Instrument

Bruker MicroTOF

+MS, 1.0-1.2min #(74-88)

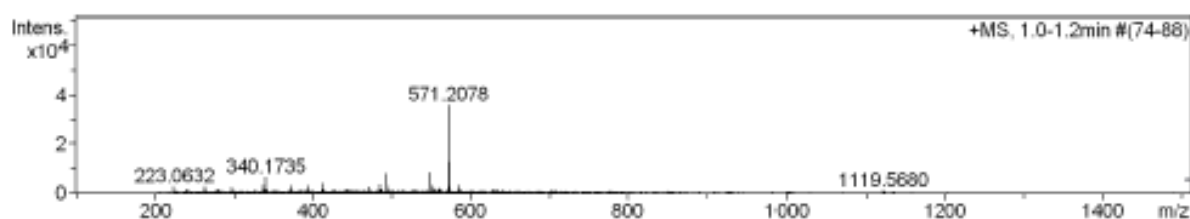

| #  | m/z      | I %   |
|----|----------|-------|
| 1  | 223.0632 | 7.0   |
| 2  | 263.0563 | 6.7   |
| 3  | 297.0819 | 5.3   |
| 4  | 337.0744 | 8.4   |
| 5  | 340.1735 | 17.3  |
| 6  | 371.1001 | 7.7   |
| 7  | 393.1077 | 7.8   |
| 8  | 411.0933 | 10.0  |
| 9  | 411.1871 | 4.7   |
| 10 | 471.1523 | 5.9   |
| 11 | 485.1140 | 8.5   |
| 12 | 493.1599 | 21.6  |
| 13 | 494.1652 | 7.6   |
| 14 | 549.2247 | 22.8  |
| 15 | 550.2268 | 7.6   |
| 16 | 559.1331 | 4.9   |
| 17 | 571.2078 | 100.0 |
| 18 | 572.2116 | 35.2  |
| 19 | 573.2093 | 7.7   |
| 20 | 585.2243 | 7.9   |

Generate Molecular Formula Parameters

No of Most Intense MS Peaks Analysed 5

Charge Tolerance sigma\_limit Calibration  
 +1 6 ppm 0.08 TRUE

Formula Min C 1 H 0 N 0 O 0 Formula Max C50 H100 N10 O10 H Na

| # | meas. m/z | theo. m/z | [Err](ppm) | Sigma  | Formula                 |
|---|-----------|-----------|------------|--------|-------------------------|
| 1 | 571.2078  | 571.2075  | 0.60       | 0.0029 | C 32 H 31 N 2 O 8       |
|   |           | 571.2064  | 2.50       | 0.0050 | C 31 H 28 N 6 Na 1 O 4  |
|   |           | 571.2061  | 2.90       | 0.0054 | C 30 H 29 N 5 O 7       |
|   |           | 571.2051  | 4.80       | 0.0074 | C 29 H 26 N 9 Na 1 O 3  |
|   |           | 571.2078  | 0.10       | 0.0083 | C 33 H 30 N 3 Na 1 O 5  |
| 2 | 572.2116  | 572.2086  | 5.20       | 0.0347 | C 23 H 28 N 10 O 8      |
|   |           | 572.2089  | 4.70       | 0.0390 | C 25 H 33 N 4 Na 1 O 10 |
|   |           | 572.2100  | 2.80       | 0.0405 | C 25 H 30 N 7 O 9       |
|   |           | 572.2113  | 0.50       | 0.0504 | C 27 H 32 N 4 O 10      |
|   |           | 572.2102  | 2.40       | 0.0545 | C 26 H 29 N 8 Na 1 O 6  |
| 3 | 549.2247  | 549.2231  | 2.90       | 0.0069 | C 30 H 33 N 2 O 8       |
|   |           | 549.2218  | 5.30       | 0.0094 | C 28 H 31 N 5 O 7       |

# ESI-MS of PhOTHPDPP *N*-Hex

Ionisation Mode      ESI      Positive      Instrument      Bruker MicroTOF

+MS, 0.7-0.9min #59-75

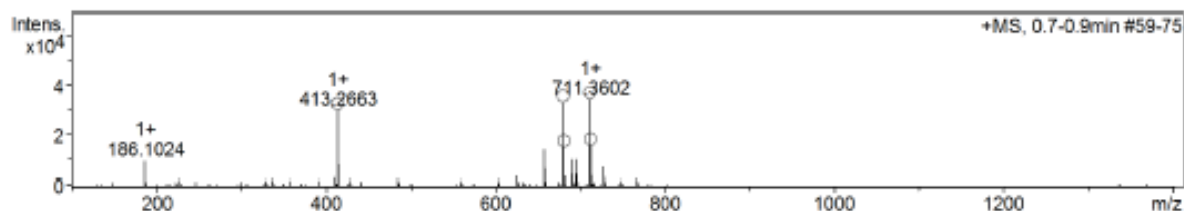

| #  | m/z      | I %   |
|----|----------|-------|
| 1  | 186.1024 | 28.7  |
| 2  | 411.0950 | 9.2   |
| 3  | 413.2663 | 87.0  |
| 4  | 414.2695 | 23.9  |
| 5  | 485.1131 | 8.1   |
| 6  | 625.3252 | 11.1  |
| 7  | 657.3905 | 41.8  |
| 8  | 658.3936 | 19.6  |
| 9  | 679.3715 | 96.5  |
| 10 | 680.3749 | 43.9  |
| 11 | 681.3775 | 11.1  |
| 12 | 689.3790 | 30.8  |
| 13 | 690.3824 | 13.3  |
| 14 | 695.3549 | 30.0  |
| 15 | 696.3576 | 13.6  |
| 16 | 711.3602 | 100.0 |
| 17 | 712.3641 | 45.5  |
| 18 | 713.3655 | 12.0  |
| 19 | 727.3354 | 21.7  |
| 20 | 728.3391 | 10.2  |

## Generate Molecular Formula Parameters

No of Most Intense MS Peaks Analysed 5

Charge Tolerance sigma\_limit Calibration  
+1 6 ppm 0.08 TRUE

Formula Min C 1 H 0 N 0 O 0      Formula Max C50 H100 N10 O10 H Na

| # | meas. m/z | theo. m/z | [Err][ppm] | Sigma  | Formula                |
|---|-----------|-----------|------------|--------|------------------------|
| 1 | 711.3602  | 711.3627  | 3.50       | 0.0032 | C 40 H 49 N 5 O 7      |
|   |           | 711.3616  | 2.00       | 0.0045 | C 40 H 52 N 2 Na 1 O 8 |
|   |           | 711.3613  | 1.60       | 0.0068 | C 38 H 47 N 8 O 6      |
|   |           | 711.3616  | 2.00       | 0.0070 | C 39 H 46 N 9 Na 1 O 3 |
|   |           | 711.3640  | 5.40       | 0.0081 | C 42 H 51 N 2 O 8      |
| 2 | 679.3715  | 679.3728  | 1.90       | 0.0023 | C 40 H 49 N 5 O 5      |
|   |           | 679.3718  | 0.40       | 0.0041 | C 40 H 52 N 2 Na 1 O 6 |

ESI-MS of PhOHDP *N*-Hex

Ionisation Mode ESI Negative Instrument Bruker MicroTOF

-MS, 1.0-1.2min #(74-88)

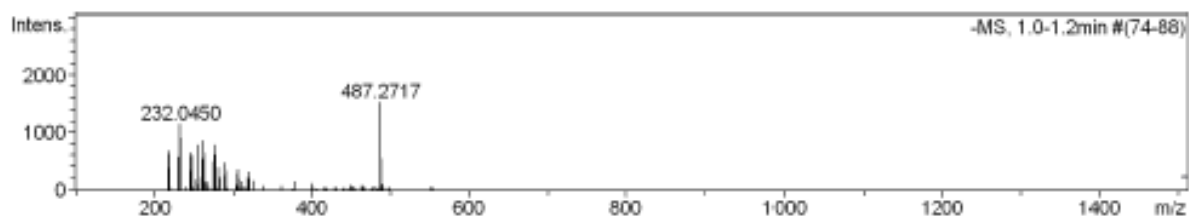

| #  | m/z      | I %   |
|----|----------|-------|
| 1  | 217.0327 | 24.8  |
| 2  | 218.0292 | 44.4  |
| 3  | 219.0260 | 40.2  |
| 4  | 231.0479 | 37.5  |
| 5  | 232.0450 | 74.7  |
| 6  | 233.0415 | 59.1  |
| 7  | 246.0607 | 41.7  |
| 8  | 247.0565 | 38.6  |
| 9  | 255.2316 | 51.1  |
| 10 | 261.0457 | 35.3  |
| 11 | 262.0383 | 56.2  |
| 12 | 263.0344 | 41.0  |
| 13 | 275.0575 | 31.4  |
| 14 | 276.0537 | 51.7  |
| 15 | 277.0497 | 39.7  |
| 16 | 281.2478 | 25.3  |
| 17 | 290.0685 | 30.4  |
| 18 | 306.0456 | 22.9  |
| 19 | 487.2717 | 100.0 |
| 20 | 488.2753 | 35.5  |

Generate Molecular Formula Parameters

No of Most Intense MS Peaks Analysed 5

Charge Tolerance sigma limit Calibration  
-1 6 ppm 0.08 TRUE

Formula Min C 1 H 0 N 0 O 0 Formula Max C50 H100 N10 O10 H Na

| # | meas. m/z | theo. m/z | [Err][ppm] | Sigma  | Formula                |
|---|-----------|-----------|------------|--------|------------------------|
| 1 | 487.2717  | 487.2731  | 2.80       | 0.0038 | C 32 H 36 N 2 Na 1 O 1 |
|   |           | 487.2717  | 0.00       | 0.0056 | C 30 H 34 N 5 Na 1     |
|   |           | 487.2728  | 2.20       | 0.0075 | C 31 H 37 N 1 O 4      |
|   |           | 487.2741  | 4.90       | 0.0079 | C 32 H 33 N 5          |
|   |           | 487.2715  | 0.60       | 0.0120 | C 29 H 35 N 4 O 3      |

ESI-MS of PhOHDP N-2MB

Ionisation Mode ESI Positive Instrument Bruker MicroTOF

+MS, 1.0-1.2min #(74-88)

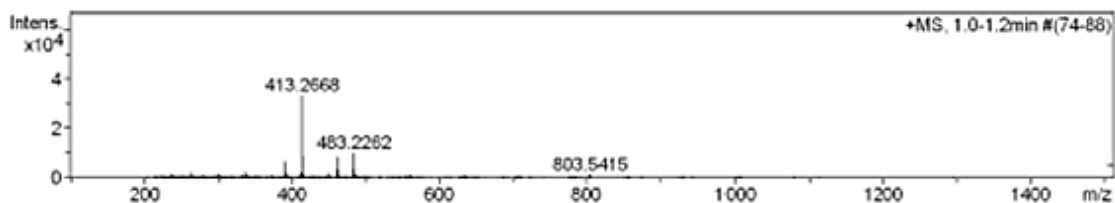

| #  | m/z      | I %   |
|----|----------|-------|
| 1  | 236.0718 | 3.8   |
| 2  | 263.0566 | 5.9   |
| 3  | 301.1374 | 4.0   |
| 4  | 332.1098 | 2.8   |
| 5  | 337.0745 | 6.4   |
| 6  | 391.2842 | 19.2  |
| 7  | 392.2879 | 5.5   |
| 8  | 411.0944 | 5.3   |
| 9  | 413.0954 | 3.0   |
| 10 | 413.2668 | 100.0 |
| 11 | 414.2703 | 25.4  |
| 12 | 415.2723 | 4.0   |
| 13 | 450.3594 | 4.9   |
| 14 | 461.2452 | 24.7  |
| 15 | 462.2484 | 8.0   |
| 16 | 483.2262 | 29.7  |
| 17 | 484.2291 | 9.5   |
| 18 | 485.1123 | 4.0   |
| 19 | 559.1349 | 3.0   |
| 20 | 803.5415 | 3.5   |

Generate Molecular Formula Parameters

No of Most Intense MS Peaks Analysed 5

Charge Tolerance sigma limit Calibration  
+1 6 ppm 0.08 TRUE

Formula Min C 1 H 0 N 0 O 0 Formula Max C 50 H 100 N 10 O 10 H Na

| # | meas. m/z | theo. m/z | Err [ppm] | Sigma  | Formula                |
|---|-----------|-----------|-----------|--------|------------------------|
| 1 | 413.2668  | 413.2649  | 4.60      | 0.0022 | C 22 H 36 N 3 Na 1 O 3 |
|   |           | 413.2662  | 1.40      | 0.0056 | C 24 H 38 Na 1 O 4     |
|   |           | 413.2660  | 2.10      | 0.0058 | C 22 H 33 N 6 O 2      |
|   |           | 413.2646  | 5.30      | 0.0059 | C 20 H 31 N 9 O 1      |
|   |           | 413.2646  | 5.30      | 0.0090 | C 21 H 37 N 2 O 6      |
| 2 | 483.2262  | 483.2265  | 0.70      | 0.0036 | C 28 H 29 N 5 O 3      |
|   |           | 483.2254  | 1.50      | 0.0048 | C 28 H 32 N 2 Na 1 O 4 |
|   |           | 483.2251  | 2.10      | 0.0057 | C 26 H 27 N 8 O 2      |
|   |           | 483.2268  | 1.30      | 0.0084 | C 29 H 28 N 6 Na 1     |
|   |           | 483.2278  | 3.50      | 0.0098 | C 30 H 31 N 2 O 4      |
| 3 | 414.2703  | 414.2684  | 4.40      | 0.0204 | C 16 H 38 N 4 O 8      |
|   |           | 414.2698  | 1.20      | 0.0236 | C 18 H 40 N 1 O 9      |
|   |           | 414.2687  | 3.80      | 0.0279 | C 17 H 37 N 5 Na 1 O 5 |
|   |           | 414.2698  | 1.20      | 0.0340 | C 17 H 34 N 8 O 4      |
|   |           | 414.2700  | 0.50      | 0.0345 | C 19 H 39 N 2 Na 1 O 6 |
| 4 | 461.2452  | 461.2435  | 3.70      | 0.0081 | C 28 H 33 N 2 O 4      |
|   |           | 461.2438  | 3.10      | 0.0082 | C 29 H 32 N 3 Na 1 O 1 |
|   |           | 461.2451  | 0.10      | 0.0086 | C 31 H 34 Na 1 O 2     |
|   |           | 461.2448  | 0.80      | 0.0089 | C 29 H 29 N 6          |
|   |           | 461.2424  | 6.00      | 0.0114 | C 27 H 30 N 6 Na 1     |

# MALDI of PhHDPP N-H

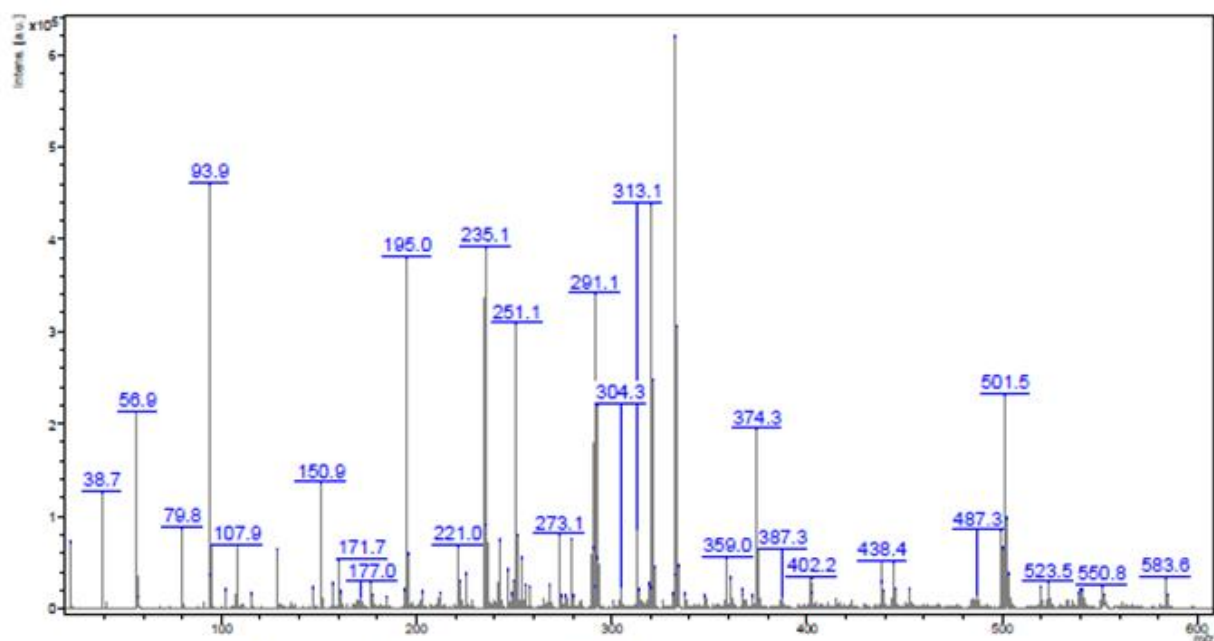

| m/z     | Rel. Intens. | Intens.   | m/z     | Rel. Intens. | Intens.   |
|---------|--------------|-----------|---------|--------------|-----------|
| 752.827 | 4            | 22939.00  | 367.247 | 3            | 19039.50  |
| 751.826 | 7            | 42171.00  | 367.080 | 2            | 13672.50  |
| 584.583 | 2            | 12992.00  | 361.039 | 5            | 31921.50  |
| 583.578 | 5            | 31475.00  | 359.040 | 9            | 53462.00  |
| 551.857 | 2            | 12913.50  | 348.152 | 2            | 12673.50  |
| 550.845 | 4            | 22963.50  | 337.934 | 2            | 14151.50  |
| 541.478 | 3            | 18373.50  | 334.227 | 7            | 44803.50  |
| 540.454 | 3            | 18715.50  | 333.234 | 49           | 304251.50 |
| 539.449 | 2            | 15378.50  | 332.698 | 6            | 34629.50  |
| 523.498 | 4            | 26602.00  | 332.237 | 100          | 617231.50 |
| 519.501 | 4            | 21626.00  | 331.214 | 2            | 14448.50  |
| 503.498 | 6            | 35600.00  | 322.101 | 7            | 43281.50  |
| 502.495 | 16           | 96606.00  | 321.095 | 40           | 245424.50 |
| 501.489 | 37           | 229253.00 | 320.553 | 3            | 20353.50  |
| 500.488 | 10           | 64081.00  | 320.091 | 71           | 437037.50 |
| 499.476 | 13           | 81896.00  | 319.080 | 4            | 25506.50  |
| 487.284 | 2            | 13120.00  | 314.131 | 3            | 18347.50  |
| 452.988 | 3            | 19251.50  | 313.124 | 14           | 85537.50  |
| 445.413 | 3            | 19905.50  | 304.301 | 4            | 21694.00  |
| 444.419 | 8            | 48632.50  | 293.115 | 9            | 52849.00  |
| 439.362 | 3            | 17508.50  | 292.093 | 35           | 218990.00 |
| 438.622 | 4            | 27199.50  | 291.533 | 4            | 21969.00  |
| 438.351 | 8            | 49517.50  | 291.074 | 55           | 339120.00 |
| 403.156 | 3            | 15671.50  | 290.095 | 10           | 64435.00  |
| 402.166 | 5            | 31870.50  | 280.080 | 2            | 12763.00  |
| 387.346 | 2            | 12668.50  | 279.074 | 12           | 73324.00  |
| 387.042 | 2            | 12990.50  | 276.244 | 2            | 12308.00  |
| 375.291 | 10           | 62276.50  | 274.130 | 2            | 12026.00  |
| 374.282 | 31           | 192009.50 | 273.126 | 13           | 77865.00  |
| 372.296 | 2            | 12825.50  | 268.160 | 4            | 23988.00  |

# ESI-MS of PhOBocDPP N-Boc

Ionisation Mode ESI Positive Instrument Bruker MicroTOF

+MS, 0.6-0.7min #51-62

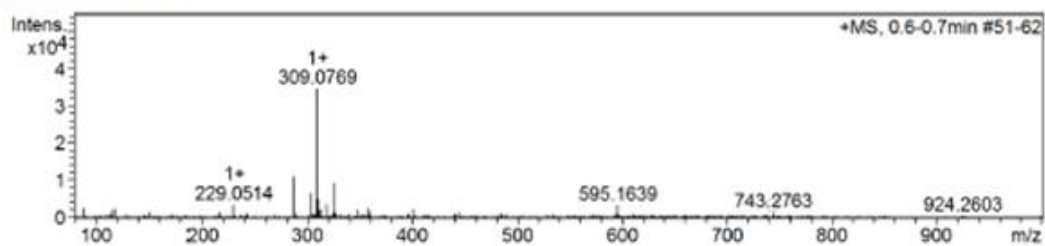

| #  | m/z      | I %   |
|----|----------|-------|
| 1  | 88.0754  | 7.8   |
| 2  | 116.0713 | 6.5   |
| 3  | 118.0863 | 7.2   |
| 4  | 215.1228 | 5.1   |
| 5  | 229.0514 | 10.4  |
| 6  | 287.0936 | 32.1  |
| 7  | 288.0990 | 4.9   |
| 8  | 304.1202 | 19.6  |
| 9  | 309.0769 | 100.0 |
| 10 | 310.0782 | 14.9  |
| 11 | 311.0761 | 6.2   |
| 12 | 313.2336 | 6.6   |
| 13 | 318.1353 | 10.9  |
| 14 | 325.0489 | 27.1  |
| 15 | 348.1478 | 6.6   |
| 16 | 357.2541 | 7.7   |
| 17 | 360.1488 | 5.3   |
| 18 | 401.2857 | 6.8   |
| 19 | 445.3109 | 4.5   |
| 20 | 595.1639 | 9.9   |

### Generate Molecular Formula Parameters

| Charge                  | Tolerance | sigma limit    | H/C Ratio | Electron Conf. | Nitrogen Rule     | Chrom.BackGround | Calibration                 |
|-------------------------|-----------|----------------|-----------|----------------|-------------------|------------------|-----------------------------|
| +1                      | 6 ppm     | 0.08           | 3 - 0     | both           | false             | false            | TRUE                        |
| <b>Expected Formula</b> |           | C38 H44 N2 O12 |           |                | <b>Adduct(s):</b> |                  | H, Na, NH4, C3H5N2, radical |
| #                       | meas. m/z | theo. m/z      | Err [ppm] | Sigma          | Formula           | Adduct           | Adduct Mass                 |
| 1                       | 743.2763  | 743.2786       | 3.20      | 0.0698         | C38H44N2NaO12     | M+Na             | 22.9898                     |

Note: Sigma fits < 0.05 indicates high probability of correct MF

## 5. Electrochemistry

Cyclic voltammogram of **PhOMeDPP N-2MB** in acetonitrile at 100 mV/s scan rate

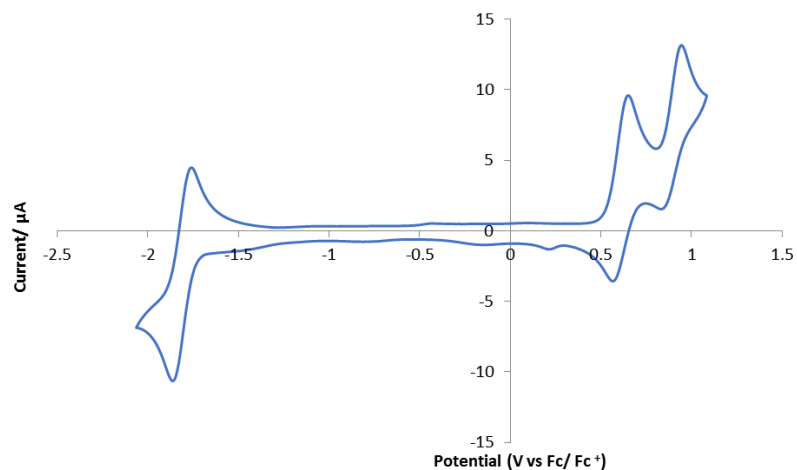

Cyclic voltammogram of **PhOMeDPP N-Hex** in acetonitrile at 100 mV/s scan rate

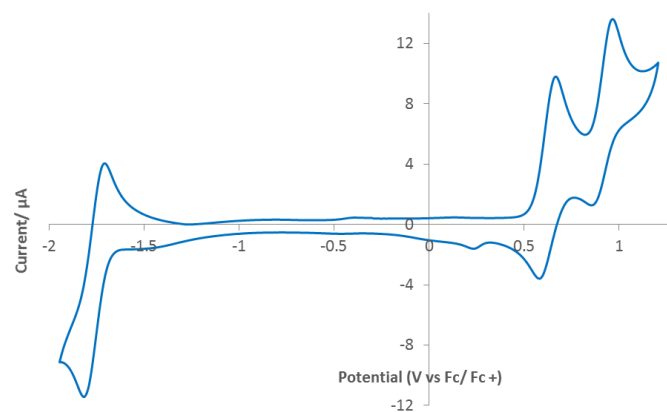

Cyclic voltammogram of **PhOMeDPP N-Boc** in dichloromethane at 100 mV/s scan rate

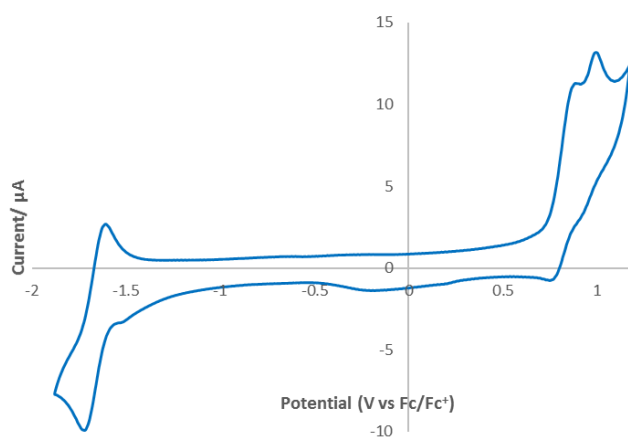

Cyclic voltammogram of **PhOHDPP N-Hex** in dimethylformamide at 100 mV/s scan rate

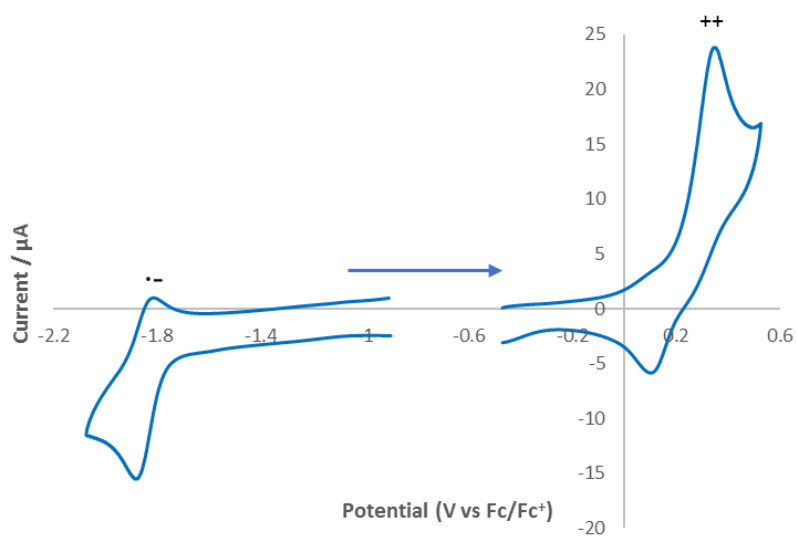

Cyclic voltammogram of **PhOHDPP N-2MB** in dimethylformamide at 100 mV/s scan rate

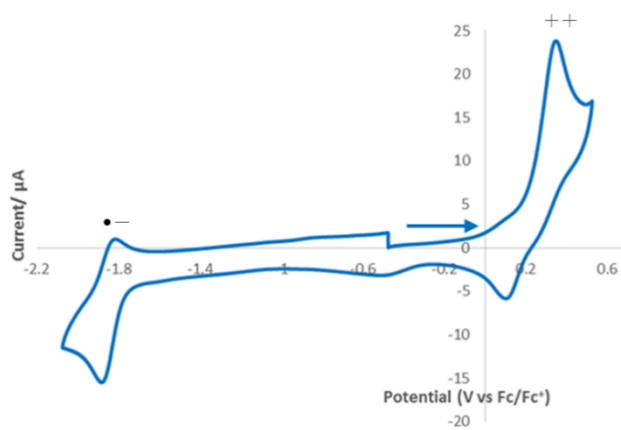

### **PhOTHPDPP N-Hex**

Cyclic voltammogram of **PhOTHPDPP N-Hex** in acetonitrile at 100 mV/s scan rate

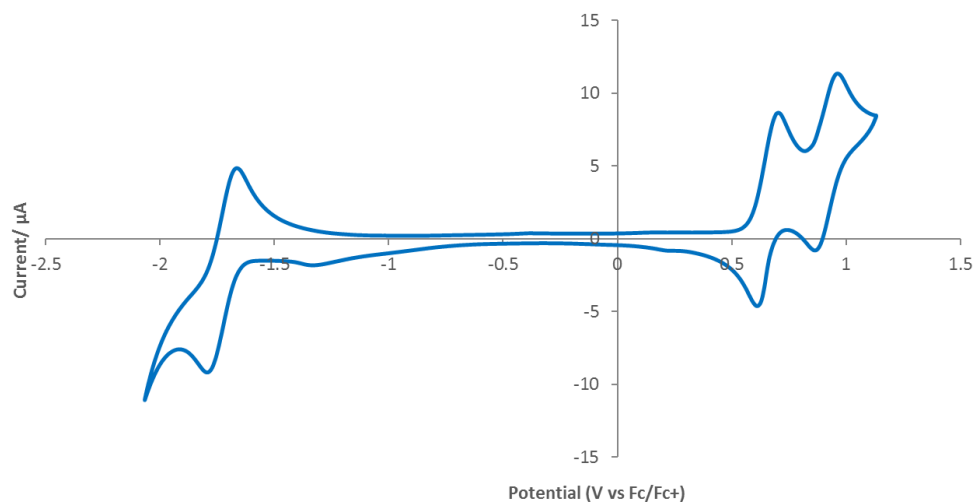



Cyclic voltammogram of **PhOBocDPP N-Boc** in dichloromethane at 100 mV/s scan rate

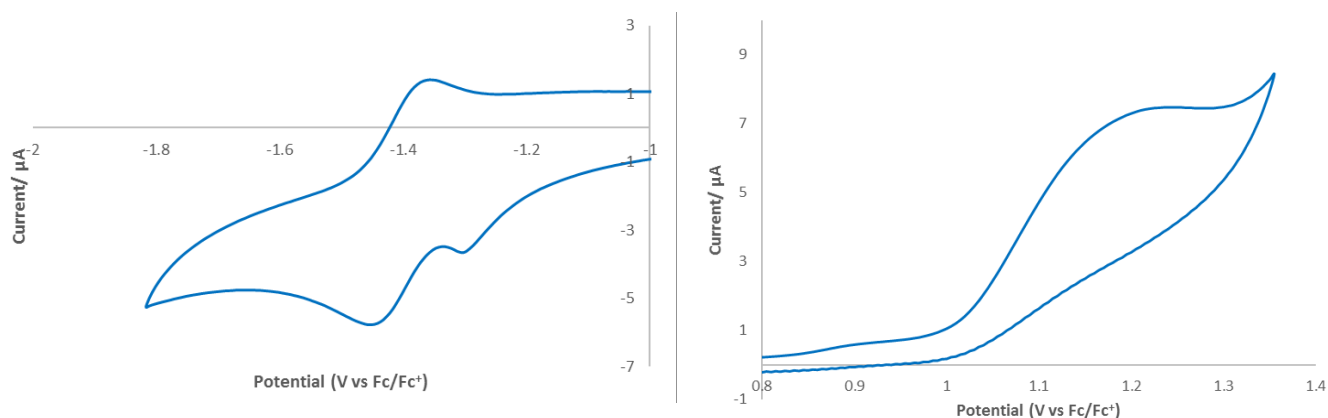

Table of potentials for oxidation and reduction processes for **PhOMeDPP N-2MB**, **PhOMeDPP N-Hex**, **PhOMeDPP N-Boc**, **PhOHDPP N-2MB**, **PhOHDPP N-Hex**, **PhOBocDPP N-Boc** and **PhOHPDPP N-Hex** at 100 mV/s scan rate. Potentials in V versus  $Fc^+ / Fc$ . Values in brackets are  $E_{pa} - E_{pc}$  for couples.

| Compound               | $E_{pc}$ (1st ox) / V | $E_{pa}$ (1st ox) / V | $E_{1/2}$ (1st ox) / V | $E_{pa}$ (2nd ox) / V | $E_{pc}$ (red) / V | $E_{pa}$ (red) / V | $E_{1/2}$ (red) / V |
|------------------------|-----------------------|-----------------------|------------------------|-----------------------|--------------------|--------------------|---------------------|
| <b>PhOMeDPP N-2MB</b>  | + 0.50                | + 0.59                | + 0.54<br>(0.09)       | + 0.84                | - 1.83             | - 1.73             | - 1.78<br>(0.10)    |
| <b>PhOMeDPP N-Hex</b>  | + 0.48                | + 0.56                | + 0.52<br>(0.08)       | + 0.81                | - 1.84             | - 1.70             | - 1.77<br>(0.13)    |
| <b>PhOMeDPP N-Boc</b>  | + 0.89                | -                     | -                      | + 0.98                | - 1.71             | - 1.62             | - 1.66<br>(0.09)    |
| <b>PhOHDPP N-2MB</b>   | + 0.10                | + 0.36                | + 0.23<br>(0.26)       | -                     | - 1.85             | - 1.82             | - 1.85<br>(0.06)    |
| <b>PhOHDPP N-Hex</b>   | + 0.12                | + 0.29                | + 0.21<br>(0.17)       | -                     | - 1.89             | - 1.81             | - 1.85<br>(0.08)    |
| <b>PhOBocDPP N-Boc</b> | + 1.24                | -                     | -                      | -                     | - 1.46             | - 1.36             | - 1.41<br>(0.10)    |
| <b>PhOHPDPP N-Hex</b>  | +0.62                 | +0.70                 | +0.66<br>(0.08)        | +0.96                 | -1.76              | -1.69              | -1.72<br>(0.07)     |

## 6. Crystallographic tables

| Identification code                                                           | PhOMeDPP <i>N</i> -2MB                                                       | PhOMeDPP <i>N</i> -Hex                                                       | PhOHDPP <i>N</i> -Hex                                                        | PhOHDPP <i>N</i> -2MB                                                        |
|-------------------------------------------------------------------------------|------------------------------------------------------------------------------|------------------------------------------------------------------------------|------------------------------------------------------------------------------|------------------------------------------------------------------------------|
| <b>Empirical formula</b>                                                      | C <sub>30</sub> H <sub>36</sub> N <sub>2</sub> O <sub>4</sub>                | C <sub>32</sub> H <sub>40</sub> N <sub>2</sub> O <sub>4</sub>                | C <sub>30</sub> H <sub>36</sub> N <sub>2</sub> O <sub>4</sub>                | C <sub>28</sub> H <sub>32</sub> N <sub>2</sub> O <sub>4</sub>                |
| <b>Formula weight</b>                                                         | 488.61                                                                       | 516.66                                                                       | 488.61                                                                       | 460.55                                                                       |
| <b>Temperature/K</b>                                                          | 120(2)                                                                       | 120.00(12)                                                                   | 120(2)                                                                       | 120(2)                                                                       |
| <b>Crystal system</b>                                                         | monoclinic                                                                   | monoclinic                                                                   | triclinic                                                                    | monoclinic                                                                   |
| <b>Space group</b>                                                            | <i>P</i> 2 <sub>1</sub>                                                      | <i>P</i> 2 <sub>1</sub> / <i>c</i>                                           | <i>P</i> -1                                                                  | <i>P</i> 2 <sub>1</sub>                                                      |
| <b><i>a</i>/Å</b>                                                             | 11.0360(8)                                                                   | 17.998(4)                                                                    | 5.2797(14)                                                                   | 11.3208(2)                                                                   |
| <b><i>b</i>/Å</b>                                                             | 11.6239(6)                                                                   | 10.8801(7)                                                                   | 7.831(2)                                                                     | 8.58917(16)                                                                  |
| <b><i>c</i>/Å</b>                                                             | 11.4808(10)                                                                  | 11.445(5)                                                                    | 16.028(3)                                                                    | 13.1920(3)                                                                   |
| <b><math>\alpha</math>/°</b>                                                  | 90                                                                           | 90                                                                           | 76.61(2)                                                                     | 90                                                                           |
| <b><math>\beta</math>/°</b>                                                   | 118.259(11)                                                                  | 141.57(5)                                                                    | 85.29(2)                                                                     | 108.388(2)                                                                   |
| <b><math>\gamma</math>/°</b>                                                  | 90                                                                           | 90                                                                           | 76.64(2)                                                                     | 90                                                                           |
| <b>Volume/Å<sup>3</sup></b>                                                   | 1297.3(2)                                                                    | 1393.0(12)                                                                   | 627.0(3)                                                                     | 1217.25(5)                                                                   |
| <b><i>Z</i> (<i>Z'</i>)</b>                                                   | 2 (1)                                                                        | 2 (0.5)                                                                      | 1 (0.5)                                                                      | 2 (1)                                                                        |
| <b><math>\rho_{\text{calc}}</math> g/cm<sup>3</sup></b>                       | 1.251                                                                        | 1.232                                                                        | 1.294                                                                        | 1.257                                                                        |
| <b><math>\mu</math>/mm<sup>-1</sup></b>                                       | 0.660                                                                        | 0.641                                                                        | 0.683                                                                        | 0.674                                                                        |
| <b><i>F</i>(000)</b>                                                          | 524.0                                                                        | 556.0                                                                        | 262.0                                                                        | 492.0                                                                        |
| <b>Crystal size/mm</b>                                                        | 0.34 × 0.2434 × 0.1397                                                       | 0.15 × 0.103 × 0.027                                                         | 0.141 × 0.048 × 0.036                                                        | 0.196 × 0.115 × 0.061                                                        |
| <b>Radiation type</b>                                                         | CuK $\alpha$                                                                 | CuK $\alpha$                                                                 | CuK $\alpha$                                                                 | CuK $\alpha$                                                                 |
| <b>2<math>\theta</math> range for data collection/°</b>                       | 8.744 to 148.84                                                              | 12.766 to 117.826                                                            | 11.354 to 147.158                                                            | 8.23 to 156.62                                                               |
| <b>Index ranges</b>                                                           | -13 ≤ <i>h</i> ≤ 13, -14 ≤ <i>k</i> ≤ 14, -12 ≤ <i>l</i> ≤ 14                | -19 ≤ <i>h</i> ≤ 15, -8 ≤ <i>k</i> ≤ 12, -9 ≤ <i>l</i> ≤ 12                  | -4 ≤ <i>h</i> ≤ 6, -9 ≤ <i>k</i> ≤ 9, -19 ≤ <i>l</i> ≤ 19                    | -14 ≤ <i>h</i> ≤ 14, -10 ≤ <i>k</i> ≤ 10, -16 ≤ <i>l</i> ≤ 16                |
| <b>Reflections collected</b>                                                  | 8266                                                                         | 2973                                                                         | 4095                                                                         | 13621                                                                        |
| <b>Independent reflections</b>                                                | 4540 [ <i>R</i> <sub>int</sub> = 0.0395, <i>R</i> <sub>sigma</sub> = 0.0403] | 1605 [ <i>R</i> <sub>int</sub> = 0.0373, <i>R</i> <sub>sigma</sub> = 0.0425] | 2419 [ <i>R</i> <sub>int</sub> = 0.1408, <i>R</i> <sub>sigma</sub> = 0.2050] | 5021 [ <i>R</i> <sub>int</sub> = 0.0400, <i>R</i> <sub>sigma</sub> = 0.0470] |
| <b>Data/restraints/parameters</b>                                             | 4540/1/331                                                                   | 1605/0/174                                                                   | 2419/0/165                                                                   | 5021/1/313                                                                   |
| <b>Goodness-of-fit on <i>F</i><sup>2</sup></b>                                | 1.044                                                                        | 1.055                                                                        | 0.983                                                                        | 1.060                                                                        |
| <b>Final <i>R</i> indexes [<i>I</i> &gt; 2<math>\sigma</math> (<i>I</i>)]</b> | <i>R</i> <sub>1</sub> = 0.0525, <i>wR</i> <sub>2</sub> = 0.1382              | <i>R</i> <sub>1</sub> = 0.0448, <i>wR</i> <sub>2</sub> = 0.1137              | <i>R</i> <sub>1</sub> = 0.0880, <i>wR</i> <sub>2</sub> = 0.1686              | <i>R</i> <sub>1</sub> = 0.0395, <i>wR</i> <sub>2</sub> = 0.0997              |
| <b>Final <i>R</i> indexes [all data]</b>                                      | <i>R</i> <sub>1</sub> = 0.0541, <i>wR</i> <sub>2</sub> = 0.1411              | <i>R</i> <sub>1</sub> = 0.0590, <i>wR</i> <sub>2</sub> = 0.1218              | <i>R</i> <sub>1</sub> = 0.1663, <i>wR</i> <sub>2</sub> = 0.2184              | <i>R</i> <sub>1</sub> = 0.0452, <i>wR</i> <sub>2</sub> = 0.1042              |
| <b>Largest diff. peak/hole / e Å<sup>-3</sup></b>                             | 0.44/-0.28                                                                   | 0.17/-0.17                                                                   | 0.29/-0.33                                                                   | 0.17/-0.23                                                                   |
| <b>Flack parameter</b>                                                        | 0.0(2)                                                                       |                                                                              |                                                                              | -0.11(13)                                                                    |
| <b>CCDC Deposit Number</b>                                                    |                                                                              |                                                                              |                                                                              |                                                                              |

| Identification code                                                            | PhOTHPDPP <i>N</i> -Hex                                                      | PhOMeDPP <i>N</i> -Boc                                                       | PhOBocDPP <i>N</i> -Boc                                                      |
|--------------------------------------------------------------------------------|------------------------------------------------------------------------------|------------------------------------------------------------------------------|------------------------------------------------------------------------------|
| <b>Empirical formula</b>                                                       | C <sub>40</sub> H <sub>52</sub> N <sub>2</sub> O <sub>6</sub>                | C <sub>30</sub> H <sub>32</sub> N <sub>2</sub> O <sub>8</sub>                | C <sub>38</sub> H <sub>44</sub> N <sub>2</sub> O <sub>12</sub>               |
| <b>Formula weight</b>                                                          | 656.83                                                                       | 548.57                                                                       | 720.75                                                                       |
| <b>Temperature/K</b>                                                           | 120(2)                                                                       | 120(2)                                                                       | 120(2)                                                                       |
| <b>Crystal system</b>                                                          | monoclinic                                                                   | monoclinic                                                                   | Monoclinic                                                                   |
| <b>Space group</b>                                                             | <i>P</i> 2 <sub>1</sub> / <i>c</i>                                           | <i>P</i> 2 <sub>1</sub> / <i>n</i>                                           | <i>I</i> 2/ <i>a</i>                                                         |
| <b><i>a</i>/Å</b>                                                              | 12.4391(17)                                                                  | 6.2882(2)                                                                    | 16.4073(9)                                                                   |
| <b><i>b</i>/Å</b>                                                              | 15.1213(15)                                                                  | 22.9444(5)                                                                   | 10.3312(4)                                                                   |
| <b><i>c</i>/Å</b>                                                              | 9.5874(8)                                                                    | 9.3448(2)                                                                    | 21.7327(10)                                                                  |
| <b><math>\alpha</math>/°</b>                                                   | 90                                                                           | 90                                                                           | 90                                                                           |
| <b><math>\beta</math>/°</b>                                                    | 96.470(10)                                                                   | 96.832(2)                                                                    | 91.113(5)                                                                    |
| <b><math>\gamma</math>/°</b>                                                   | 90                                                                           | 90                                                                           | 90                                                                           |
| <b>Volume/Å<sup>3</sup></b>                                                    | 1791.9(3)                                                                    | 1338.68(6)                                                                   | 3683.2(3)                                                                    |
| <b>Z (Z')</b>                                                                  | 2 (0.5)                                                                      | 2 (0.5)                                                                      | 4 (0.5)                                                                      |
| <b><math>\rho_{\text{calc}}</math> g/cm<sup>3</sup></b>                        | 1.217                                                                        | 1.361                                                                        | 1.300                                                                        |
| <b><math>\mu</math>/mm<sup>-1</sup></b>                                        | 0.647                                                                        | 0.093                                                                        | 0.808                                                                        |
| <b><i>F</i>(000)</b>                                                           | 708.0                                                                        | 580.0                                                                        | 1528.0                                                                       |
| <b>Crystal size/mm</b>                                                         | 0.456 × 0.187 × 0.03                                                         | 0.15 × 0.03 × 0.01                                                           | 0.221 × 0.125 × 0.053                                                        |
| <b>Radiation type</b>                                                          | CuK $\alpha$                                                                 | synchrotron                                                                  | CuK $\alpha$                                                                 |
| <b>2<math>\theta</math> range for data collection/°</b>                        | 7.152 to 153.616                                                             | 6.692 to 63.58                                                               | 8.138 to 146.906                                                             |
| <b>Index ranges</b>                                                            | -15 ≤ <i>h</i> ≤ 15, -18 ≤ <i>k</i> ≤ 18, -10 ≤ <i>l</i> ≤ 11                | -9 ≤ <i>h</i> ≤ 7, -35 ≤ <i>k</i> ≤ 34, -12 ≤ <i>l</i> ≤ 14                  | -19 ≤ <i>h</i> ≤ 15, -12 ≤ <i>k</i> ≤ 8, -20 ≤ <i>l</i> ≤ 27                 |
| <b>Reflections collected</b>                                                   | 18027                                                                        | 16657                                                                        | 6992                                                                         |
| <b>Independent reflections</b>                                                 | 3626 [ <i>R</i> <sub>int</sub> = 0.0349, <i>R</i> <sub>sigma</sub> = 0.0217] | 4316 [ <i>R</i> <sub>int</sub> = 0.0413, <i>R</i> <sub>sigma</sub> = 0.0333] | 3595 [ <i>R</i> <sub>int</sub> = 0.0259, <i>R</i> <sub>sigma</sub> = 0.0333] |
| <b>Data/restraints/parameters</b>                                              | 3626/1116/325                                                                | 4316/0/205                                                                   | 3595/0/241                                                                   |
| <b>Goodness-of-fit on <i>F</i><sup>2</sup></b>                                 | 1.069                                                                        | 1.080                                                                        | 1.031                                                                        |
| <b>Final <i>R</i> indexes [<i>I</i> &gt;= 2<math>\sigma</math> (<i>I</i>)]</b> | <i>R</i> <sub>1</sub> = 0.0850, <i>wR</i> <sub>2</sub> = 0.2398              | <i>R</i> <sub>1</sub> = 0.0479, <i>wR</i> <sub>2</sub> = 0.1168              | <i>R</i> <sub>1</sub> = 0.0452, <i>wR</i> <sub>2</sub> = 0.1122              |
| <b>Final <i>R</i> indexes [all data]</b>                                       | <i>R</i> <sub>1</sub> = 0.1027, <i>wR</i> <sub>2</sub> = 0.2621              | <i>R</i> <sub>1</sub> = 0.0645, <i>wR</i> <sub>2</sub> = 0.1237              | <i>R</i> <sub>1</sub> = 0.0530, <i>wR</i> <sub>2</sub> = 0.1184              |
| <b>Largest diff. peak/hole / e Å<sup>-3</sup></b>                              | 0.37/-0.31                                                                   | 0.41/-0.20                                                                   | 0.44/-0.27                                                                   |
| <b>Flack parameter</b>                                                         |                                                                              |                                                                              |                                                                              |
| <b>CCDC Deposit Number</b>                                                     |                                                                              |                                                                              |                                                                              |

## 7. Computational calculations

### PhDPP N-H

Separation distances and electronic coupling for unique neighbouring molecules:

| $R_{\text{centre-centre}}$ (Å) | $V$ (meV) |
|--------------------------------|-----------|
| 5.5404                         | 14.12     |
| 9.049                          | 0.41      |
| 9.189                          | 0.40      |

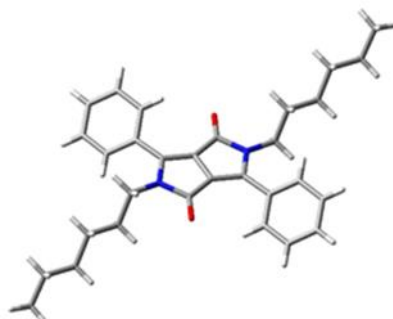

### PhOMeDPP N-2MB

Separation distances and electronic coupling for unique neighbouring molecules:

| $R_{\text{centre-centre}}$ (Å) | $V$ (meV) |
|--------------------------------|-----------|
| 11.036                         | 0.785     |
| 8.002                          | 8.004     |
| 8.033                          | 3.509     |

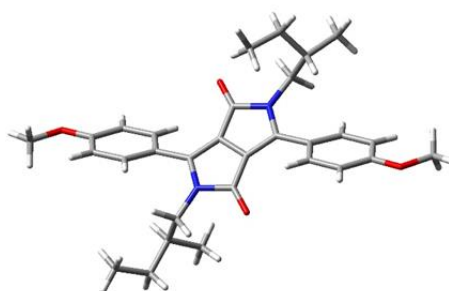

### PhOMeDPP N-Hex

Separation distances and electronic coupling for unique neighbouring molecules:

| $R_{\text{centre-centre}}$ (Å) | $V$ (meV) |
|--------------------------------|-----------|
| 7.896                          | 4.636     |
| 7.896                          | 4.636     |
| 11.497                         | 0.023     |

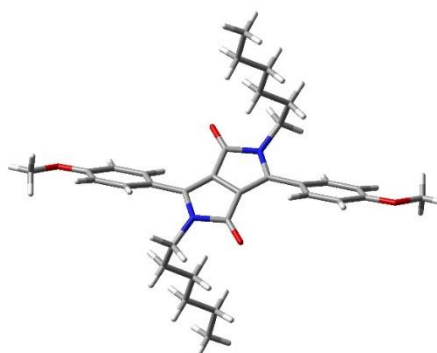

### PhOMeDPP *N*-Boc

Separation distances and electronic coupling for unique neighbouring molecules:

| $R_{\text{centre-centre}}$ (Å) | $V$ (meV) |
|--------------------------------|-----------|
| 16.536                         | 7.314     |
| 6.288                          | 79.3      |
| 11.878                         | 7.180     |

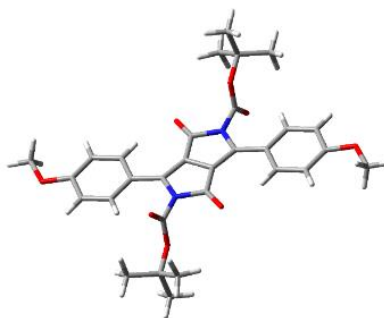

### PhOHDPP *N*-Hex

Separation distances and electronic coupling for unique neighbouring molecules:

| $R_{\text{centre-centre}}$ (Å) | $V$ (meV) |
|--------------------------------|-----------|
| 16.028                         | 0         |
| 7.831                          | 1.407     |
| 10.407                         | 12.231    |
| 5.280                          | 5.564     |

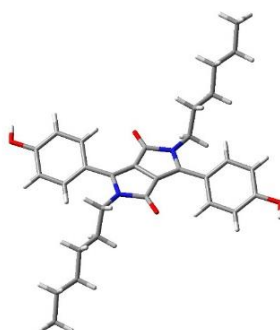

### PhOHDPP *N*-2MB

Separation distances and electronic coupling for unique neighbouring molecules:

| $R_{\text{centre-centre}}$ (Å) | $V$ (meV) |
|--------------------------------|-----------|
| 11.321                         | 2.101     |
| 8.589                          | 8.832     |
| 8.231                          | 0.803     |
| 8.231                          | 0.803     |
| 10.877                         | 0.081     |

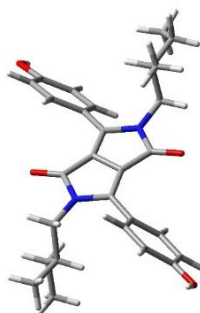

### PhOTHPDPP *N*-Hex

Separation distances and electronic coupling for unique neighbouring molecules:

| $R_{\text{centre-centre}}$ (Å) | $V$ (meV) |
|--------------------------------|-----------|
| 14.83                          | 0.086     |
| 8.95                           | 4.855     |
| 8.95                           | 4.86      |
| 9.59                           | 16.451    |

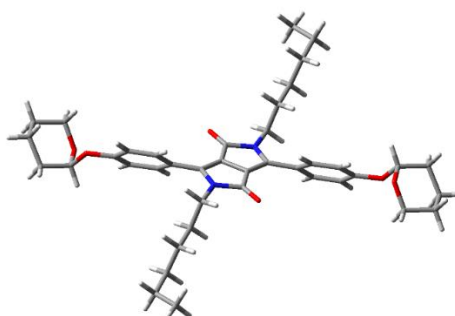

### PhOBocDPP *N*-Boc

Separation distances and electronic coupling for unique neighbouring molecules:

| $R_{\text{centre-centre}}$ (Å) | $V$ (meV) |
|--------------------------------|-----------|
| 12.03                          | 1.153     |
| 12.03                          | 1.153     |
| 8.20                           | 5.656     |
| 10.33                          | 43.075    |

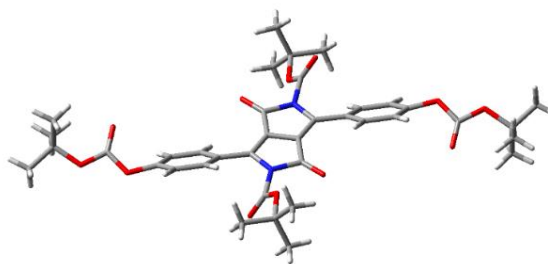

### PhOMeDPP *N*-Alkyl calculated electron density distribution of frontier molecular orbitals

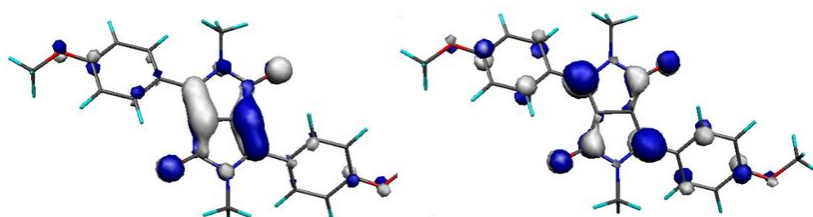

HOMO

LUMO

### PhOHDPP *N*-Alkyl calculated electron density distribution of frontier molecular orbitals

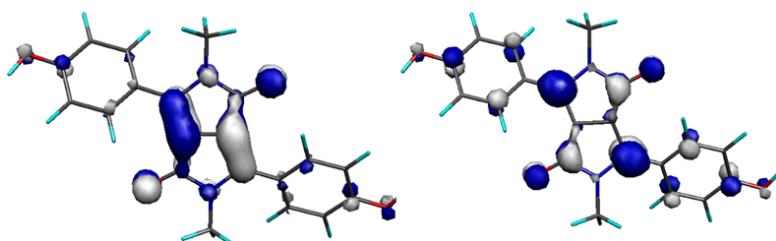

HOMO

LUMO

### PhOMeDPP *N*-Boc calculated electron density distribution of frontier molecular orbitals

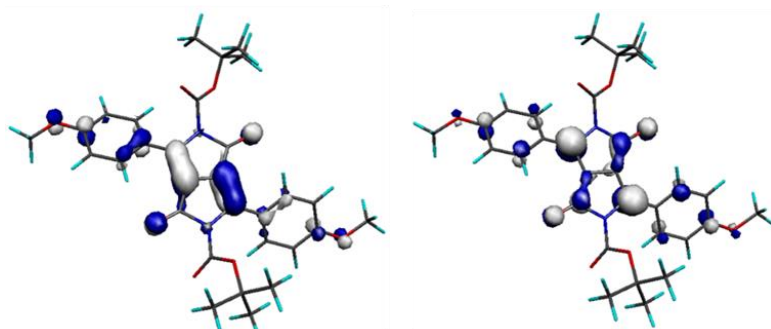

HOMO

LUMO

**PhOBocDPP N-Boc** calculated electron density distribution of frontier molecular orbitals

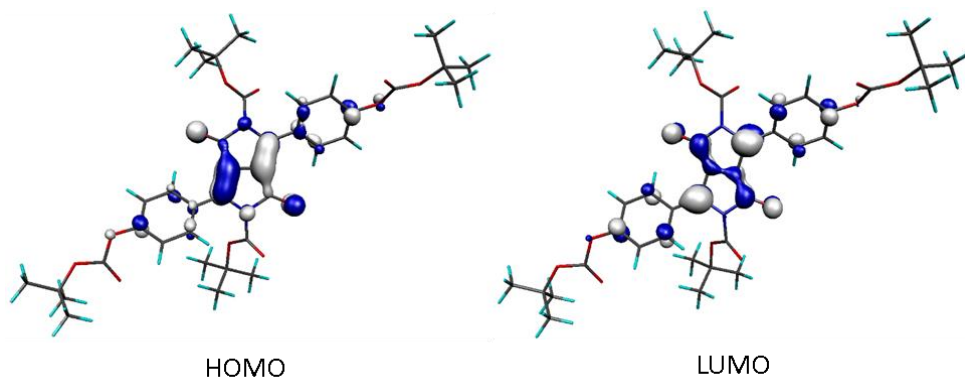

**PhOThPDPP N-Hex** calculated electron density distribution of frontier molecular orbitals

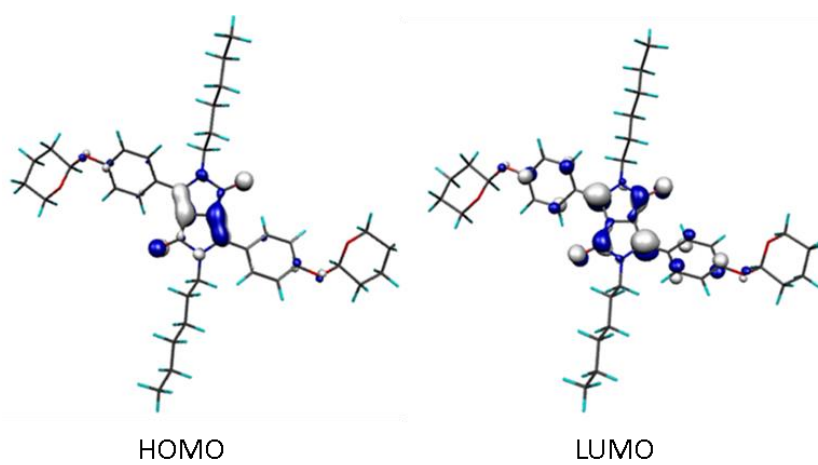

## 8. Supporting Figures

**Fig. S1** Example of DPP-Aryl angle calculation with a plane on the aryl ring and a plane on the connected lactam

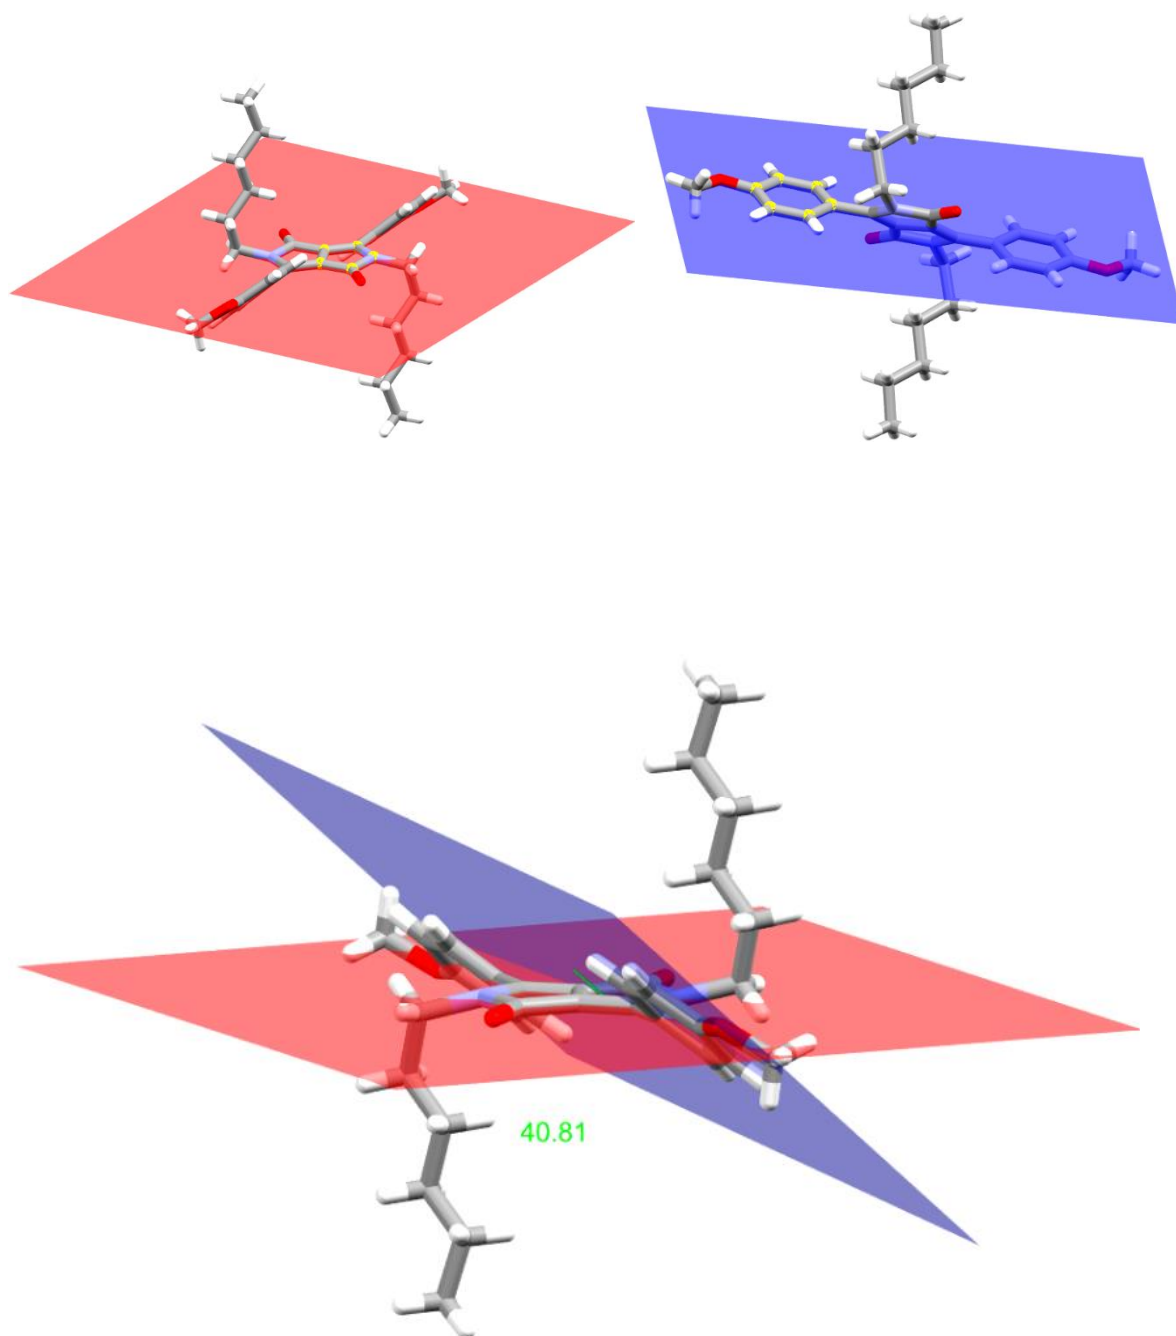



**Fig. S2** Example of DPP-Alkyl angle calculation with a plane on the lactam and a plane on [Clactam – N – C(R)]

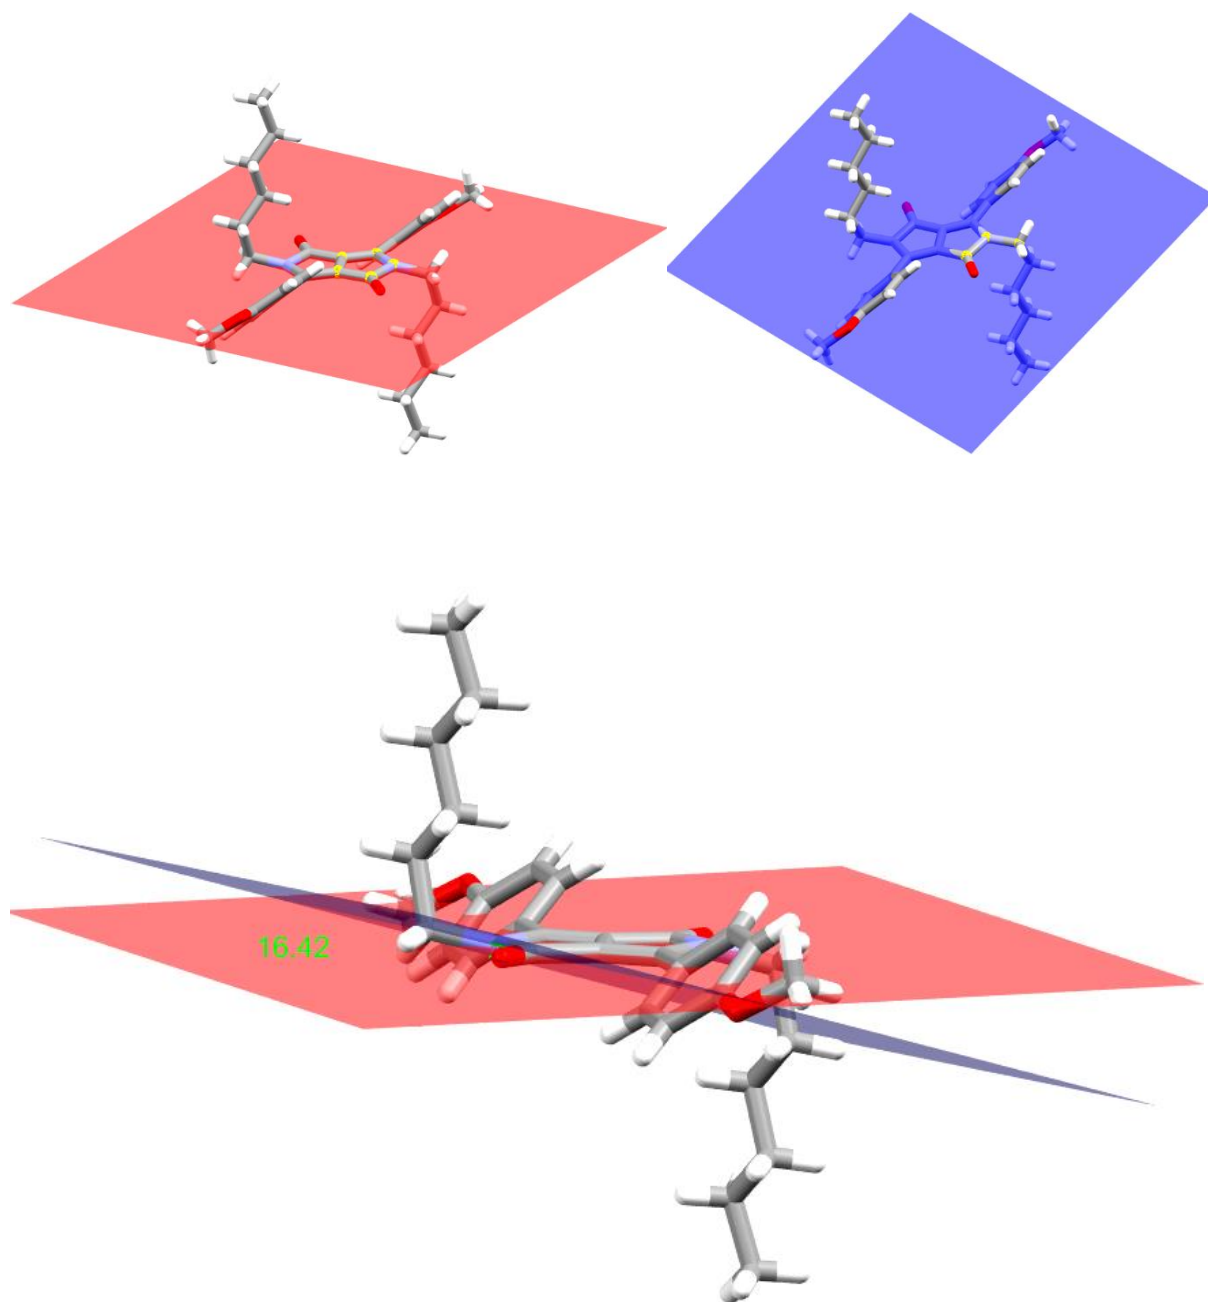

**Fig. S3** Closest  $\pi$ - $\pi$  contact of PhDPP *N* Hex

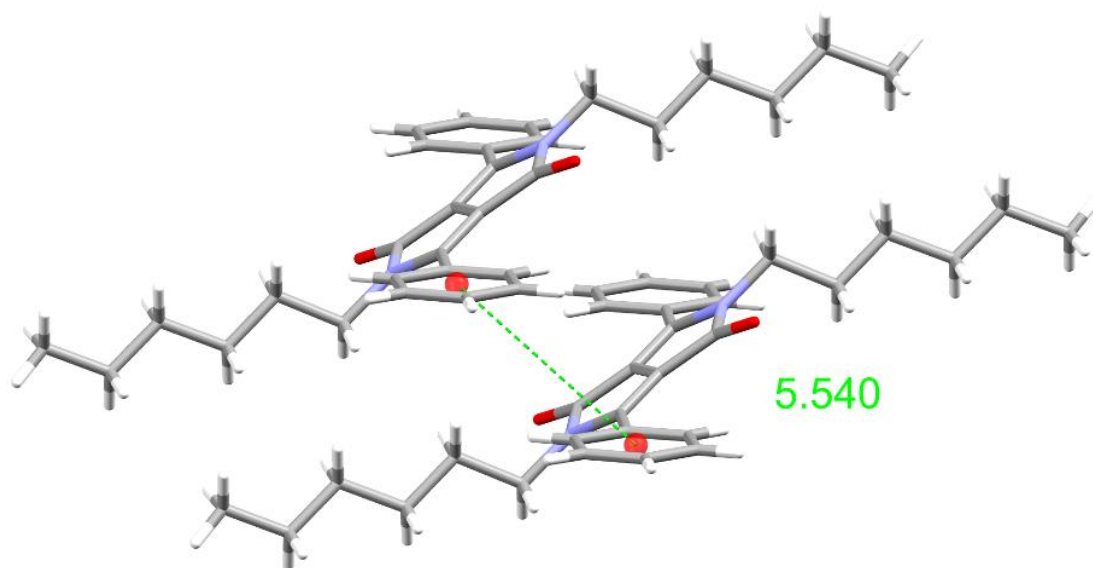

**Fig. S4** Closest  $\pi$ - $\pi$  contact of PhOHDP *N*-Hex

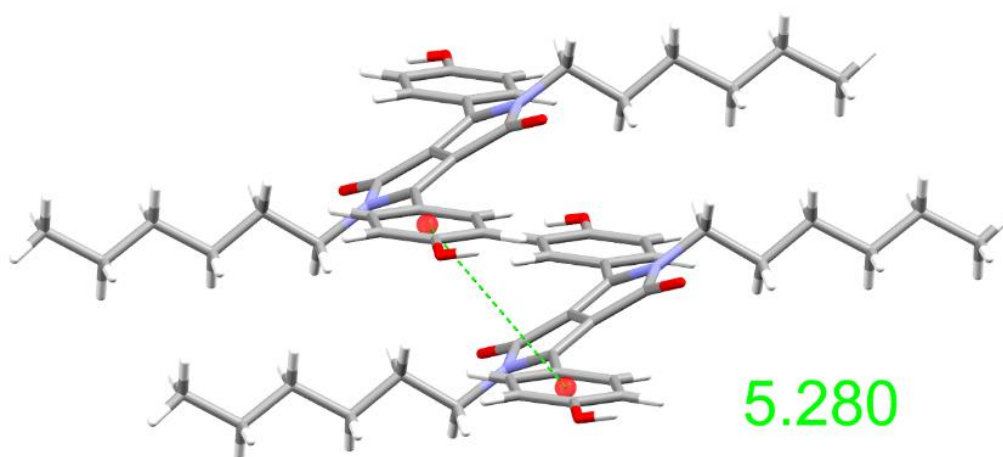

**Fig. S5** Plot of Vertical Displacement vs DPP-Aryl Dihedral Angle for **PhDPP N-Hex**, **PhOMeDPP N-Hex**, **PhOHDPP N-Hex**, **PhOTHPDPP N-Hex**, **PhOHDPP N-2MB**, **PhOMeDPP N-2MB**, **PhDPP N-Boc**, **PhOMeDPP N-Boc** and **PhOBocDPP N-Boc**

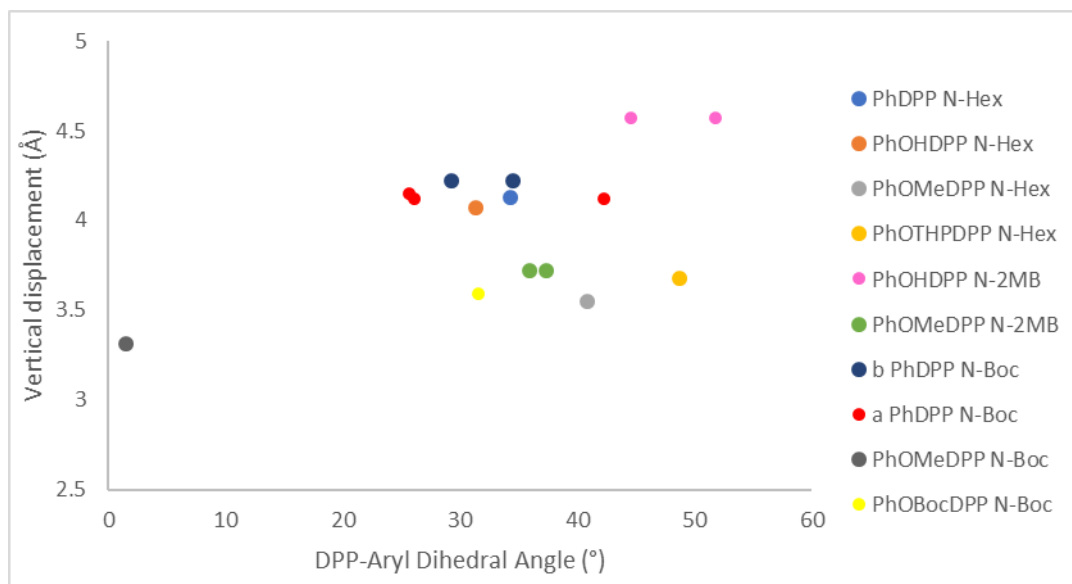

**Fig. S6** Plot of Overall Displacement vs DPP-Aryl Dihedral Angle for **PhDPP N-Hex**, **PhOMeDPP N-Hex**, **PhOHDPP N-Hex**, **PhOTHPDPP N-Hex**, **PhOHDPP N-2MB**, **PhOMeDPP N-2MB**, **PhDPP N-Boc**, **PhOMeDPP N-Boc** and **PhOBocDPP N-Boc**

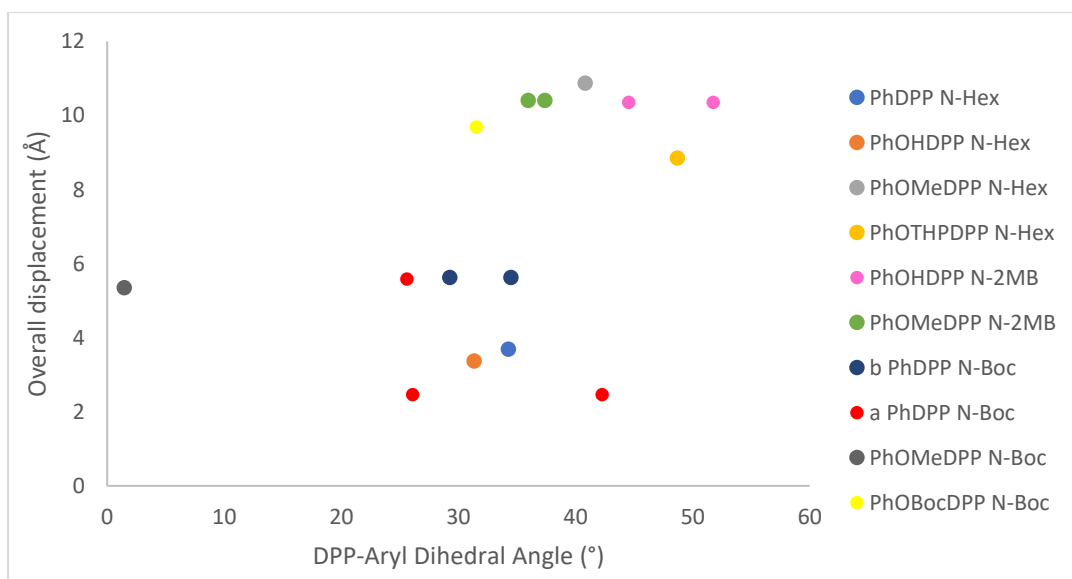

**Fig. S7** Plot of Lateral Displacement vs DPP-Aryl Dihedral Angle for **PhDPP N-Hex**, **PhOMeDPP N-Hex**, **PhOHDPP N-Hex**, **PhOTHPDPP N-Hex**, **PhOHDPP N-2MB**, **PhOMeDPP N-2MB**, **PhDPP N-Boc**, **PhOMeDPP N-Boc** and **PhOBocDPP N-Boc**

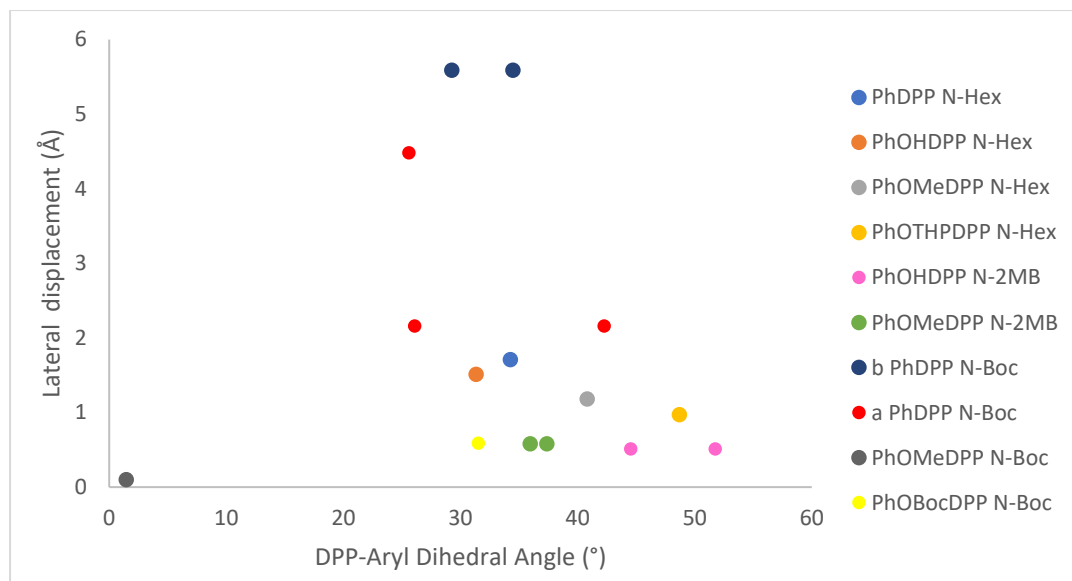

**Fig. S8** Plot of Longitudinal Displacement vs DPP-Aryl Dihedral Angle for **PhDPP N-Hex**, **PhOMeDPP N-Hex**, **PhOHDPP N-Hex**, **PhOTHPDPP N-Hex**, **PhOHDPP N-2MB**, **PhOMeDPP N-2MB**, **PhDPP N-Boc**, **PhOMeDPP N-Boc** and **PhOBocDPP N-Boc**

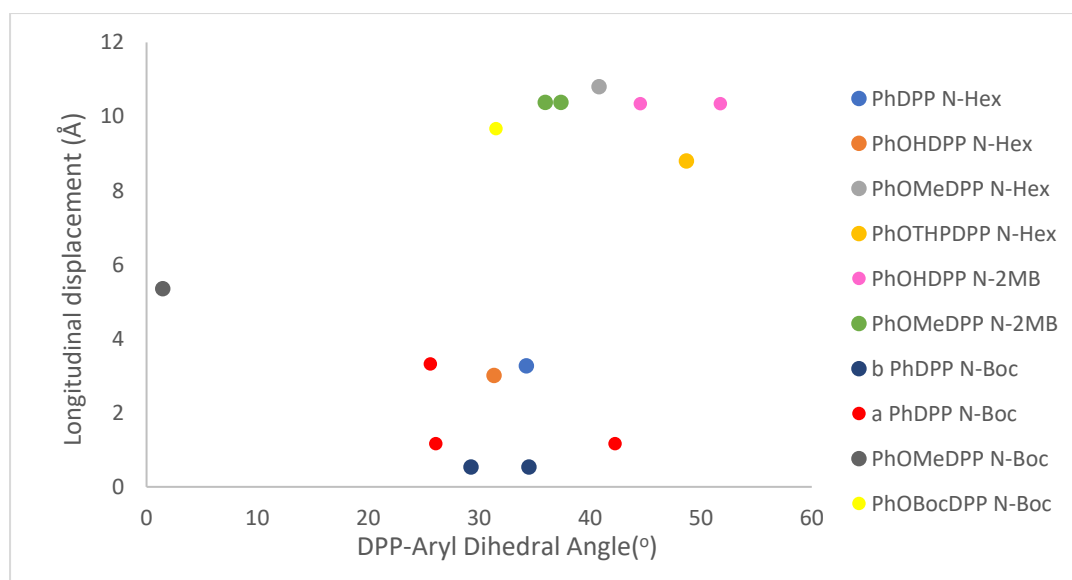

**Fig. S9** Plot of DPP-Alkyl Dihedral Angle vs DPP-Aryl Dihedral Angle for **PhDPP N-Hex**, **PhOMeDPP N-Hex**, **PhOHDPP N-Hex**, **PhOTHPDPP N-Hex**, **PhOHDPP N-2MB**, **PhOMeDPP N-2MB**, **PhDPP N-Boc**, **PhOMeDPP N-Boc** and **PhOBocDPP N-Boc**

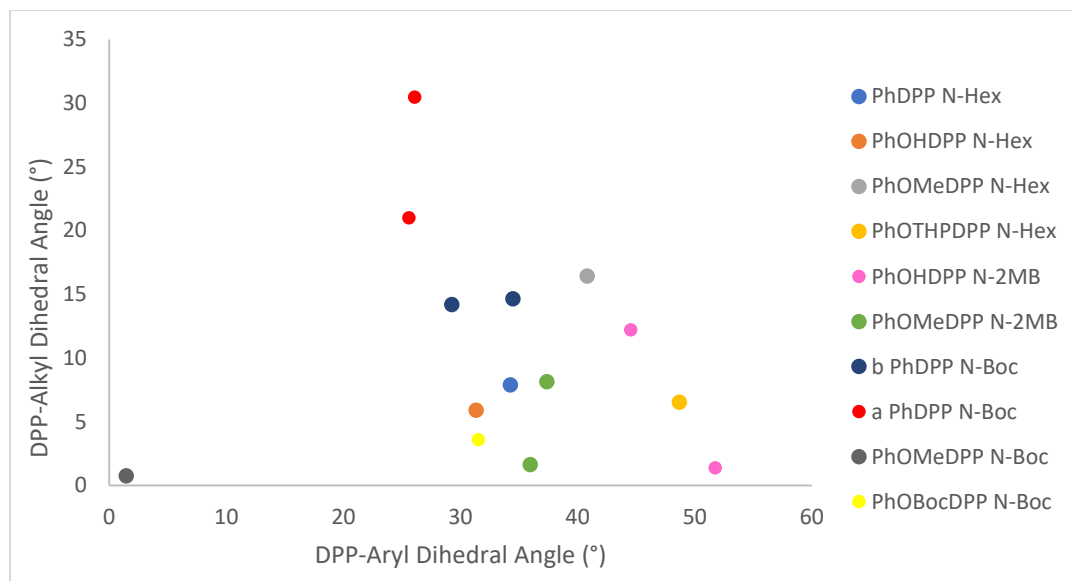

**Fig. S10** Plot of Torsion Angle vs Overall Displacement for **PhDPP N-Hex**, **PhOMeDPP N-Hex**, **PhOHDPP N-Hex**, **PhOTHPDPP N-Hex**, **PhOHDPP N-2MB**, **PhOMeDPP N-2MB**, **PhDPP N-Boc**, **PhOMeDPP N-Boc** and **PhOBocDPP N-Boc**

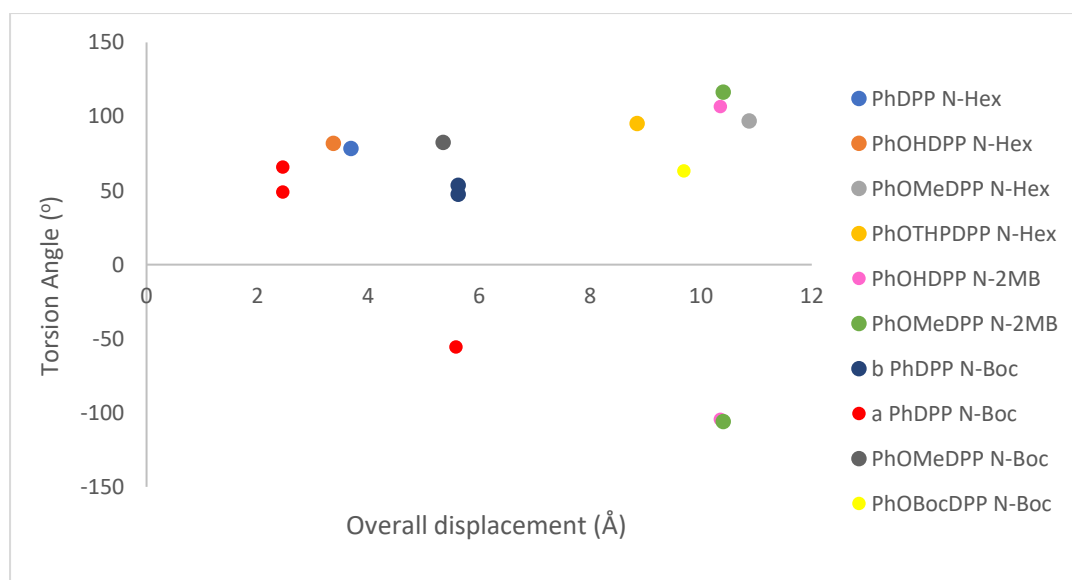

**Fig. S11** Plot of Torsion Angle vs Vertical Displacement for **PhDPP N-Hex**, **PhOMeDPP N-Hex**, **PhOHDPP N-Hex**, **PhOTHPDPP N-Hex**, **PhOHDPP N-2MB**, **PhOMeDPP N-2MB**, **PhDPP N-Boc**, **PhOMeDPP N-Boc** and **PhOBocDPP N-Boc**

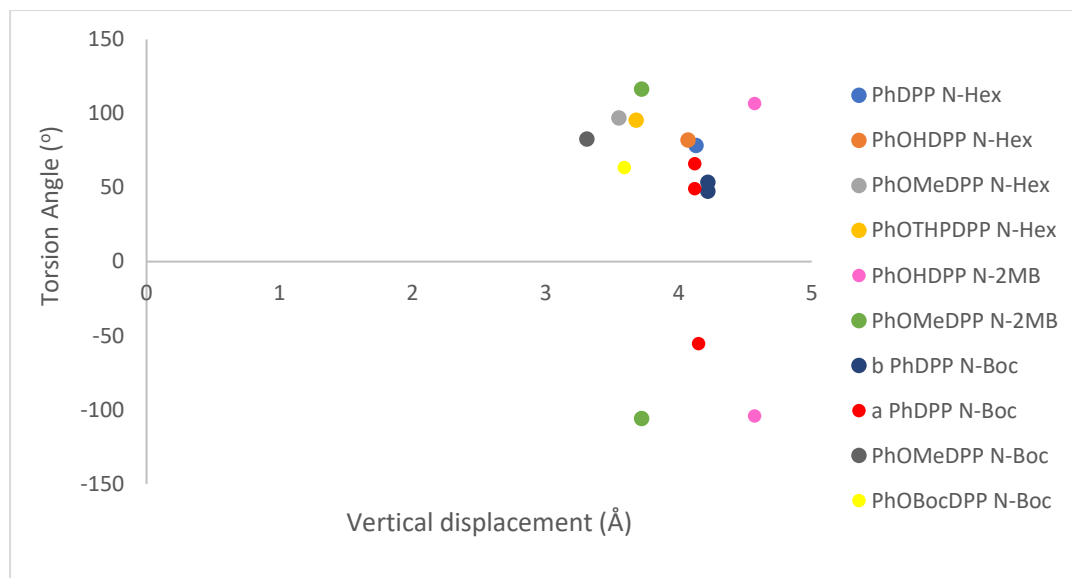

**Fig. S12** Plot of Torsion Angle vs Longitudinal Displacement for **PhDPP N-Hex**, **PhOMeDPP N-Hex**, **PhOHDPP N-Hex**, **PhOTHPDPP N-Hex**, **PhOHDPP N-2MB**, **PhOMeDPP N-2MB**, **PhDPP N-Boc**, **PhOMeDPP N-Boc** and **PhOBocDPP N-Boc**

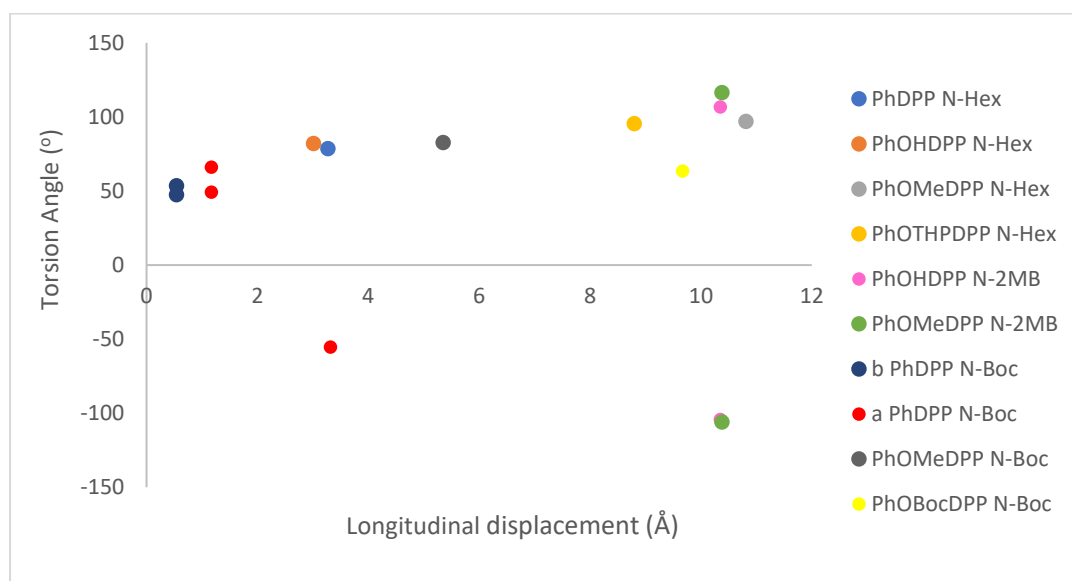

**Fig. S13** Plot of Torsion Angle vs Lateral Displacement for **PhDPP N-Hex**, **PhOMeDPP N-Hex**, **PhOHDPP N-Hex**, **PhOTHPDPP N-Hex**, **PhOHDPP N-2MB**, **PhOMeDPP N-2MB**, **PhDPP N-Boc**, **PhOMeDPP N-Boc** and **PhOBocDPP N-Boc**

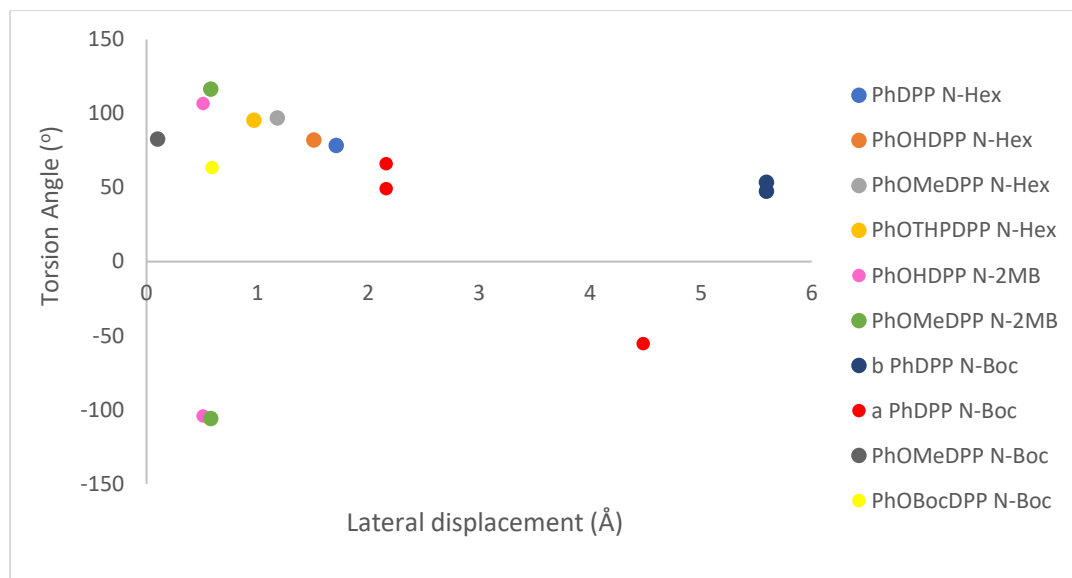

**Fig. S14** Plot of Torsion Angle vs DPP-Aryl Dihedral Angle for **PhDPP N-Hex**, **PhOMeDPP N-Hex**, **PhOHDPP N-Hex**, **PhOTHPDPP N-Hex**, **PhOHDPP N-2MB**, **PhOMeDPP N-2MB**, **PhDPP N-Boc**, **PhOMeDPP N-Boc** and **PhOBocDPP N-Boc**

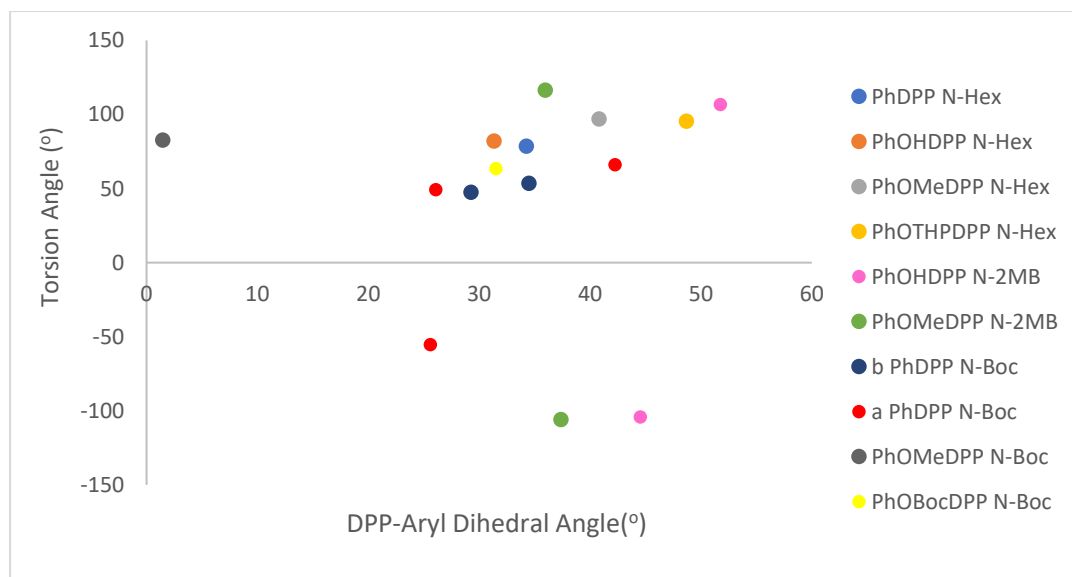

**Fig. S15** Plot of Torsion Angle vs DPP-Alkyl Dihedral Angle for **PhDPP N-Hex**, **PhOMeDPP N-Hex**, **PhOHDPP N-Hex**, **PhOTHPDPP N-Hex**, **PhOHDPP N-2MB**, **PhOMeDPP N-2MB**, **PhDPP N-Boc**, **PhOMeDPP N-Boc** and **PhOBocDPP N-Boc**

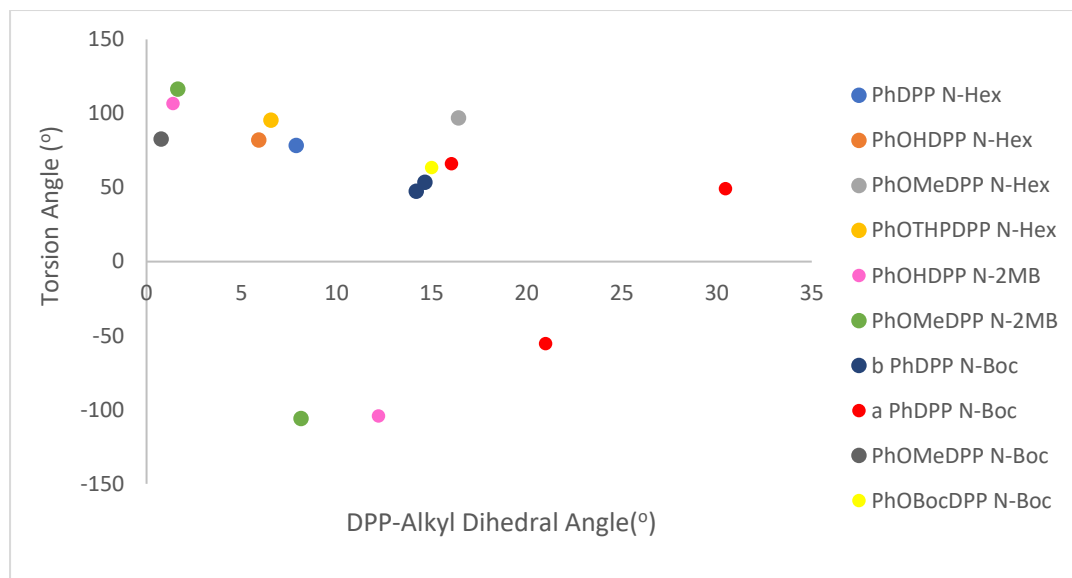

**Fig. S16** Plot of DPP-Alkyl Dihedral Angle(°)vs Longitudinal Displacement for **PhDPP N-Hex**, **PhOMeDPP N-Hex**, **PhOHDPP N-Hex**, **PhOTHPDPP N-Hex**, **PhOHDPP N-2MB**, **PhOMeDPP N-2MB**, **PhDPP N-Boc**, **PhOMeDPP N-Boc** and **PhOBocDPP N-Boc**

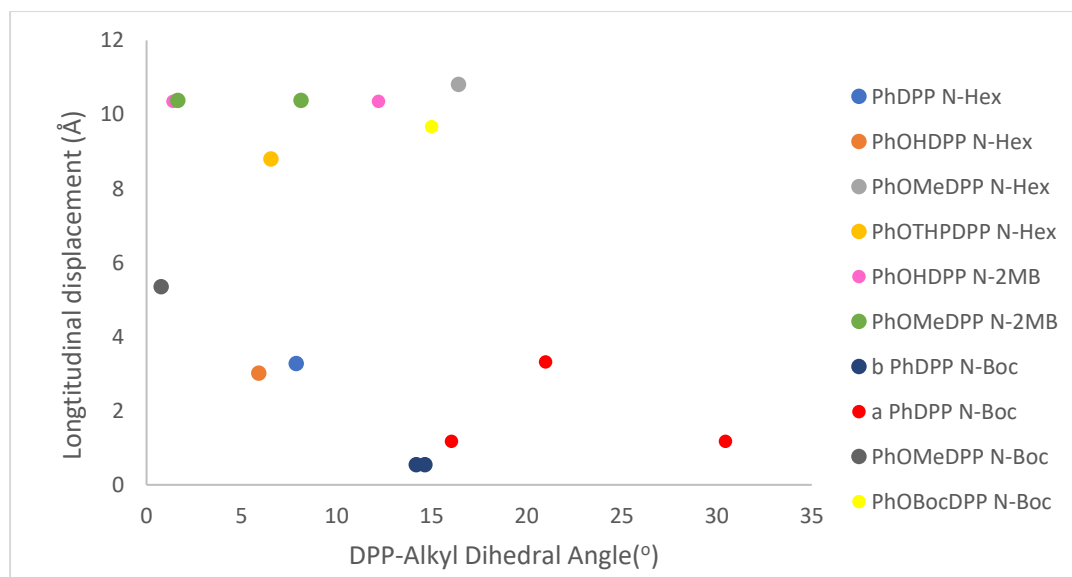



**Fig. S17** Plot of Torsion Angle vs Overall Displacement for **PhDPP N-Hex**, **PhOMeDPP N-Hex**, **PhOHDPP N-Hex**, **PhOTHPDPP N-Hex**, **PhOHDPP N-2MB**, **PhOMeDPP N-2MB**, **PhDPP N-Boc**, **PhOMeDPP N-Boc** and **PhOBocDPP N-Boc**

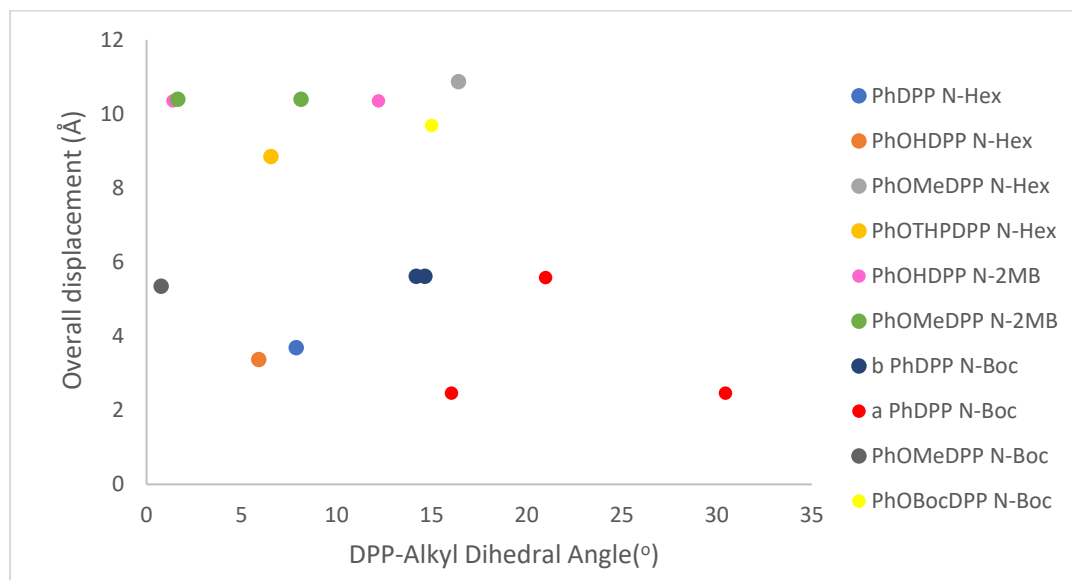

**Fig. S18** Plot of DPP-Alkyl Dihedral Angle vs Vertical Displacement for **PhDPP N-Hex**, **PhOMeDPP N-Hex**, **PhOHDPP N-Hex**, **PhOTHPDPP N-Hex**, **PhOHDPP N-2MB**, **PhOMeDPP N-2MB**, **PhDPP N-Boc**, **PhOMeDPP N-Boc** and **PhOBocDPP N-Boc**

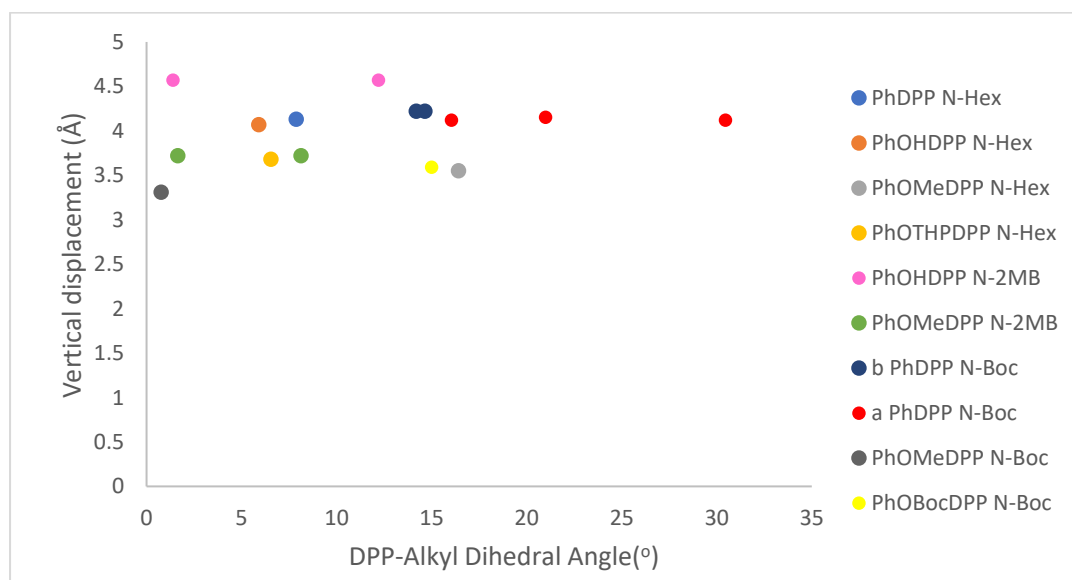

**Fig. S19** Plot of DPP-Alkyl Dihedral Angle vs Lateral Displacement for **PhDPP N-Hex**, **PhOMeDPP N-Hex**, **PhOHDPP N-Hex**, **PhOTHPDPP N-Hex**, **PhOHDPP N-2MB**, **PhOMeDPP N-2MB**, **PhDPP N-Boc**, **PhOMeDPP N-Boc** and **PhOBocDPP N-Boc**

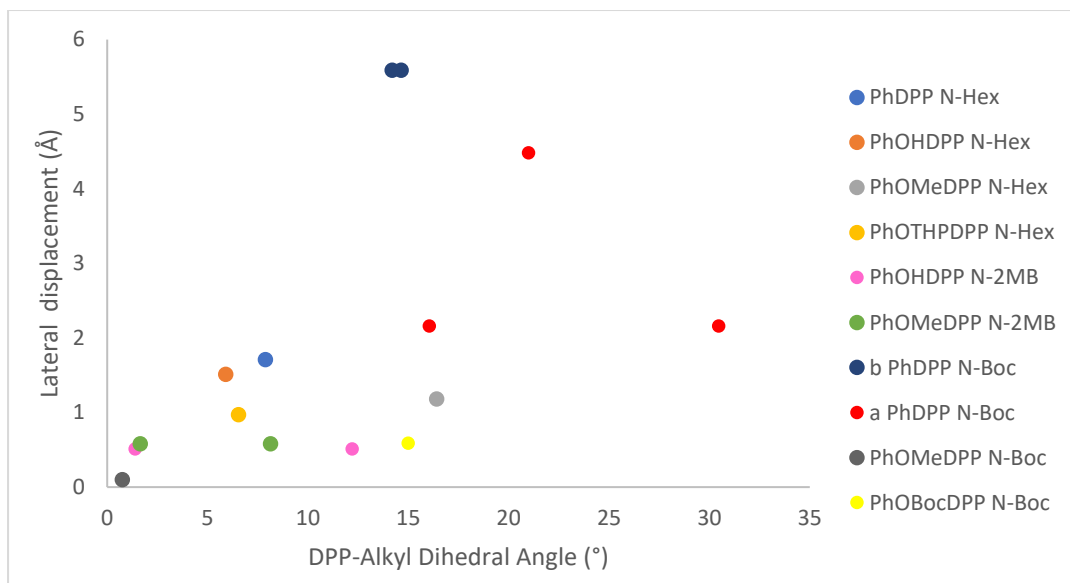

**Fig. S20** Chemical structures of **PhDPP N-Hex** and **PhDPP N-MonoHex**

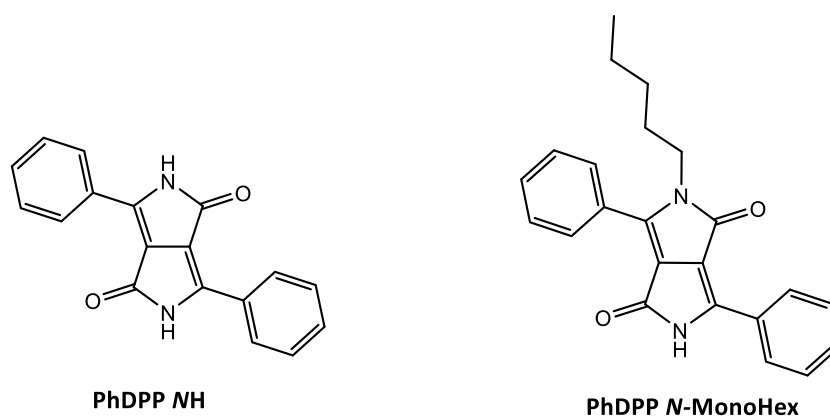

Fig. S21 Hydrogen bonding interactions of PhOHDPP *N*-Hex and PhOHDPP *N*-2MB

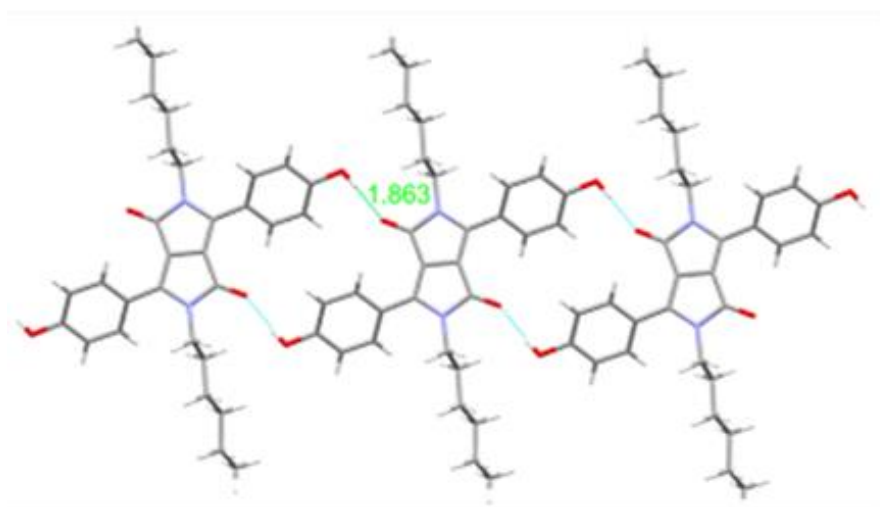

PhOHDPP *N*-Hex

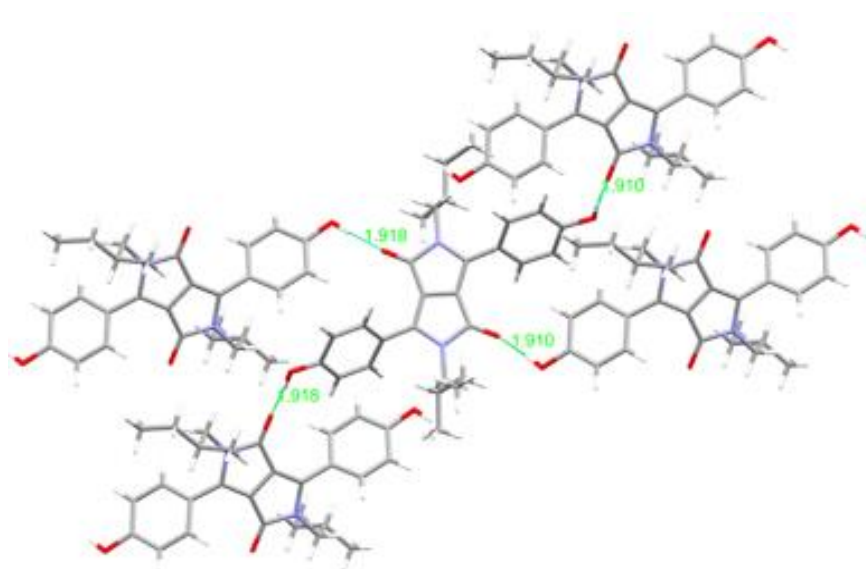

PhOHDPP *N*-2MB

**Fig. S22** Solution vs solid absorption of **PhOMeDPP N-Hex** in THF and DCM

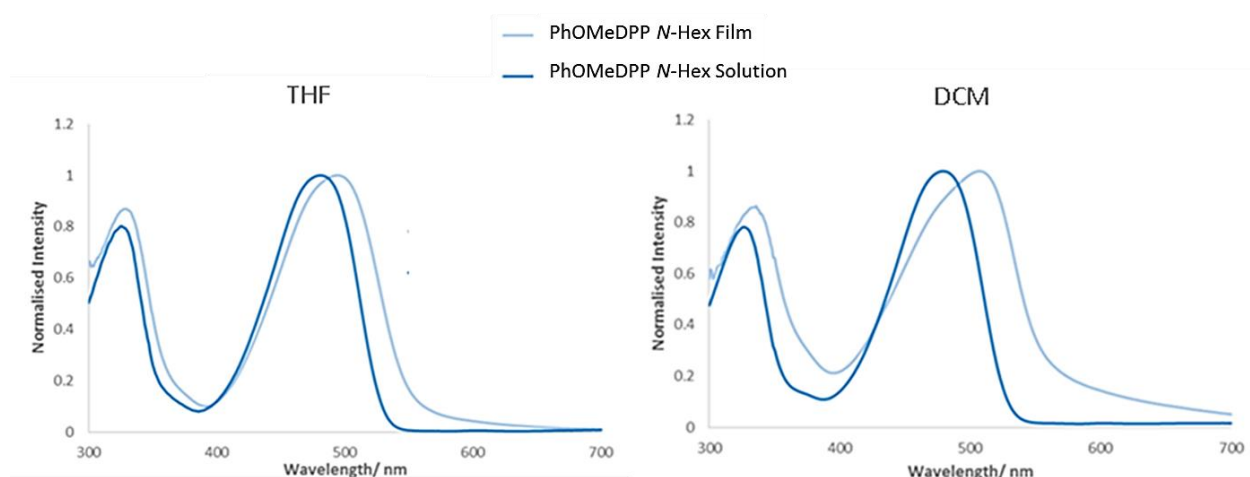

**Fig. S23** Solution vs solid absorption of **PhOMeDPP N-2MB** in THF and DCM

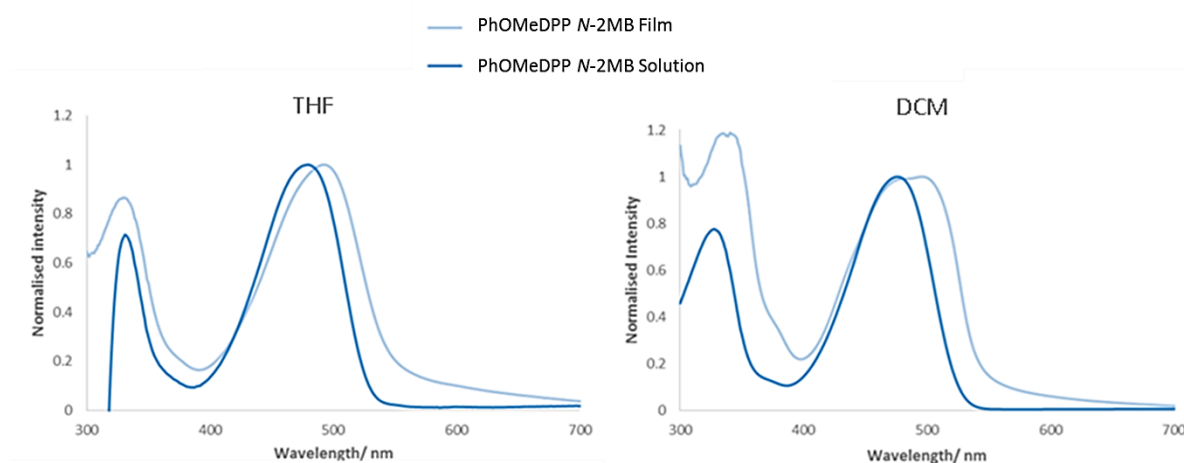

**Fig. S24** Solution vs solid absorption of **PhOMeDPP N-Boc** in THF and DCM

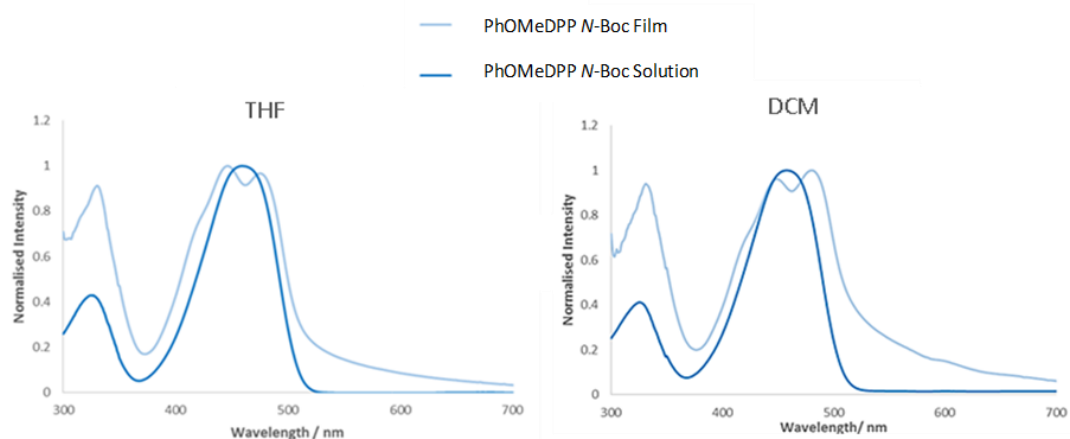

**Fig. S25** Solution vs solid absorption of **PhOTHPDPP N-Hex** in THF and DCM

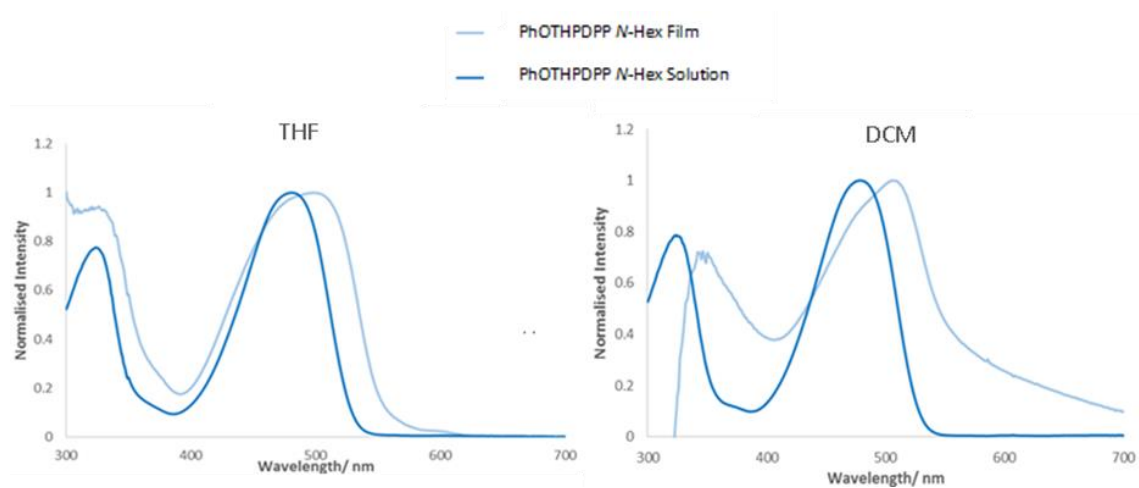

**Fig. S26** Solution vs solid absorption of **PhOBocDPP N-Boc** in DCM

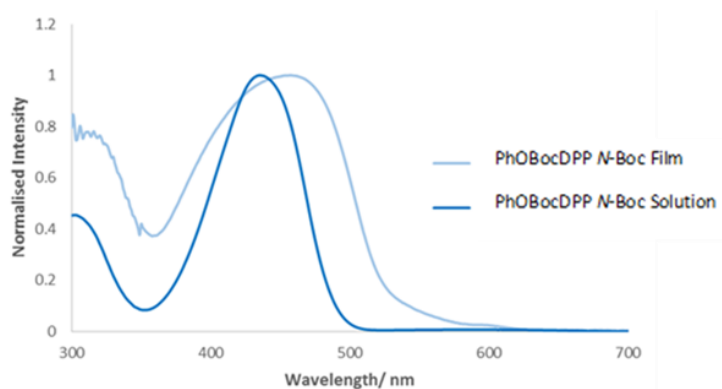

**Fig. S27** Plot of solid-state absorption maxima vs. overall displacement for **PhDPP N-Hex**, **PhOMeDPP N-Hex**, **PhOMeDPP N-2MB**, **PhOHDPP N-2MB**, **PhOMeDPP N-Boc**, **PhOBocDPP N-Boc** and **PhOTHPDPP N-Hex**

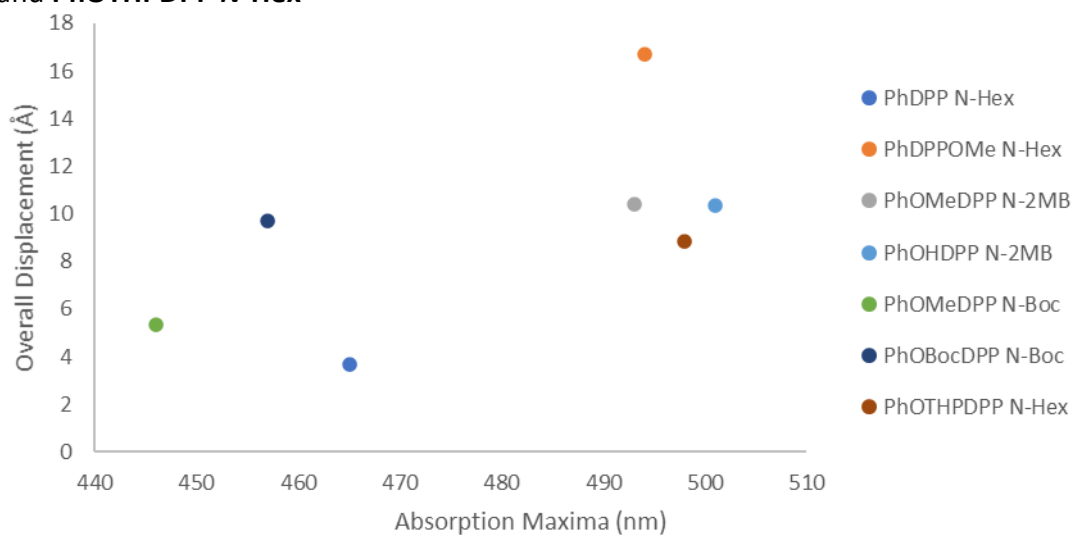

**Fig. S28** Plot of solid-state absorption maxima vs. vertical displacement for **PhDPP N-Hex**, **PhOMeDPP N-Hex**, **PhOMeDPP N-2MB**, **PhOHDPP N-2MB**, **PhOMeDPP N-Boc**, **PhOBocDPP N-Boc** and **PhOTHPDPP N-Hex**

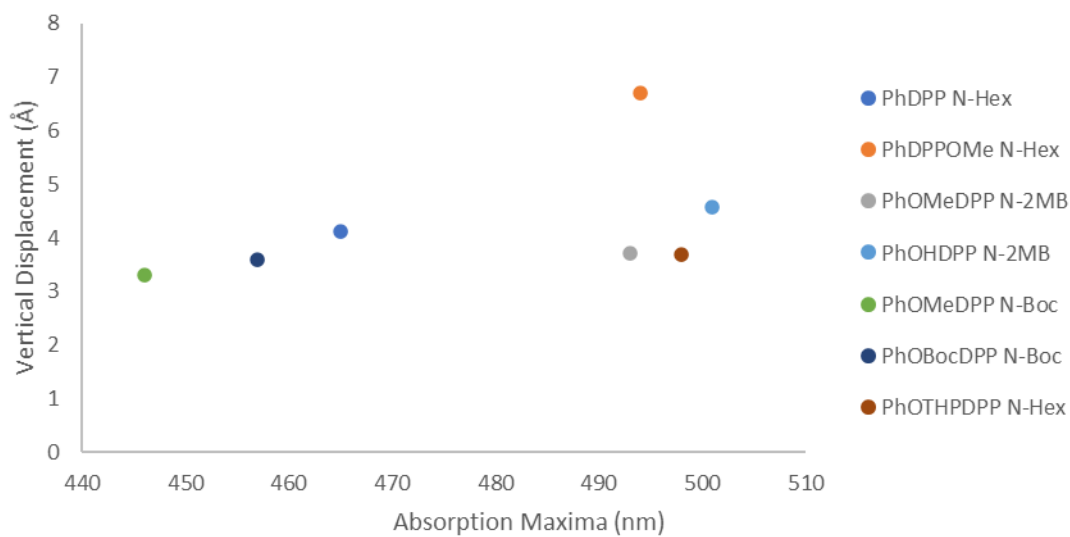

**Fig. S29** Plot of solid-state absorption maxima vs. Longitudinal Displacement for **PhDPP N-Hex**, **PhOMeDPP N-Hex**, **PhOMeDPP N-2MB**, **PhOHDPP N-2MB**, **PhOMeDPP N-Boc**, **PhOBocDPP N-Boc** and **PhOTHPDPP N-Hex**

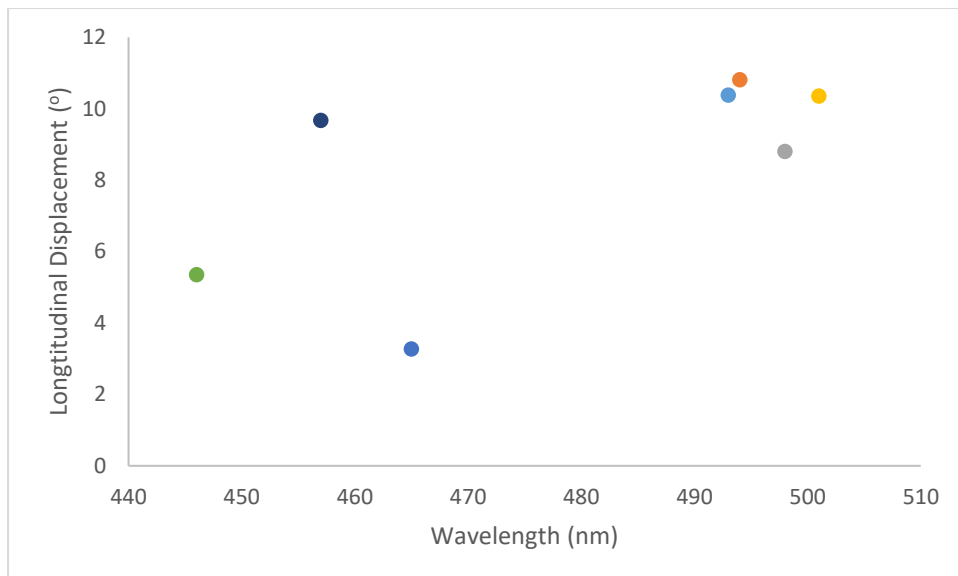

**Fig. S30** Plot of solid-state absorption maxima vs. Lateral Displacement for **PhDPP N-Hex**, **PhOMeDPP N-Hex**, **PhOMeDPP N-2MB**, **PhOHDPP N-2MB**, **PhOMeDPP N-Boc**, **PhOBocDPP N-Boc** and **PhOTHPDPP N-Hex**

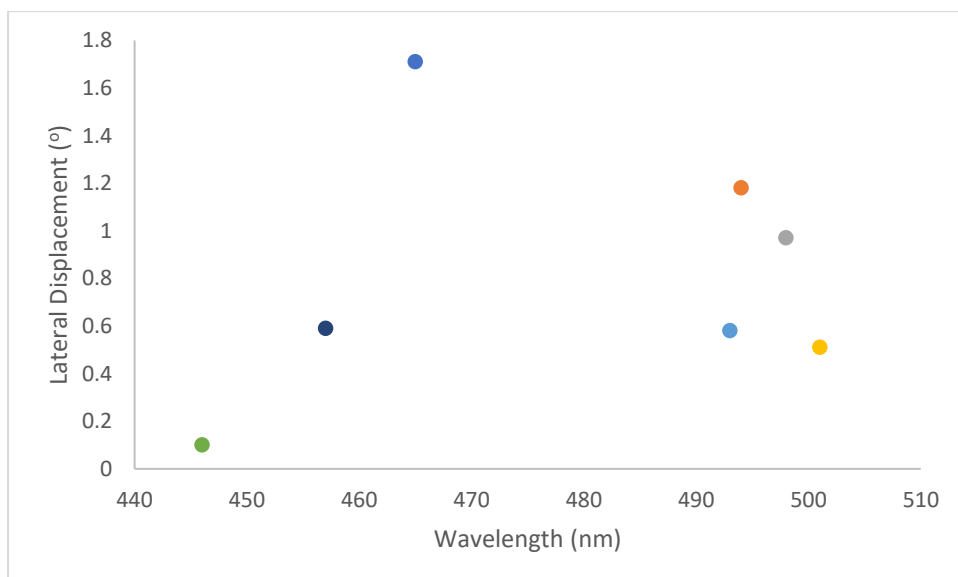

**Fig. S31** Plot of solid-state absorption maxima vs. DPP-Alkyl Dihedral Angle for **PhDPP N-Hex**, **PhOMeDPP N-Hex**, **PhOMeDPP N-2MB**, **PhOHDPP N-2MB**, **PhOMeDPP N-Boc**, **PhOBocDPP N-Boc** and **PhOTHPDPP N-Hex**

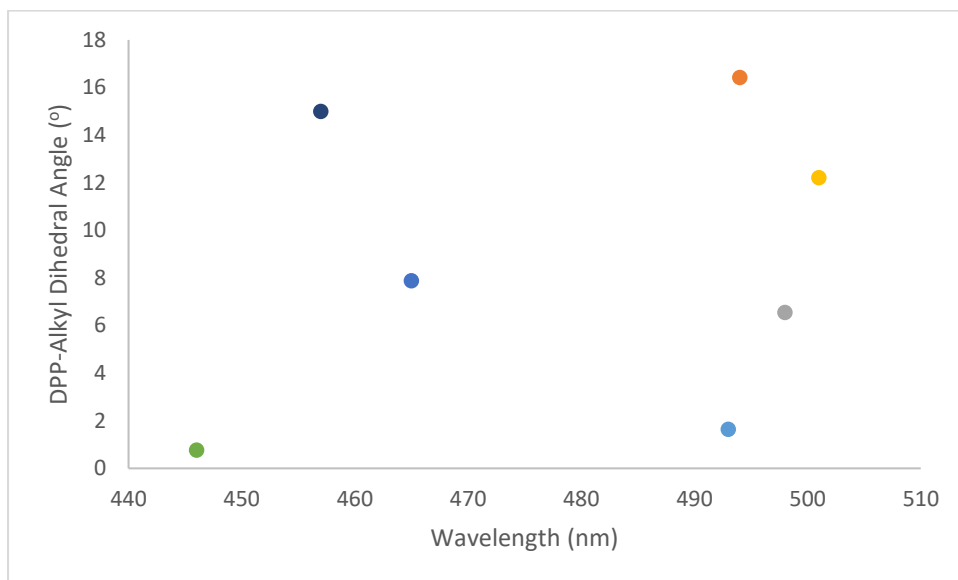

**Fig. S32** Plot of Torsion Angle vs. DPP-Alkyl Dihedral Angle for **PhDPP N-Hex**, **PhOMeDPP N-Hex**, **PhOMeDPP N-2MB**, **PhOHDPP N-2MB**, **PhOMeDPP N-Boc**, **PhOBocDPP N-Boc** and **PhOTHPDPP N-Hex**

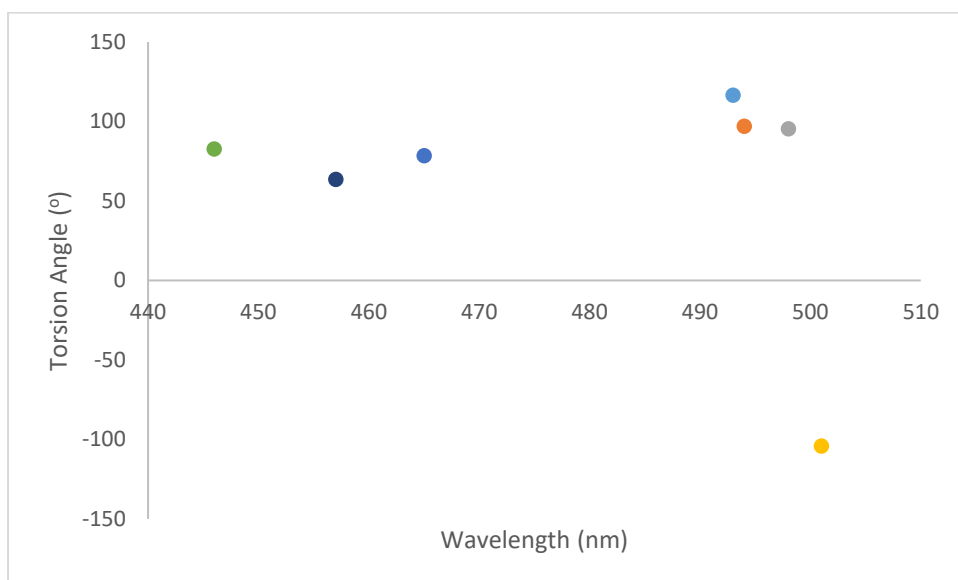



**Fig. S33** Plot of solid-state absorption maxima vs. DPP-aryl angle for **PhDPP N-Hex**, **PhOMeDPP N-Hex**, **PhOMeDPP N-2MB**, **PhOHDPP N-2MB**, **PhOMeDPP N-Boc**, **PhOBocDPP N-Boc** and **PhOTHPDPP N-Hex**

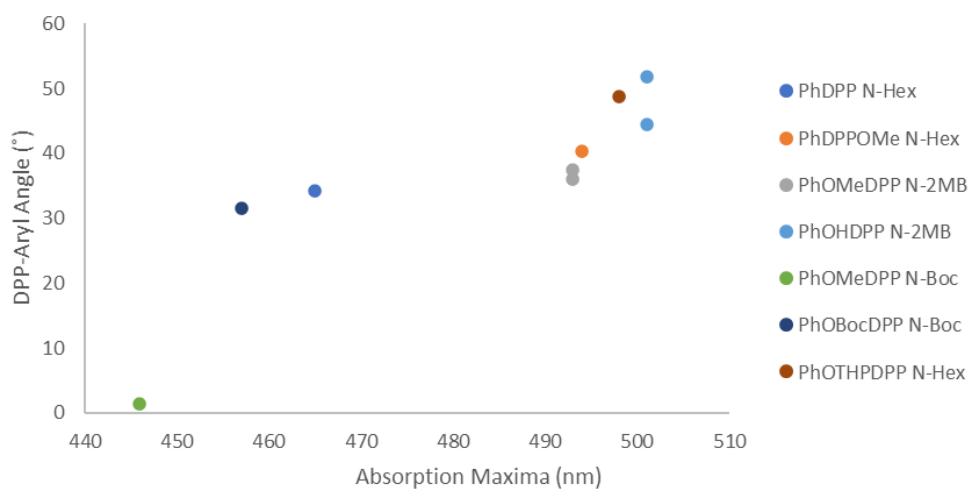

**Fig. S34** Plot of absorption maxima shift vs. overall displacement for **PhDPP N-Hex**, **PhOMeDPP N-Hex**, **PhOMeDPP N-2MB**, **PhOHDPP N-2MB**, **PhOMeDPP N-Boc**, **PhOBocDPP N-Boc** and **PhOTHPDPP N-Hex**

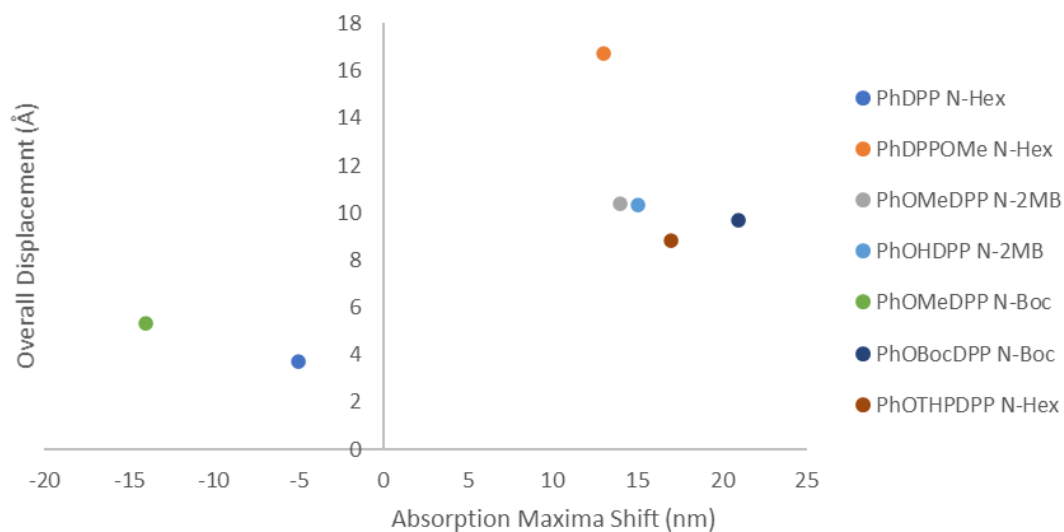

**Fig. S35** Solution vs solid emission and solid absorption of **PhDPP N-Hex** in THF

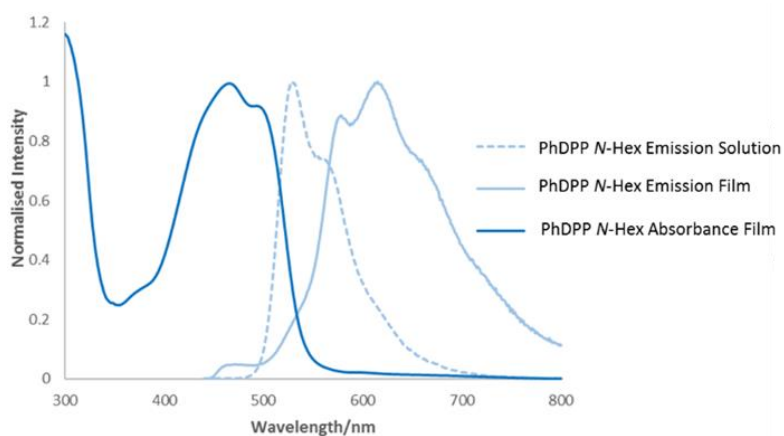

**Fig. S36** Solution vs solid emission and solid absorption of **PhOMeDPP N-Hex** in THF

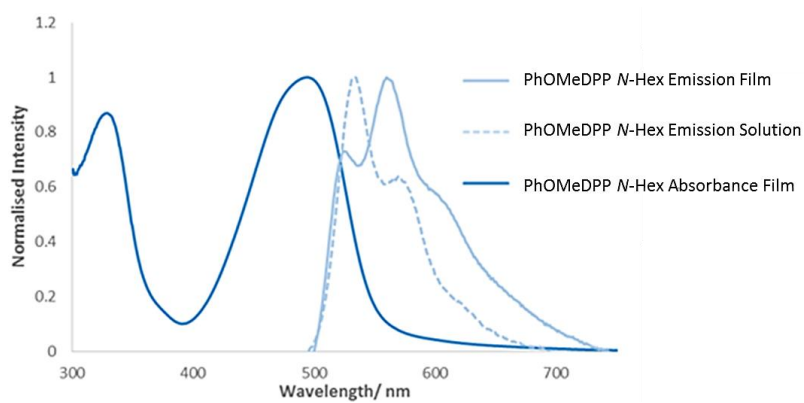

**Fig. S37** Solution vs solid emission and solid absorption of **PhOMeDPP N-Boc** in THF and DCM

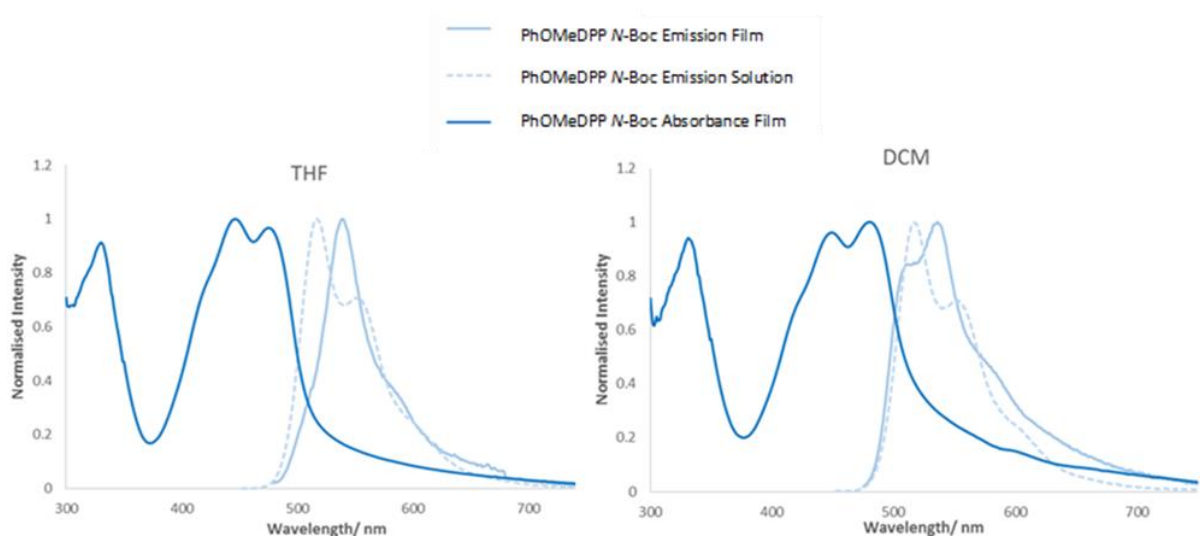

**Fig. S38** Solution vs solid emission and solid absorption of **PhOBocDPP N-Boc** in THF

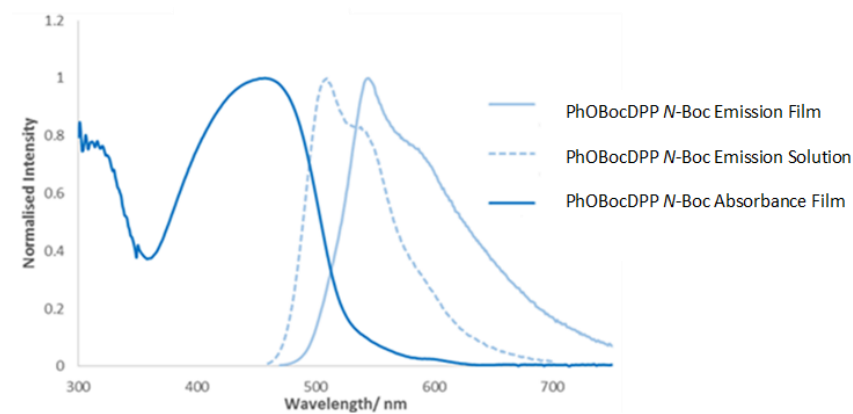

**Fig. S39** Solution vs solid emission and solid absorption of **PhOTHPDPP N-Hex** in THF

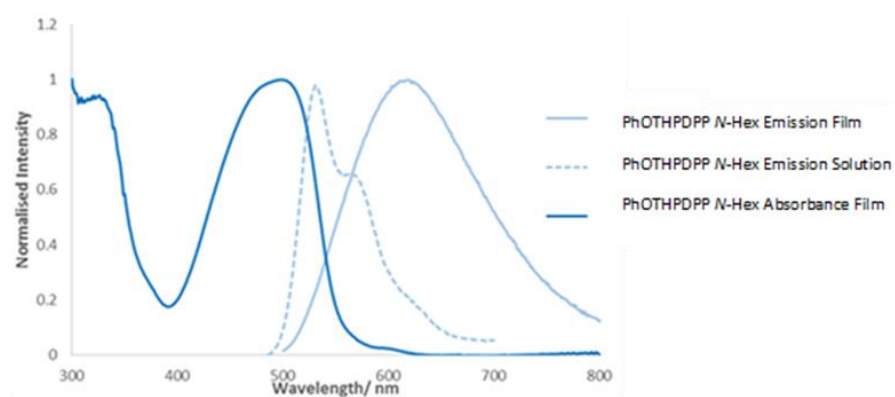

**Fig. S40** Plot of solid-state emission maxima vs. vertical displacement for **PhDPP N-Hex**, **PhOMeDPP N-Hex**, **PhOMeDPP N-2MB**, **PhOMeDPP N-Boc**, **PhOBocDPP N-Boc** and **PhOTHPDPP N-Hex**

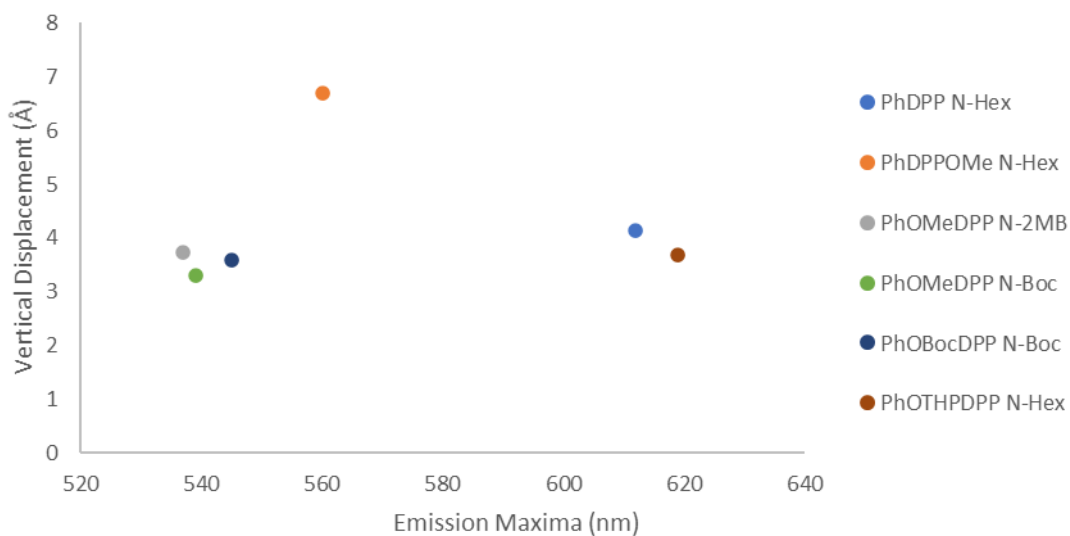

**Fig. S41** Plot of solid-state emission maxima vs. overall displacement for **PhDPP N-Hex**, **PhOMeDPP N-Hex**, **PhOMeDPP N-2MB**, **PhOMeDPP N-Boc**, **PhOBocDPP N-Boc** and **PhOTHPDPP N-Hex**

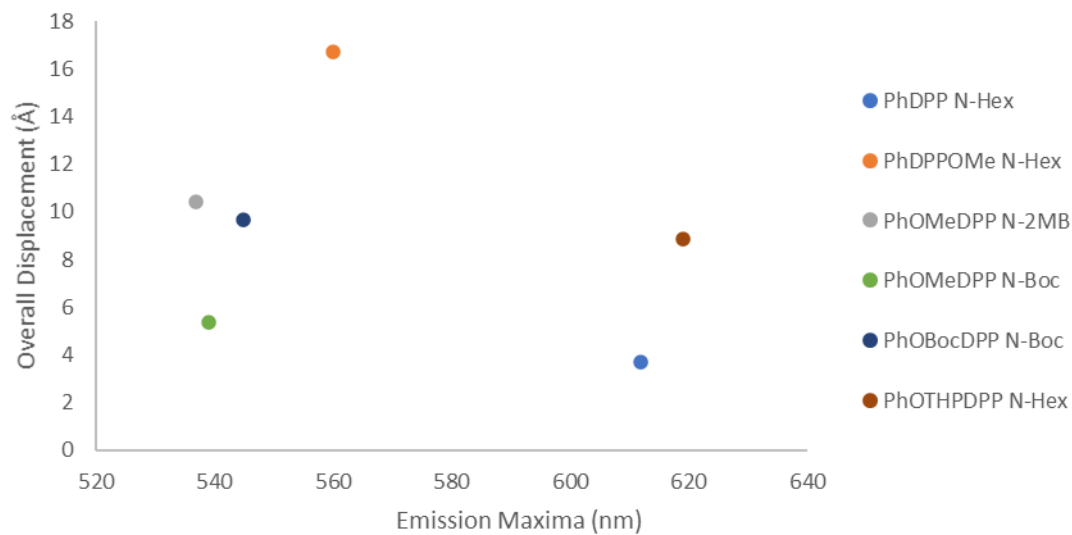

**Fig. S42** Plot of solid-state emission maxima vs. DPP-aryl angle for **PhDPP N-Hex**, **PhOMeDPP N-Hex**, **PhOMeDPP N-2MB**, **PhOMeDPP N-Boc**, **PhOBocDPP N-Boc** and **PhOTHPDPP N-Hex**

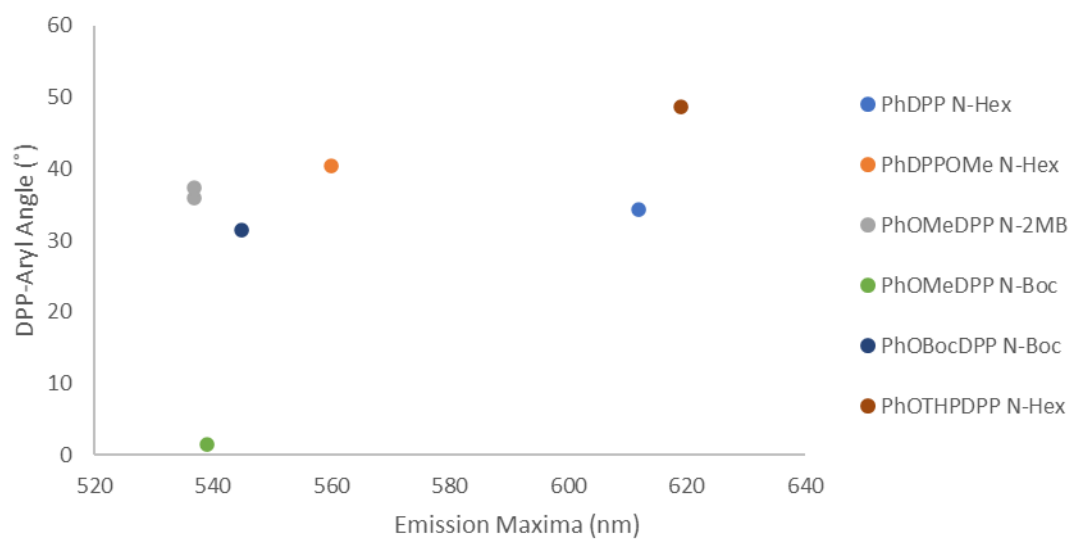

## 9. Supporting Tables

Table S1

| PhDPP <i>N</i> -Hex |       |       |            |
|---------------------|-------|-------|------------|
| Number              | Atom1 | Atom2 | Length (Å) |
| 1                   | C3    | H4    | 2.868      |
| 2                   | O1    | H3    | 2.494      |

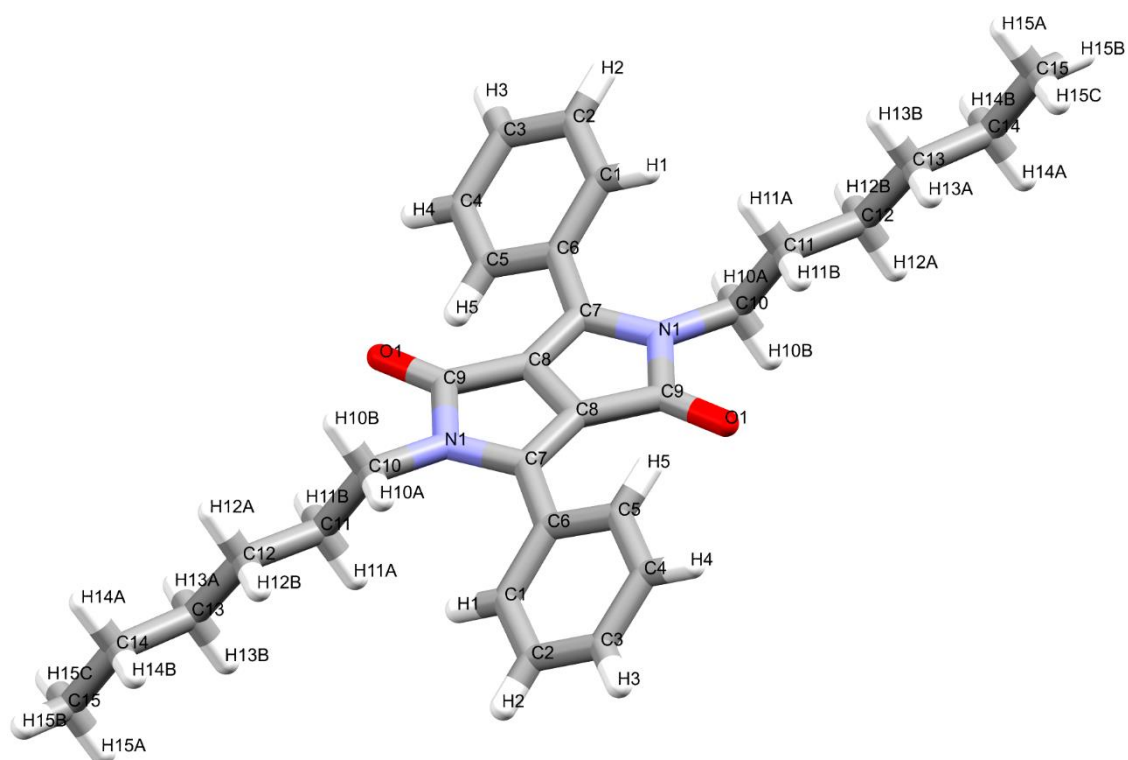

**Table S2**

| PhOMeDPP <i>N</i> -2MB |       |       |            |
|------------------------|-------|-------|------------|
| Number                 | Atom1 | Atom2 | Length (Å) |
| 1                      | C14   | H13A  | 2.876      |
| 2                      | H20C  | O1    | 2.687      |
| 3                      | H20C  | C7    | 2.816      |
| 4                      | H8    | O4    | 2.634      |
| 5                      | C15   | O2    | 3.120      |
| 6                      | H15   | O2    | 2.279      |
| 7                      | O1    | C9    | 3.183      |
| 8                      | O1    | H9    | 2.276      |
| 9                      | O1    | H26B  | 2.472      |
| 10                     | O3    | H16   | 2.595      |

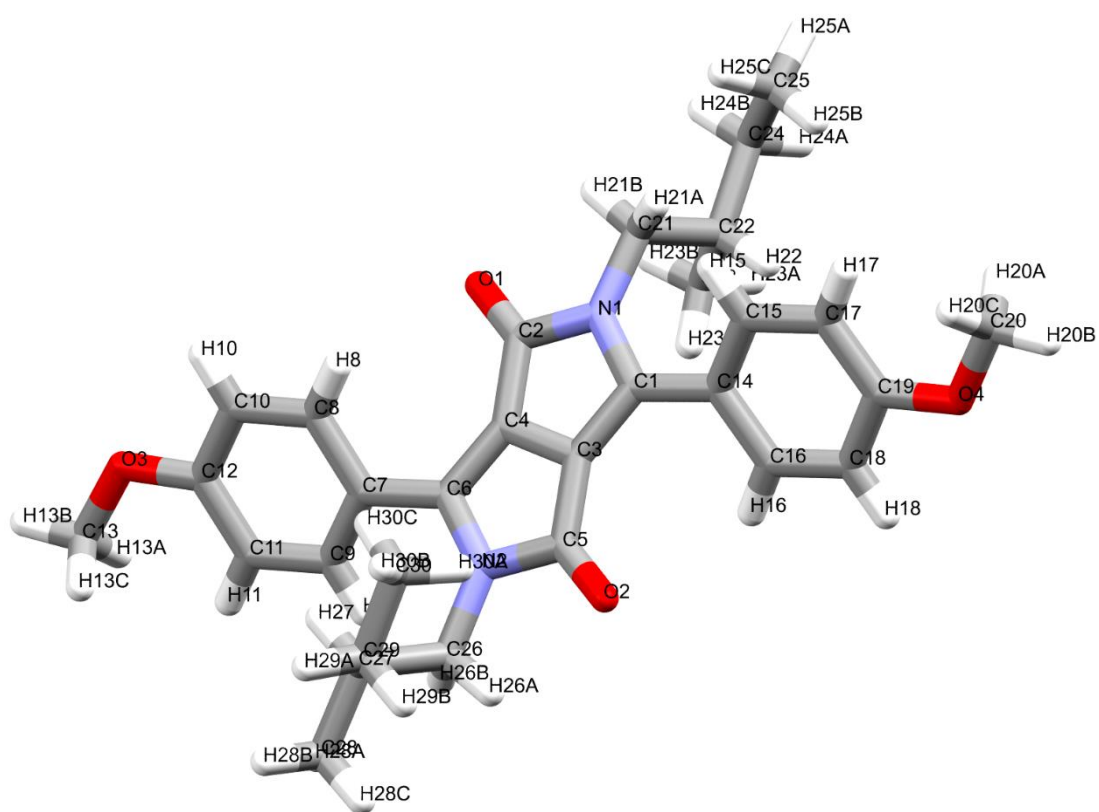

**Table S3**

| PhOMeDPP <i>N</i> -Hex |       |       |            |
|------------------------|-------|-------|------------|
| Number                 | Atom1 | Atom2 | Length (Å) |
| 1                      | O001  | H00Q  | 2.690      |
| 2                      | H00C  | C00J  | 2.893      |
| 3                      | H00C  | H00Q  | 2.380      |
| 4                      | O001  | C009  | 3.217      |
| 5                      | O001  | H009  | 2.395      |
| 6                      | O002  | H008  | 2.621      |

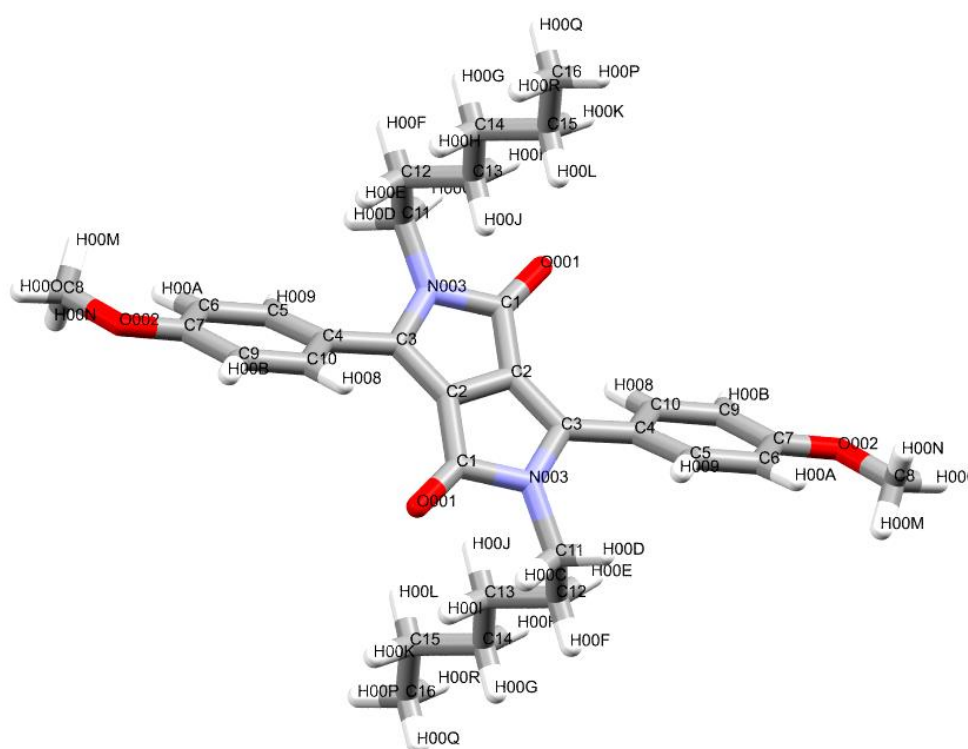



Table S4

| PhOMeDPP <i>N</i> -Boc |       |       |            |
|------------------------|-------|-------|------------|
| Number                 | Atom1 | Atom2 | Length (Å) |
| 1                      | H6    | H10B  | 2.355      |
| 2                      | C10   | C10   | 2.171      |
| 3                      | C10   | H10A  | 1.775      |
| 4                      | C10   | H10B  | 2.369      |
| 5                      | C10   | H10C  | 2.068      |
| 6                      | H10A  | H10A  | 1.874      |
| 7                      | H10A  | H10B  | 1.847      |
| 8                      | H10A  | H10C  | 1.441      |
| 9                      | H10B  | H10C  | 2.13       |
| 10                     | C3    | C5    | 3.343      |
| 11                     | C7    | C2    | 3.325      |
| 12                     | C8    | C1    | 3.342      |
| 13                     | H15C  | O1    | 2.641      |

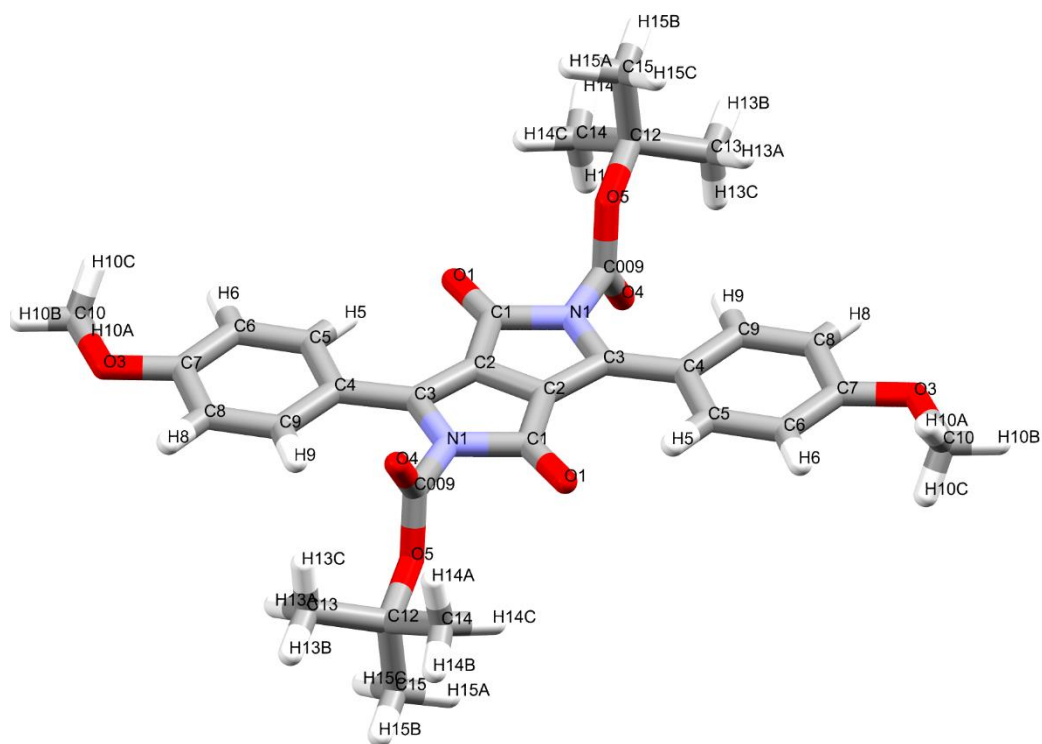

Table S5

| PhOTHPDPP <i>N</i> -Hex |       |       |            |
|-------------------------|-------|-------|------------|
| Number                  | Atom1 | Atom2 | Length (Å) |
| 1                       | H15A  | O66   | 2.712      |
| 2                       | C2    | H63A  | 2.888      |
| 3                       | C3    | H63A  | 2.83       |
| 4                       | O5    | H33   | 2.717      |
| 5                       | O5    | H11B  | 2.485      |
| 6                       | H11A  | C33   | 2.845      |
| 7                       | H11A  | H33   | 2.298      |
| 8                       | H13B  | C33   | 2.898      |

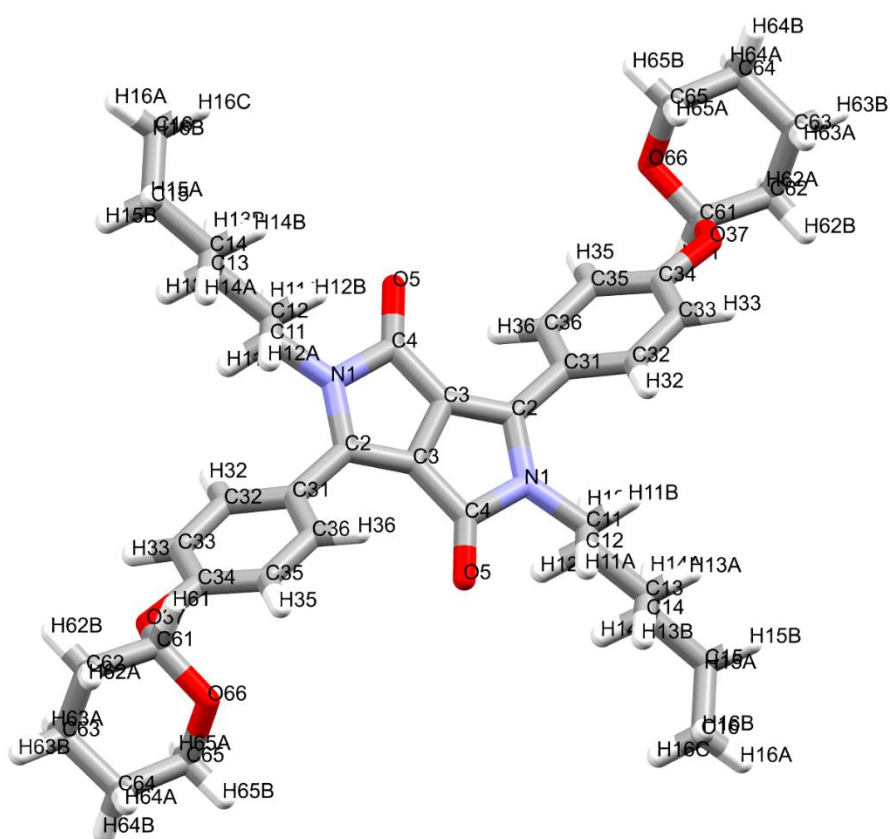

Table S6

| PhOHDPP <i>N</i> -Hex |       |       |            |
|-----------------------|-------|-------|------------|
| Number                | Atom1 | Atom2 | Length (Å) |
| 1                     | O1    | O2    | 2.681      |
| 2                     | O1    | H11B  | 2.672      |
| 3                     | H1    | O2    | 1.843      |
| 4                     | H1    | H11B  | 2.385      |
| 5                     | H6    | O2    | 2.595      |
| 6                     | O1    | H10A  | 2.647      |
| 7                     | C1    | H10A  | 2.831      |
| 8                     | C2    | H10A  | 2.841      |
| 9                     | O1    | H15A  | 2.572      |

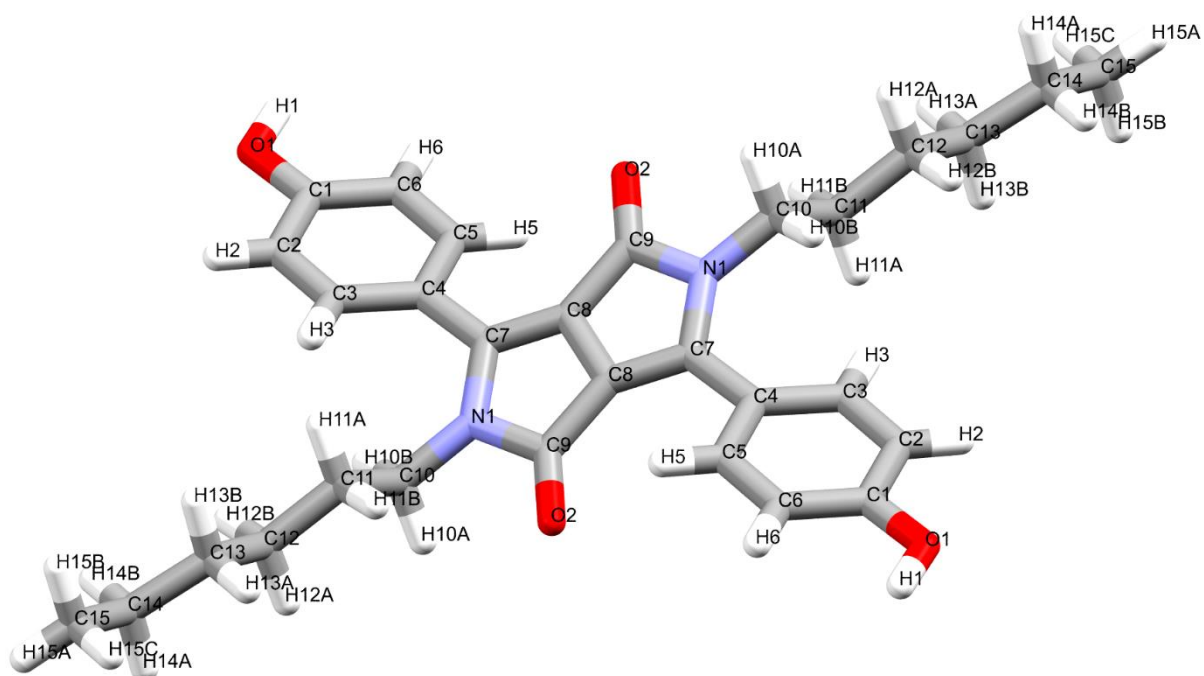

Table S7

| PhOHDP N-2MB |       |       |            |
|--------------|-------|-------|------------|
| Number       | Atom1 | Atom2 | Length (Å) |
| 1            | C17   | C6    | 3.369      |
| 2            | H28C  | O1    | 2.587      |
| 3            | O2    | O4    | 2.73       |
| 4            | O2    | H4    | 1.897      |
| 5            | O2    | H15   | 2.641      |
| 6            | C16   | H14   | 2.85       |
| 7            | O1    | O3    | 2.713      |
| 8            | H1    | O3    | 1.889      |
| 9            | H21B  | C12   | 2.857      |

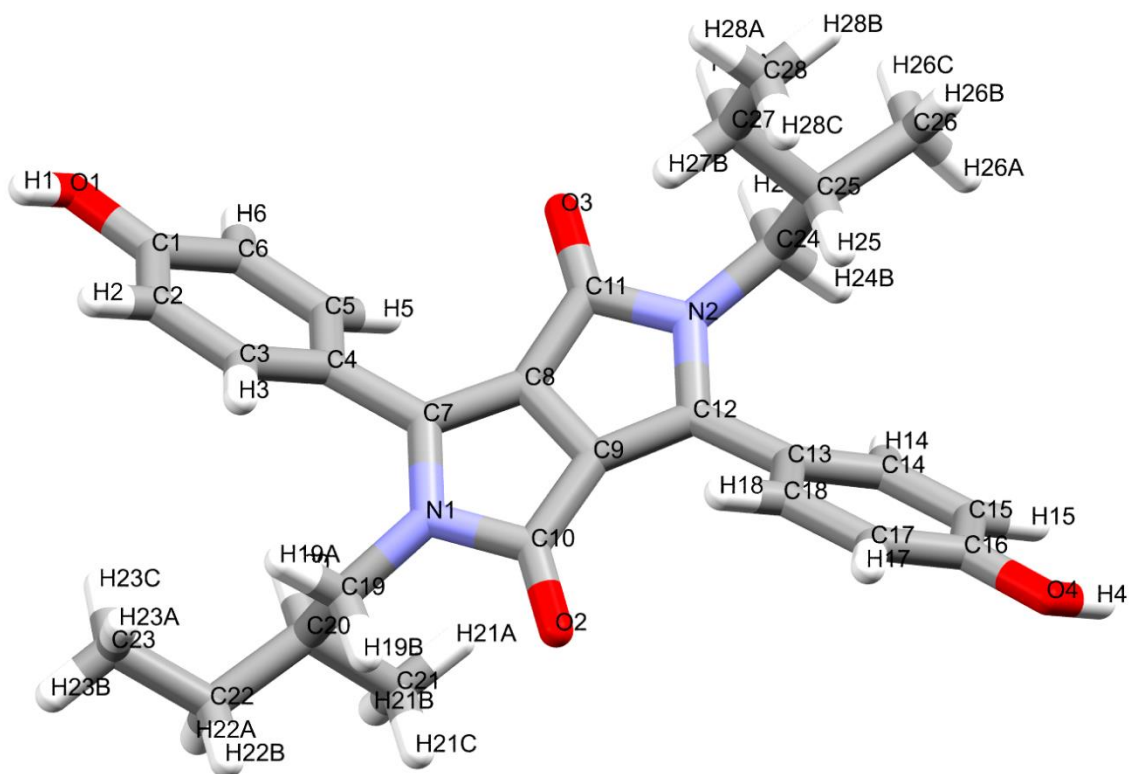

**Table S8**

| PhOBocDPP <i>N</i> -Boc |       |       |            |
|-------------------------|-------|-------|------------|
| Number                  | Atom1 | Atom2 | Length (Å) |
| 1                       | O5    | C10   | 3.108      |
| 2                       | O5    | H6    | 2.477      |
| 3                       | C5    | C7    | 3.302      |
| 4                       | O3    | H8    | 2.422      |
| 5                       | C10   | H8    | 2.883      |
| 6                       | O1    | H18B  | 2.534      |
| 7                       | O1    | H19B  | 2.679      |

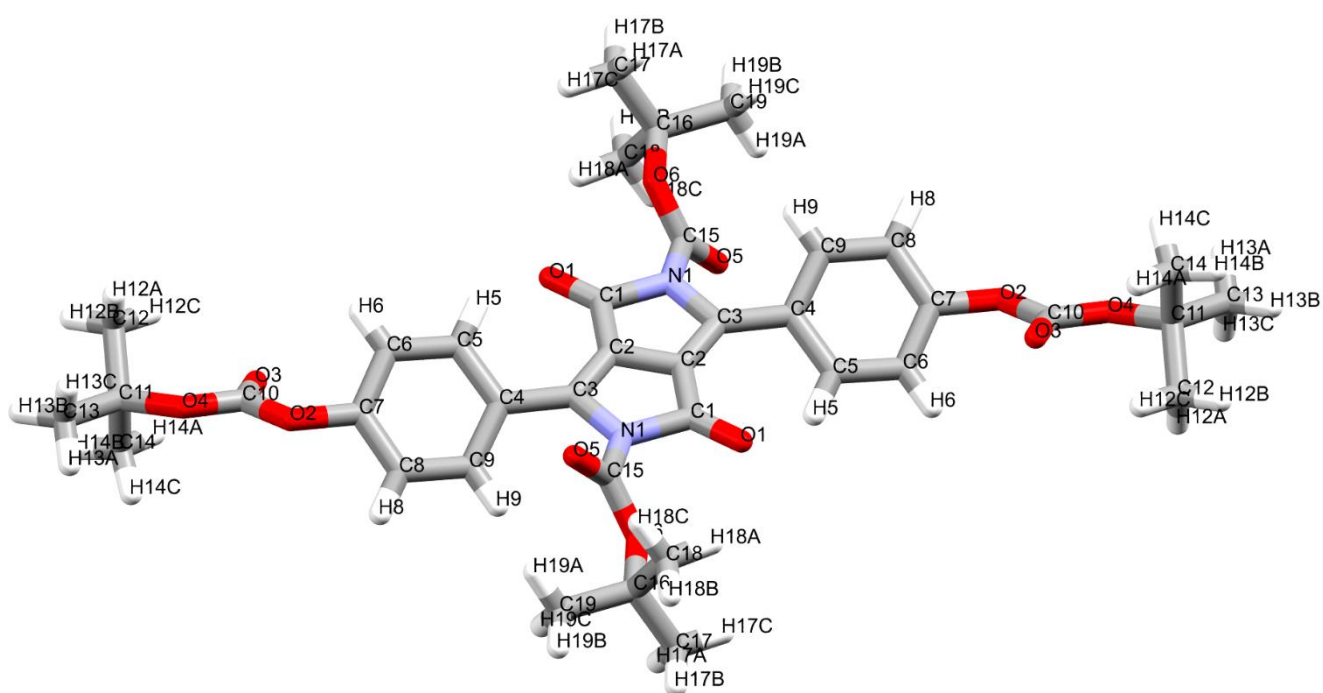

**Table S9**

| PhDPP <i>N</i> -Boc |       |       |           |
|---------------------|-------|-------|-----------|
| Number              | Atom1 | Atom2 | Length(Å) |
| 1                   | O1    | H3    | 2.645     |
| 2                   | H8    | H13   | 2.334     |
| 3                   | H9    | O2    | 2.543     |
| 4                   | H9    | C12   | 2.898     |
| 5                   | H22   | C9    | 2.839     |
| 6                   | C16   | C16   | 3.310     |
| 7                   | O6    | H10   | 2.716     |
| 8                   | O6    | H4    | 2.582     |
| 9                   | C12   | C12   | 3.342     |
| 10                  | C8    | O3    | 3.217     |
| 11                  | H1    | O3    | 2.628     |
| 12                  | H20   | C3    | 2.858     |

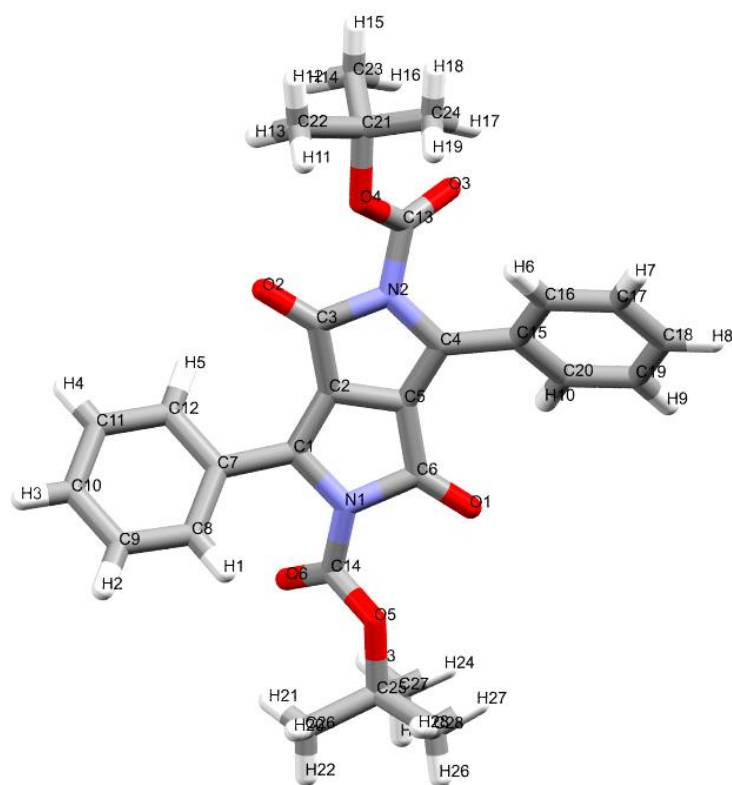

Table S10

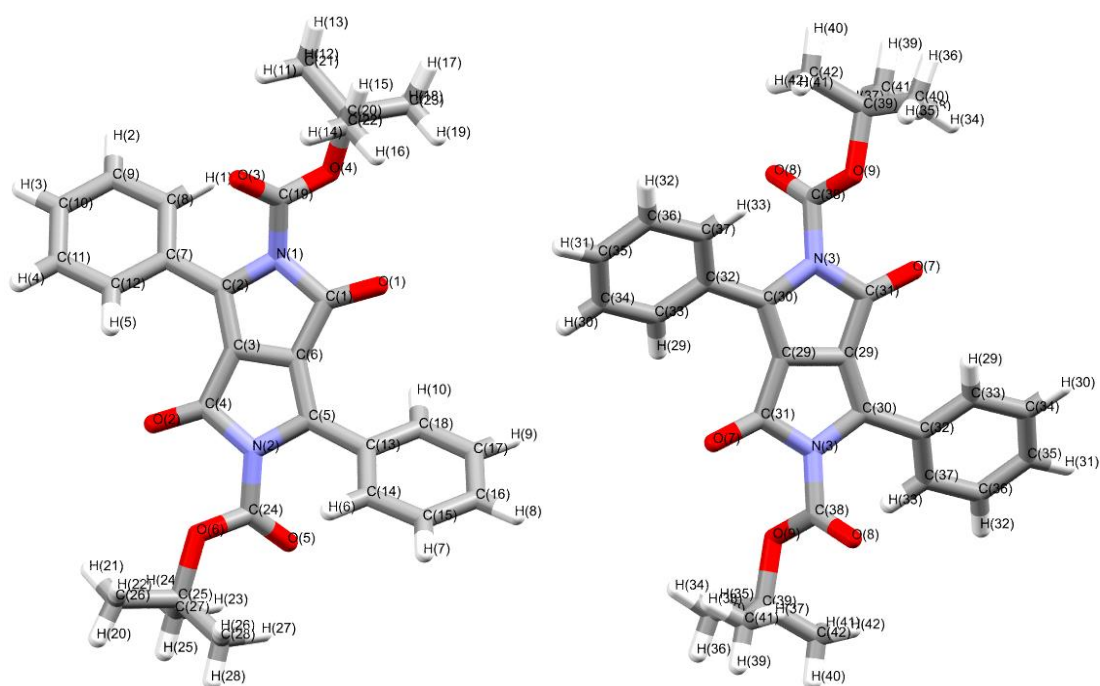

| PhDPP <i>N</i> -Boc |       |       |           |
|---------------------|-------|-------|-----------|
| Number              | Atom1 | Atom2 | Length(Å) |
| 1                   | O(2)  | C(16) | 3.140     |
| 2                   | O(2)  | H(8)  | 2.423     |
| 3                   | C(10) | O(1)  | 3.209     |
| 4                   | C(11) | O(1)  | 3.213     |
| 5                   | H(3)  | O(1)  | 2.576     |
| 6                   | H(3)  | H(19) | 2.291     |
| 7                   | H(4)  | O(1)  | 2.581     |
| 8                   | H(17) | O(5)  | 2.688     |
| 9                   | C(1)  | H(26) | 2.773     |
| 10                  | C(6)  | H(26) | 2.750     |
| 11                  | C(10) | H(30) | 2.843     |
| 12                  | O(2)  | H(37) | 2.595     |
| 13                  | C(3)  | O(8)  | 3.011     |
| 14                  | C(4)  | O(8)  | 3.002     |
| 15                  | C(5)  | O(8)  | 3.080     |
| 16                  | C(6)  | O(8)  | 3.030     |

## References

- 1 J. Cosier and A. M. Glazer, *J. Appl. Crystallogr.*, 1986, **19**, 105–107.
- 2 Rigaku Oxford Diffraction, (2018), CrysAlisPro Software system, version 1.171.40.45a, Rigaku Corporation, Oxford, UK.
- 3 O. V. Dolomanov, L. J. Bourhis, R. J. Gildea, J. A. K. Howard and H. Puschmann, *J. Appl. Crystallogr.*, 2009, **42**, 339–341.
- 4 G. M. Sheldrick, *Acta Crystallogr. Sect. A*, 2015, **71**, 3–8.
- 5 G. M. Sheldrick, *Acta Crystallogr. Sect. C Struct. Chem.*, 2015, **71**, 3–8.
- 6 “CheckCIF,” can be found under <http://checkcif.iucr.org>.
- 7 D. . Allan, H. Nowell, S. Barnett, M. Warren, A. Wilcox, J. Christensen, L. Saunders, A. Peach, M. Hooper, L. Zaja, S. Patel, L. Cahill, R. Marshall, S. Trimnell, A. Foster, T. Bates, S. Lay, M. Williams, P. Hathaway, G. Winter, M. Gerstel and R. Wooley, *Crystals*, 2017, **7**, 336.
- 8 G. Winter, D. G. Waterman, J. M. Parkhurst, A. S. Brewster, R. J. Gildea, M. Gerstel, L. Fuentes-Montero, M. Vollmar, T. Michels-Clark, I. D. Young, N. K. Sauter and G. Evans, *Acta Crystallogr. Sect. D, Struct. Biol.*, 2018, **74**, 85–97.
- 9 Journal, 2018, CCP4 7.0.062 AIMLESS, version 060.067.062 027/005/018.
- 10 A. M. Brouwer, *Pure Appl. Chem.*, 2011, **83**, 2213–2228.
- 11 R. R. Gagne, C. A. Koval and G. C. Lisensky, *Inorg. Chem.*, 1980, **19**, 2854–2855.
- 12 A. Riaño, P. Mayorga Burrezo, M. J. Mancheño, A. Timalcina, J. Smith, A. Facchetti, T. J. Marks, J. T. López Navarrete, J. L. Segura, J. Casado and R. Ponce Ortiz, *J. Mater. Chem. C*, 2014, **2**, 6376–86.
- 13 M. J. Frisch, G. W. Trucks, H. B. Schlegel, G. E. Scuseria, M. A. Robb, J. R. Cheeseman, G. Scalmani, V. Barone, B. Mennucci, G. A. Petersson, H. Nakatsuji, M. Caricato, X. Li, H. P. Hratchian, A. F. Izmaylov, J. Bloino, G. Zheng, J. L. Sonnenberg, M. Hada, M. Ehara, K. Toyota, R. Fukuda, J. Hasegawa, M. Ishida, T. Nakajima, Y. Honda, O. Kitao, H. Nakai, T. Vreven, J. A. Montgomery, J. E. Peralta, F. Ogliaro, M. Bearpark, J. J. Heyd, E. Brothers, K. N. Kudin, V. N. Staroverov, R. Kobayashi, J. Normand, K. Raghavachari, A. Rendell, J. C. Burant, S. S. Iyengar, J. Tomasi, M. Cossi, N. Rega, J. M. Millam, M. Klene, J. E. Knox, J. B. Cross, V. Bakken, C. Adamo, J. Jaramillo, R. Gomperts, R. E. Stratmann, O. Yazyev, A. J. Austin, R. Cammi, C. Pomelli, J. W. Ochterski, R. L. Martin, K. Morokuma, V. G. Zakrzewski, G. A. Voth, P. Salvador, J. J. Dannenberg, S. Dapprich, A. D. Daniels, Farkas, J. B. Foresman, J. V Ortiz, J. Cioslowski and D. J. Fox, *Gaussian 09, Revis. B.01, Gaussian, Inc., Wallingford CT*, 2009.
- 14 B. Baumeier, J. Kirkpatrick and D. Andrienko, *Phys. Chem. Chem. Phys.*, 2010, **12**, 11103–11113.
- 15 E. F. Valeev, V. Coropceanu, D. A. da Silva Filho, S. Salman and J.-L. Brédas, *J. Am. Chem. Soc.*, 2006, **128**, 9882–9886.
- 16 T. Liu and A. Troisi, *J. Phys. Chem. C*, 2011, **115**, 2406–2415.
- 17 A. N. Sokolov, S. Atahan-Evrenk, R. Mondal, H. B. Akkerman, R. S. Sánchez-Carrera, S. Granados-Focil, J. Schrier, S. C. B. Mannsfeld, A. P. Zoombelt, Z. Bao and A. Aspuru-Guzik, *Nat. Commun.*, 2011, **2:437**, 1–8.



- 18 W. K. Chan, Y. Chen, Z. Peng and L. Yu, *J. Am. Chem. Soc.*, 1993, **115**, 11735–11743.
- 19 A. Shaabani, M. Dabiri, A. Bazgir and K. Gharanjig, *Dye. Pigm.*, 2006, **71**, 68–72.
- 20 Ciba Specialty Chemicals Corporation, USPat.,5969154, 1999.
